# Supplementary material for: Spontaneous and evoked neurotransmission are partially segregated at inhibitory synapses
Source: eLife. 2020 May 13;9:e52852. doi: 10.7554/eLife.52852 (PMC7250572; doi:10.7554/eLife.52852)
Supplement: Figure 1—figure supplement 1—source data 1. [file elife-52852-fig1-figsupp1-data1.xlsx]

## Sheet: S1B
Example traces in S1A taken from bolded file at time points indicated in legend
Condition:	File Name:	Average Frequency (Hz)
Mini Before PTX	2017_05_13_0002	0.11824
Mini After PTX		0.0437736
Mini Before PTX	2017_05_13_0008	0.372333
Mini After PTX		0.094766
Mini Before PTX	2017_05_14_0001	0.460909
Mini After PTX		0.298001
Mini Before PTX	2017_05_14_0004	0.524463
Mini After PTX		0.25339
Mini Before PTX	2017_05_21_0001	1.93131
Mini After PTX		0.789436
Mini Before PTX	2017_05_21_0008	2.11988
Mini After PTX		0.663528
Mini Before PTX	2017_05_21_0011	1.18728
Mini After PTX		0.799639
Mini Before PTX	2017_05_21_0015	1.43304
Mini After PTX		0.58681

## Sheet: S1C
Condition:	File Name:	Average Amplitude (pA)
Mini Before PTX	2017_05_13_0002	11.1826
Mini After PTX		8.16362
Mini Before PTX	2017_05_13_0008	12.8988
Mini After PTX		10.6256
Mini Before PTX	2017_05_14_0001	28.7261
Mini After PTX		16.3348
Mini Before PTX	2017_05_14_0004	21.9776
Mini After PTX		17.9685
Mini Before PTX	2017_05_21_0001	23.1243
Mini After PTX		19.8512
Mini Before PTX	2017_05_21_0008	22.7739
Mini After PTX		14.0507
Mini Before PTX	2017_05_21_0011	21.9302
Mini After PTX		16.6407
Mini Before PTX	2017_05_21_0015	18.321
Mini After PTX		12.9449

## Sheet: S1E
Example traces in S1D taken from bolded file at time points indicated in legend
Condition:	File Name:	Average frequency (Hz)
Mini Before PTX	2017_05_13_0005	0.990272
Mini After PTX		0.0581353
Mini Before PTX	2017_06_23_0001	0.141667
Mini After PTX		0.0333333
Mini Before PTX	2017_06_23_0004	0.233333
Mini After PTX		0.0333333
Mini Before PTX	2017_06_23_0010	0.391667
Mini After PTX		0.0583333
Mini Before PTX	2017_07_12_0001	3.65669
Mini After PTX		0.291667
Mini Before PTX	2017_07_12_0004	3.00775
Mini After PTX		0.158037
Mini Before PTX	2017_07_12_0007	2.58396
Mini After PTX		0.166667
Mini Before PTX	2017_07_12_0010	2.86512
Mini After PTX		0.2
Mini Before PTX	2017_07_12_0013	1.06034
Mini After PTX		0.0416667
Mini Before PTX	2017_10_13_0013	0.925059
Mini After PTX		0.025
Mini Before PTX	2017_10_13_0016	2.6005
Mini After PTX		0.150408
Mini Before PTX	2017_10_13_0019	1.3
Mini After PTX		0.0166667

## Sheet: S1F
Condition:	File Name:	Average Amplitude (pA)
Mini Before PTX	2017_05_13_0005	16.4103
Mini After PTX		9.06814
Mini Before PTX	2017_06_23_0001	11.4889
Mini After PTX		6.56125
Mini Before PTX	2017_06_23_0004	11.4005
Mini After PTX		10.2235
Mini Before PTX	2017_06_23_0010	12.337
Mini After PTX		10.071
Mini Before PTX	2017_07_12_0001	28.3173
Mini After PTX		11.7971
Mini Before PTX	2017_07_12_0004	19.3687
Mini After PTX		10.2743
Mini Before PTX	2017_07_12_0007	16.1481
Mini After PTX		12.0849
Mini Before PTX	2017_07_12_0010	24.0804
Mini After PTX		13.7965
Mini Before PTX	2017_07_12_0013	16.5594
Mini After PTX		13.0614
Mini Before PTX	2017_10_13_0013	15.7262
Mini After PTX		10.681
Mini Before PTX	2017_10_13_0016	19.5293
Mini After PTX		18.1849
Mini Before PTX	2017_10_13_0019	14.3098
Mini After PTX		8.85
