# Supplementary material for: Spontaneous and evoked neurotransmission are partially segregated at inhibitory synapses
Source: eLife. 2020 May 13;9:e52852. doi: 10.7554/eLife.52852 (PMC7250572; doi:10.7554/eLife.52852)
Supplement: Figure 1—source data 1. [file elife-52852-fig1-data1.xlsx]

## Sheet: 1B
Exemplar in 1A taken from average of events in bolded file
Condition:	File Name:	Average decay time (ms)
Mini Before PTX	2017_05_13_0005	10.5462
Mini After PTX		3.88571
Mini Before PTX	2017_06_23_0001	15.3294
Mini After PTX		10.1
Mini Before PTX	2017_06_23_0004	10.3571
Mini After PTX		2.75
Mini Before PTX	2017_06_23_0010	7.39574
Mini After PTX		5.37143
Mini Before PTX	2017_07_12_0001	9.46907
Mini After PTX		3.79429
Mini Before PTX	2017_07_12_0004	9.54754
Mini After PTX		3.73333
Mini Before PTX	2017_07_12_0007	7.46561
Mini After PTX		4.9
Mini Before PTX	2017_07_12_0010	10.6321
Mini After PTX		4.75
Mini Before PTX	2017_07_12_0013	6.58121
Mini After PTX		2.64
Mini Before PTX	2017_10_13_0013	7.05225
Mini After PTX		1.4
Mini Before PTX	2017_10_13_0016	7.50161
Mini After PTX		3.91765
Mini Before PTX	2017_10_13_0019	6.01677
Mini After PTX		3.7

## Sheet: 1D
Each group represents recordings from 1 cell
Exmplar in 1C taken from average of 1st event in "Evoked Before" files and last event in "Evoked After" files
Condition:	File Name	Average decay time (ms)
Evoked Before PTX	2017_05_13_0004	110.377
Evoked After PTX	2017_05_13_0006	83.6261
Evoked Before PTX	2017_06_23_0000	71.5577
Evoked After PTX	2017_06_23_0002	55.6711
Evoked Before PTX	2017_06_23_0003	117.277
Evoked After PTX	2017_06_23_0005	55.0386
Evoked Before PTX	2017_06_23_0006	84.3251
Evoked After PTX	2017_06_23_0008	28.8173
Evoked Before PTX	2017_06_23_0009	131.721
Evoked After PTX	2017_06_23_0011	53.0071
Evoked Before PTX	2017_07_12_0000	434.476
Evoked After PTX	2017_07_12_0002	230.369
Evoked Before PTX	2017_07_12_0003	321.237
Evoked After PTX	2017_07_12_0005	99.0469
Evoked Before PTX	2017_07_12_0006	237.121
Evoked After PTX	2017_07_12_0008	85.9995
Evoked Before PTX	2017_07_12_0009	319.06
Evoked After PTX	2017_07_12_0011	116.149
Evoked Before PTX	2017_07_12_0012	338.577
Evoked After PTX	2017_07_12_0014	141.956
Evoked Before PTX	2017_10_13_0012	236.688
Evoked After PTX	2017_10_13_0014	68.7104
Evoked Before PTX	2017_10_13_0015	314.27
Evoked After PTX	2017_10_13_0017	190.588
Evoked Before PTX	2017_10_13_0018	165.399
Evoked After PTX	2017_10_13_0020	77.5909

## Sheet: 1E
Measurements are individual evoked peak amplitudes (pA)
				Stimulation number:
PTX?:	Frequency:	File Name:		1	2	3	4	5	6	7	8	9	10
Yes	1 Hz	2017_07_30_0004	raw	-5748.29	-5355.29	-5093.71	-4870.07	-4783.14	-4593.11	-4337.91	-3990.33	-3855.4	-3853.57
			percent 1st	100	93.1632	88.6127	84.7222	83.2099	79.904	75.4644	69.4178	67.0704	67.0386
Yes	1 Hz	2017_07_28_0002	raw	-3459.26	-2659.43	-2346.06	-2129.12	-2117.86	-1831.34	-1758.45	-1625.13	-1449.69	-1492.15
			percent 1st	100	76.8787	67.8196	61.5484	61.2231	52.9404	50.8331	46.979	41.9076	43.135
Yes	1 Hz	2017_07_29_0002	raw	-5798.12	-4736.54	-4342.73	-4082.2	-3431.96	-3412.03	-3153.35	-3060.16	-2686.82	-2456.17
			percent 1st	100	81.6909	74.899	70.4056	59.1908	58.8472	54.3857	52.7785	46.3394	42.3615
Yes	1Hz	2017_07_29_0005	raw	-2719.9	-2520.89	-2426.67	-2315.51	-2256.31	-2164.36	-2110.83	-2021.97	-1953.63	-1936.72
			percent 1st	100	92.6831	89.2192	85.1321	82.9555	79.5751	77.607	74.3398	71.8275	71.2057
Yes	1 Hz	2017_07_30_0001	raw	-4282.01	-3559.69	-3222.14	-2599.88	-2394.31	-2328.35	-2320.04	-2174.39	-2051.51	-2010.28
			percent 1st	100	83.1313	75.2483	60.7163	55.9157	54.3752	54.1812	50.7798	47.9101	46.9472
Yes	0.2 Hz	2017_07_30_0003	raw	-5097.14	-4618.23	-4374.59	-4250.9	-4113.67	-4021.17	-3887.24	-3746.57	-3633.5	-3379.05
			percent 1st	100	90.6045	85.8244	83.3979	80.7054	78.8908	76.2633	73.5035	71.2852	66.2932
Yes	0.2 Hz	2017_07_28_0003	raw	-3447.46	-2939.81	-2697.21	-2381.27	-2225.74	-2099.77	-1916.87	-1770.22	-1616.59	-1567.35
			percent 1st	100	85.2746	78.2377	69.0733	64.5619	60.9078	55.6025	51.3486	46.8921	45.464
Yes	0.2 Hz	2017_07_29_0001	raw	-5282.61	-4572.64	-4126.58	-3792.09	-3414.28	-3215.53	-2965.21	-2862.1	-2581.2	-2591.42
			percent 1st	100	86.5603	78.1164	71.7844	64.6325	60.8702	56.1315	54.1797	48.8621	49.0556
Yes	0.2 Hz	2017_07_29_0004	raw	-4253.28	-3657.39	-3463.96	-3022.45	-2789.12	-2682.17	-2650.9	-2309.03	-2297.44	-2157.44
			percent 1st	100	85.9897	81.442	71.0615	65.5757	63.0613	62.326	54.2881	54.0157	50.7241
Yes	0.2 Hz	2017_07_29_0007	raw	-1284.57	-1131.44	-1011.18	-956.993	-868.584	-826.36	-801.878	-723.359	-675.893	-692.835
			percent 1st	100	88.0796	78.7174	74.4991	67.6167	64.3297	62.4239	56.3114	52.6163	53.9352
Yes	0.2 Hz	2017_07_30_0000	raw	-3298.45	-2628.54	-2491.22	-2335.67	-2295.4	-2193.82	-2119.95	-2023.31	-1989.47	-1872.61
			percent 1st	100	79.6903	75.5269	70.8112	69.5904	66.5106	64.2713	61.3412	60.3152	56.7723
Yes	0.1 Hz	2017_07_28_0001	raw	-3689.69	-3108.61	-2981.69	-2820.47	-2618.41	-2514.78	-2365.65	-2259.02	-2099.83	-1864.28
			percent 1st	100	84.2512	80.8115	76.4419	70.9656	68.1569	64.1151	61.2253	56.9107	50.5266
Yes	0.1 Hz	2017_07_29_0000	raw	-5733.61	-5222.15	-4793.23	-4455.41	-4146	-3996.43	-3929.7	-3731.33	-3593.83	-3483.25
			percent 1st	100	91.0796	83.5989	77.707	72.3105	69.7018	68.5379	65.0782	62.6801	60.7514
Yes	0.1Hz	2017_07_29_0003	raw	-6006.34	-5029.53	-4484.48	-3941.34	-3724.17	-3253.13	-3082.81	-2807.89	-2497.88	-2350.59
			percent 1st	100	83.737	74.6623	65.6197	62.004	54.1617	51.3259	46.7487	41.5874	39.1351
Yes	0.1 Hz	2017_07_29_0006	raw	-1461.99	-1330.88	-1248.65	-1196.99	-1109.1	-1021.87	-1005.24	-947.865	-875.531	-849.854
			percent 1st	100	91.0323	85.4081	81.874	75.8626	69.896	68.7584	64.8341	59.8865	58.1301
Yes	0.1 Hz	2017_07_30_0002	raw	-4914.14	-4461.36	-4138.32	-3810.41	-3607.2	-3382.7	-3291.31	-3084.1	-2935.27	-2735.22
			percent 1st	100	90.7862	84.2126	77.5398	73.4047	68.8362	66.9764	62.7598	59.7312	55.6602
No	0.2 Hz	2019_03_06_0002	raw	-4564.93	-4366.57	-4299.69	-4185.57	-4170.83	-4160.72	-4083.11	-4015.02	-4000.24	-3945.77
			percent 1st	100	95.6547	94.1897	91.6898	91.367	91.1454	89.4452	87.9536	87.6299	86.4367
No	0.2 Hz	2019_03_06_0005	raw	-5387.36	-5088.93	-5075.67	-5158.67	-5028.86	-4893.33	-4989.07	-4815.9	-4874.07	-4834.58
			percent 1st	100	94.4607	94.2145	95.7551	93.3457	90.8298	92.607	89.3926	90.4723	89.7394
No	0.2 Hz	2019_03_06_0008	raw	-4117.61	-3760.53	-3576.4	-3529.6	-3527.76	-3436.78	-3432.2	-3417.41	-3376.83	-3196.81
			percent 1st	100	91.328	86.8561	85.7196	85.675	83.4654	83.354	82.9949	82.0094	77.6375
No	0.2 Hz	2019_03_07_0000	raw	-2626	-2409.94	-2469.54	-2372.52	-2244.83	-2274.28	-2233.33	-2163.36	-2208.33	-2152.24
			percent 1st	100	91.7725	94.042	90.3473	85.4848	86.6065	85.047	82.3824	84.0949	81.9591
No	0.2 Hz	2019_03_07_0001	raw	-3049.31	-2778.78	-2744.62	-2636.14	-2655.02	-2605.02	-2638.68	-2586.05	-2561.76	-2565.53
			percent 1st	100	91.1281	90.008	86.4504	87.0696	85.4299	86.5337	84.8076	84.0112	84.1348
No	0.2 Hz	2019_03_29_0037	raw	-3586.73	-3410.34	-3358.46	-3180.24	-3204.65	-3097.23	-2994.69	-3130.8	-3050.84	-3175.35
			percent 1st	100	95.0821	93.6357	88.6667	89.3474	86.3524	83.4936	87.2884	85.0591	88.5306
No	0.2 Hz	2019_03_29_0040	raw	-6207.58	-5493.47	-5254.21	-5252.99	-5191.35	-5118.1	-5034.48	-4961.24	-4910.58	-4997.86
			percent 1st	100	88.4961	84.6419	84.6222	83.6291	82.4492	81.1022	79.9223	79.1062	80.5123
No	0.2 Hz	2019_03_29_0042	raw	-1829.53	-1604.92	-1562.81	-1576.84	-1455.38	-1371.77	-1537.78	-1432.19	-1506.04	-1370.54
			percent 1st	100	87.7231	85.4212	86.1885	79.5496	74.9791	84.0534	78.2819	82.3186	74.9124
No	0.2 Hz	2019_03_29_0043	raw	-3763.12	-3084.41	-2914.12	-2877.5	-2903.14	-2878.11	-2897.64	-2906.19	-2811.58	-2861.63
			percent 1st	100	81.9642	77.439	76.4658	77.147	76.482	77.0011	77.2281	74.7141	76.0441
No	0.2 Hz	2019_03_31_0002	raw	-2046.05	-1724.7	-1468.35	-1278.53	-1258.7	-1197.97	-1294.1	-1234.89	-1295.32	-1333.47
			percent 1st	100	84.2941	71.7652	62.4879	61.5184	58.5502	63.2486	60.355	63.3082	65.1726
No	0.2 Hz	2019_03_31_0004	raw	-1603.24	-1498.26	-1438.14	-1397.25	-1334.99	-1326.45	-1323.09	-1259.31	-1309.66	-1221.77
			percent 1st	100	93.452	89.7021	87.1514	83.2683	82.7353	82.5259	78.5476	81.6884	76.2063
No	0.1 Hz	2017_06_23_0003	raw	-1174.79	-993.288	-886.284	-854.882	-811.284	-868.996	-847.519	-763.672	-846.35	-860.378
			percent 1st	100	84.5506	75.4421	72.7692	69.058	73.9706	72.1424	65.0052	72.0429	73.237
No	0.1 Hz	2017_06_23_0006	raw	-877.679	-976.281	-1064.07	-928.024	-999.461	-1008.31	-985.824	-946.41	-803.488	-896.844
			percent 1st	100	111.234	121.237	105.736	113.875	114.883	112.322	107.831	91.547	102.184
No	0.1 Hz	2017_06_23_0009	raw	-1480.77	-1501.2	-1391.89	-1455.44	-1410.16	-1409.04	-1466.2	-1349.87	-1385.54	-1502.73
			percent 1st	100	101.379	93.9971	98.2894	95.2312	95.1557	99.0157	91.1596	93.5687	101.483
No	0.1 Hz	2017_07_12_0000	raw	-5997.1	-5519.41	-5390.64	-5281.58	-5144.3	-5073.85	-5027.22	-4929.71	-4920.45	-4893.19
			percent 1st	100	92.0347	89.8874	88.0689	85.7797	84.6051	83.8275	82.2015	82.0471	81.5925
No	0.1 Hz	2017_07_12_0003	raw	-5287.54	-4720.07	-4514.24	-4480.98	-4293.34	-4181.62	-4160.83	-4131.37	-4054.39	-4008.13
			percent 1st	100	89.2678	85.3749	84.7459	81.1973	79.0844	78.6912	78.134	76.6782	75.8032
No	0.1 Hz	2017_07_12_0006	raw	-5697.9	-5299.64	-5218.63	-5162.83	-5175.26	-5113.03	-5046.5	-4976.69	-4907.61	-4867.23
			percent 1st	100	93.0103	91.5887	90.6093	90.8275	89.7352	88.5677	87.3425	86.1301	85.4215
No	0.1 Hz	2017_07_12_0009	raw	-7117.93	-6676.38	-6465.04	-6320.41	-6349.06	-6252.93	-6168.25	-6130.19	-6036.36	-5939.16
			percent 1st	100	93.7966	90.8276	88.7957	89.1981	87.8476	86.6579	86.1232	84.8049	83.4393
No	0.1 Hz	2017_07_12_0012	raw	-5991.9	-5724.61	-5575.11	-5478.06	-5484.76	-5417.22	-5391.07	-5353.95	-5387.95	-5349.88
			percent 1st	100	95.5392	93.0441	91.4245	91.5362	90.4091	89.9727	89.3532	89.9207	89.2852
No	0.1 Hz	2017_10_13_0012	raw	-3560.33	-3440.75	-3375.74	-3333.96	-3249.26	-3269.95	-3207.18	-3285.06	-3149.99	-3158.95
			percent 1st	100	96.6412	94.8155	93.6418	91.263	91.8441	90.081	92.2686	88.4746	88.7265
No	0.1 Hz	2017_10_13_0015	raw	-4120.54	-3812.72	-3676.62	-3556.3	-3537.65	-3456.25	-3472.69	-3394.85	-3419.19	-3471.53
			percent 1st	100	92.5296	89.2265	86.3066	85.854	83.8784	84.2776	82.3885	82.979	84.2492
No	0.1 Hz	2017_10_13_0018	raw	-4888.43	-4556.49	-4558.52	-4447.83	-4350.68	-4284.68	-4187.04	-4058.92	-3950.58	-3879.33
			percent 1st	100	93.2097	93.2511	90.9869	88.9996	87.6494	85.652	83.0312	80.8149	79.3574
No	0.1 Hz	2017_10_05_0026	raw	-5853.24	-5856.97	-5618.7	-5585.14	-5529.68	-5503.04	-5515.88	-5352.69	-5268.86	-5212.81
			percent 1st	100	100.064	95.9929	95.4197	94.4721	94.017	94.2364	91.4483	90.0161	89.0585
No	0.1 Hz	2017_10_05_0037	raw	-3837.69	-3771.56	-3805.18	-3877.45	-3857.61	-3954.35	-3943.8	-3881.8	-3810.33	-4090.45
			percent 1st	100	98.2769	99.153	101.036	100.519	103.04	102.765	101.149	99.287	106.586
No	0.1 Hz	2017_10_13_0003	raw	-4523.05	-4199.97	-4250.56	-4146.68	-4146.81	-4201	-4315.61	-4278.92	-4347.57	-4411.23
			percent 1st	100	92.857	93.9756	91.6789	91.6817	92.88	95.4137	94.6026	96.1204	97.5278
No	0.1 Hz	2017_10_13_0006	raw	-3886.02	-3711.29	-3597.65	-3536.91	-3502.16	-3471.26	-3403.62	-3371.59	-3318.21	-3334.87
			percent 1st	100	95.5035	92.5792	91.0163	90.1219	89.3268	87.5862	86.762	85.3885	85.817
No	0.1 Hz	2017_10_13_0009	raw	-4738.54	-4424.48	-4435.28	-4429.52	-4348.38	-4300.8	-4228.33	-4184.52	-4169.3	-4093.74
			percent 1st	100	93.3722	93.6001	93.4785	91.7662	90.7622	89.2328	88.3082	87.9871	86.3925
No	0.1 Hz	2017_09_07_0007	raw	-2658.07	-2555.83	-2474.13	-2461.21	-2482.93	-2491.59	-2509.65	-2428.04	-2502.28	-2410.64
			percent 1st	100	96.1536	93.0798	92.5938	93.4108	93.7368	94.416	91.3458	94.139	90.6912
No	0.1 Hz	2017_09_07_0010	raw	-2279.59	-2174.67	-2088.47	-2046.45	-2074.67	-2064.85	-2052.46	-1985.41	-2057.3	-2018.22
			percent 1st	100	95.3971	91.6161	89.7724	91.0103	90.5797	90.0362	87.0951	90.2485	88.5344
No	0.1 Hz	2017_12_04_0000	raw	-2906.61	-2780.65	-2766.64	-2738.49	-2750.37	-2731.11	-2718.22	-2709.56	-2722.23	-2721.38
			percent 1st	100	95.6662	95.1844	94.2159	94.6245	93.9618	93.5185	93.2206	93.6564	93.6271
No	0.1 Hz	2017_12_04_0004	raw	-6101.07	-5891.04	-5792.51	-5749.05	-5681.6	-5650.36	-5607.43	-5557.63	-5498.35	-5471.41
			percent 1st	100	96.5575	94.9425	94.2301	93.1246	92.6125	91.9089	91.0927	90.121	89.6794
No	0.1 Hz	2017_12_05_0000	raw	-7048.21	-6675.18	-6559.52	-6475.92	-6407.75	-6321.58	-6315.94	-6272.57	-6204.81	-6182.86
			percent 1st	100	94.7075	93.0665	91.8804	90.9132	89.6906	89.6106	88.9953	88.0339	87.7224
No	0.1 Hz	2017_12_05_0004	raw	-4363.38	-4185.35	-4106.48	-4076.67	-4066.37	-3999.46	-3964.97	-3887.15	-3800.61	-3775.07
			percent 1st	100	95.9199	94.1123	93.4292	93.1931	91.6596	90.8692	89.0858	87.1024	86.5173
No	0.1 Hz	2017_12_05_0013	raw	-4039.88	-3942.21	-3839.38	-3836.71	-3850.42	-3812.88	-3775.44	-3727.74	-3647.27	-3646.67
			percent 1st	100	97.5826	95.0371	94.9709	95.3104	94.3811	93.4544	92.2735	90.2816	90.2669
No	0.1 Hz	2018_02_02_0009	raw	-3860.42	-3770.13	-3682.55	-3622.58	-3555.15	-3533.39	-3449.45	-3349.53	-3367.06	-3372.23
			percent 1st	100	97.661	95.3924	93.839	92.0922	91.5286	89.3542	86.7659	87.22	87.354
No	0.1 Hz	2018_02_03_0000	raw	-3901.55	-3717.46	-3592.36	-3534.17	-3406.25	-3343.93	-3229.43	-3215.77	-3080.9	-3062.04
			percent 1st	100	95.2816	92.075	90.5837	87.3049	85.7076	82.7729	82.4228	78.9661	78.4826
No	0.1 Hz	2018_02_05_0000	raw	-2796.98	-2711.69	-2601.39	-2574.62	-2517.03	-2479.76	-2467.56	-2449.63	-2438.1	-2418.2
			percent 1st	100	96.9507	93.0072	92.05	89.9909	88.6583	88.2223	87.5813	87.1691	86.4573
No	0.1 Hz	2018_02_02_0000	raw	-3842.91	-3618.42	-3553.89	-3501.29	-3443.49	-3409.42	-3292.47	-3276.37	-3273.69	-3184.22
			percent 1st	100	94.1585	92.4793	91.1105	89.6065	88.7198	85.6766	85.2576	85.1878	82.8597
No	0.1 Hz	2018_02_02_0003	raw	-2601.08	-2498.45	-2505.76	-2497.44	-2582.57	-2592.54	-2473.46	-2426.03	-2397.59	-2376.17
			percent 1st	100	96.0544	96.3356	96.0155	99.2883	99.6719	95.0936	93.2703	92.1769	91.3531
No	0.1 Hz	2018_02_02_0006	raw	-3777.02	-3619.07	-3549.23	-3543.72	-3503.61	-3451.19	-3437.6	-3412.32	-3239.26	-3278.12
			percent 1st	100	95.8182	93.969	93.8232	92.7613	91.3736	91.0137	90.3443	85.7624	86.7914
No	0.1 Hz	2018_02_03_0003	raw	-5470.1	-5037.6	-5151.74	-5243.37	-5197.74	-5259.43	-5488.25	-5489.24	-5526.6	-5620
			percent 1st	100	92.0934	94.18	95.8551	95.0209	96.1487	100.332	100.35	101.033	102.74
No	0.1 Hz	2019_04_16_0001	raw	-1674.68	-1895.27	-1905.57	-1856.05	-1532.29	-1831.76	-1429.48	-1504.34	-1824.44	-1517.44
			percent 1st	100	113.172	113.787	110.83	91.4974	109.38	85.3583	89.8282	108.943	90.6105
No	0.1 Hz	2019_04_16_0003	raw	-6663.9	-6132.98	-5963.84	-5784.72	-5781.18	-5764.56	-5638.98	-5648.29	-5569.54	-9927.93
			percent 1st	100	92.033	89.4947	86.8068	86.7537	86.5044	84.6199	84.7595	83.5777	148.981
No	0.1 Hz	2019_04_16_0006	raw	-3083.09	-2625.02	-2504.64	-2688.43	-2765.46	-3100.14	-2926.39	-2853.46	-2867.05	-3119.32
			percent 1st	100	85.1426	81.2381	87.1991	89.6978	100.553	94.9176	92.5519	92.9927	101.175
No	0.1 Hz	2019_04_16_0008	raw	-3401.06	-3420.24	-3385.34	-3225.81	-3288.92	-3242.47	-3193.49	-3186.85	-3233.26	-3248.85
			percent 1st	100	100.564	99.5379	94.8474	96.703	95.337	93.8971	93.7017	95.0663	95.5246
No	0.1 Hz	2019_04_17_0003	raw	-4126.96	-3920.53	-3974.76	-3933.19	-3798.93	-3739.4	-3647.99	-3702.4	-3557.51	-3449.26
			percent 1st	100	94.9981	96.312	95.3046	92.0514	90.609	88.394	89.7126	86.2017	83.5786
No	0.1 Hz	2019_04_16_0000	raw	-1621.4	-1417.72	-1336.96	-1317.48	-1318.25	-1268.02	-1264.46	-1315.42	-1270.77	-1246.37
			percent 1st	100	87.4378	82.4573	81.2556	81.3032	78.205	77.9855	81.1288	78.3746	76.8701
No	0.1 Hz	2019_04_16_0002	raw	-3191.54	-3084.1	-2941.84	-3004.8	-3164.04	-3443.86	-2961.98	-2929.03	-3040.19	-3043.56
			percent 1st	100	96.6334	92.1763	94.1489	99.1383	107.906	92.8073	91.7749	95.2578	95.3633
No	0.1 Hz	2019_04_16_0007	raw	-3897.34	-3638.5	-3593.11	-3724.3	-3506.1	-3633.74	-3588.24	-3572.28	-3570.62	-3635.61
			percent 1st	100	93.3586	92.1939	95.5599	89.9613	93.2364	92.0688	91.6594	91.6167	93.2842
No	0.1 Hz	2019_04_17_0001	raw	-5591.56	-5116.7	-4887.21	-4801	-4822.73	-4735.61	-4678.78	-4538.43	-4626	-4442.1
			percent 1st	100	91.5075	87.4034	85.8616	86.2502	84.6921	83.6758	81.1656	82.7319	79.4429
No	0.1 Hz	2019_04_19_0001	raw	-1286	-1053.09	-1095.26	-1141.03	-1098.92	-1172.75	-1148.9	-1936.96	-1157.24	-1096.67
			percent 1st	100	81.8886	85.1678	88.7271	85.4522	91.1931	89.3386	150.619	89.9871	85.2775
No	0.1 Hz	2019_04_17_0004	raw	-4619.67	-4224.55	-4221.44	-4242.14	-4145.04	-4190.36	-4099.53	-4185.21	-4140.49	-4132.12
			percent 1st	100	91.447	91.3798	91.8279	89.726	90.7069	88.7408	90.5956	89.6275	89.4464
No	0.1 Hz	2019_04_17_0005	raw	-3739.31	-3409.86	-3041.89	-3236.45	-3137.05	-3199.95	-3198.36	-3125.52	-3348.92	-3248.93
			percent 1st	100	91.1897	81.349	86.552	83.894	85.576	85.5334	83.5855	89.5598	86.8858
No	0.1 Hz	2019_04_17_0006	raw	-3908.91	-3568.51	-3466.55	-3389.06	-3366.19	-3280.78	-3177.6	-3159.26	-3052.97	-3053.52
			percent 1st	100	91.2917	88.6833	86.7008	86.1157	83.9309	81.2911	80.8219	78.1028	78.1169
No	0.1 Hz	2019_04_17_0007	raw	-3871.44	-3572.5	-3424.84	-3296.26	-3267.44	-3148.77	-3127.4	-3128.83	-3051.84	-3048.72
			percent 1st	100	92.2782	88.4642	85.1429	84.3986	81.3332	80.7812	80.8182	78.8297	78.749
No	0.1 Hz	2019_04_19_0000	raw	-3432.38	-3305.74	-3045.42	-3015.29	-2830.99	-2940.08	-2965.19	-2836.66	-2886.23	-2734.66
			percent 1st	100	96.3104	88.7261	87.8484	82.4789	85.6572	86.3886	82.6441	84.0883	79.6725
No	0.1 Hz	2019_04_19_0002	raw	-3823.93	-3473.9	-3529.6	-3446.63	-3549.46	-3572.27	-3521.02	-3545.92	-3668.74	-3466.96
			percent 1st	100	90.8465	92.303	90.1334	92.8222	93.419	92.0786	92.7297	95.9417	90.6649
