# Supplementary material for: Spontaneous and evoked neurotransmission are partially segregated at inhibitory synapses
Source: eLife. 2020 May 13;9:e52852. doi: 10.7554/eLife.52852 (PMC7250572; doi:10.7554/eLife.52852)
Supplement: Figure 2—source data 1. [file elife-52852-fig2-data1.xlsx]

## Sheet: 2B
Calcium:	File Name:	Initial eIPSC peak amp (pA)
0.5 mM	2019_08_07_0007	-189.514
0.5 mM	2019_08_07_0008	-152.893
0.5 mM	2019_08_07_0009	-215.149
0.5 mM	2019_08_07_0010	-339.661
0.5 mM	2019_08_07_0011	-350.037
0.5 mM	2019_08_07_0012	-334.167
0.5 mM	2019_08_07_0013	-354.919
0.5 mM	2019_08_07_0014	-434.875
0.5 mM	2019_08_07_0015	-339.05
1 mM	2019_08_07_0016	-1979.68
1 mM	2019_08_07_0017	-2091.98
1 mM	2019_08_07_0018	-1914.98
1 mM	2019_08_07_0019	-903.625
1 mM	2019_08_07_0020	-871.277
1 mM	2019_08_07_0021	-867.615
1 mM	2019_08_07_0022	-1400.45
1 mM	2019_08_07_0023	-1387.63
1 mM	2019_08_07_0024	-1376.65
2 mM	2019_08_07_0001	-3692.32
2 mM	2019_08_07_0002	-3493.35
2 mM	2019_08_07_0003	-2898.86
2 mM	2019_08_07_0004	-2875.67
2 mM	2019_08_07_0005	-2773.74
2 mM	2019_08_07_0025	-2038.27
2 mM	2019_08_07_0026	-2066.35
2 mM	2019_08_07_0027	-1847.23
2 mM	2019_08_09_0007	-1994.93
8 mM	2017_08_26_0002	-2614.07
8 mM	2017_08_26_0004	-4837.35
8 mM	2017_08_28_0001	-1575.35
8 mM	2017_08_28_0003	-4449.58
8 mM	2017_08_28_0007	-4990.82
8 mM	2019_07_30_0013	-2502.75
8 mM	2019_07_30_0014	-2567.44
8 mM	2019_07_30_0015	-2274.48
8 mM	2019_07_30_0016	-3062.44

## Sheet: 2C
Measurements are individual evoked peak amplitudes (pA)
Example traces in 2A were taken from bolded files
			Stimulation number:
Calcium:	Frequency:	File Name:	1	2	P2/P1
0.5 mM	10 Hz	2019_08_07_0009	-215.149	-242.004	1.12482
0.5 mM	10 Hz	2019_08_07_0012	-334.167	-472.717	1.41461
0.5 mM	10 Hz	2019_08_07_0015	-339.05	-412.903	1.21782
0.5 mM	5 Hz	2019_08_07_0008	-152.893	-163.269	1.06786
0.5 mM	5 Hz	2019_08_07_0011	-350.037	-450.745	1.28771
0.5 mM	5 Hz	2019_08_07_0014	-434.875	-414.124	0.952281
0.5 mM	2 Hz	2019_08_07_0007	-189.514	-199.28	1.05153
0.5 mM	2 Hz	2019_08_07_0010	-339.661	-389.099	1.14555
0.5 mM	2 Hz	2019_08_07_0013	-354.919	-368.958	1.03955
1 mM	10 Hz	2019_08_07_0018	-1914.98	-1998.6	1.04367
1 mM	10 Hz	2019_08_07_0021	-867.615	-1053.77	1.21456
1 mM	10 Hz	2019_08_07_0024	-1376.65	-974.426	0.707825
1 mM	5 Hz	2019_08_07_0017	-2091.98	-1911.93	0.913931
1 mM	5 Hz	2019_08_07_0020	-871.277	-1044.01	1.19825
1 mM	5 Hz	2019_08_07_0023	-1387.63	-1196.59	0.862327
1 mM	2 Hz	2019_08_07_0016	-1979.68	-1891.78	0.955604
1 mM	2 Hz	2019_08_07_0019	-903.625	-867.615	0.960149
1 mM	2 Hz	2019_08_07_0022	-1400.45	-1391.3	0.993463
2 mM	10 Hz	2019_08_07_0005	-2773.74	-1506.04	0.542964
2 mM	10 Hz	2019_08_07_0027	-1847.23	-1030.58	0.557905
2 mM	5 Hz	2019_08_07_0002	-3493.35	-2477.11	0.709094
2 mM	5 Hz	2019_08_07_0004	-2875.67	-2123.72	0.738512
2 mM	5 Hz	2019_08_07_0026	-2066.35	-1370.54	0.66327
2 mM	2 Hz	2019_08_07_0001	-3692.32	-3009.34	0.815026
2 mM	2 Hz	2019_08_07_0003	-2898.86	-2477.11	0.854511
2 mM	2 Hz	2019_08_07_0025	-2038.27	-1625.67	0.797574
8 mM	10 Hz	2019_09_13_0002	-2109.07	-906.067	0.429605
8 mM	10 Hz	2019_09_13_0005	-2796.33	-712.585	0.254829
8 mM	10 Hz	2019_09_13_0008	-3299.87	-139.465	0.0422639
8 mM	10 Hz	2019_09_13_0011	-4856.26	-1684.88	0.346949
8 mM	5 Hz	2019_09_13_0001	-2239.07	-1044.62	0.466539
8 mM	5 Hz	2019_09_13_0004	-3025.82	-1410.22	0.466062
8 mM	5 Hz	2019_09_13_0007	-3700.26	-716.248	0.193567
8 mM	5 Hz	2019_09_13_0010	-5346.98	-3097.23	0.579248
8 mM	2 Hz	2019_09_13_0000	-2337.34	-1978.45	0.846455
8 mM	2 Hz	2019_09_13_0003	-3428.65	-2332.46	0.680285
8 mM	2 Hz	2019_09_13_0006	-4396.06	-1950.38	0.443665
8 mM	2 Hz	2019_09_13_0009	-5954.28	-4554.14	0.764851

## Sheet: 2D-main
Measurements are individual evoked peak amplitudes (pA)
			Time (s):
Calcium:	File name:		0	5	10	15	20	25	30	35	40	45	50	55	60	65	70	75	80	85	90	95	100	105	110	115	120	125	130	135	140	145	150	155	160	165	170	175	180	185	190	195	200	205	210	215	220	225	230
0.5 mM	2019_08_08_0002	raw	-150.909	-133.209	-119.781	-125.885	-110.931	-111.542	-95.0623	-69.7327	-76.1414	-99.6399	-44.7083	-55.9998	-66.0706	-37.6892	-51.1169	-57.8308	-57.5256	-30.9753	-35.8582	-34.0271	-40.4358	-34.6375	-37.0789	-31.8909	-27.3132	-29.4495	-31.5857	-31.2805	-33.4167	-28.8391	-23.3459	-35.8582	-19.6838	-27.0081	-20.2942	-19.6838	-22.4304	-19.3787	-17.5476	-24.2615	-22.7356	-18.4631	-20.5994	-16.3269	-16.9373	-16.9373	-14.4959
		% 1st pulse	100	88.271	79.3731	83.4176	73.5086	73.913	62.9929	46.2083	50.455	66.0263	29.6259	37.1082	43.7816	24.9747	33.8726	38.3215	38.1193	20.5258	23.7614	22.548	26.7947	22.9525	24.5703	21.1325	18.0991	19.5147	20.9302	20.728	22.1436	19.1102	15.4702	23.7614	13.0435	17.8969	13.4479	13.0435	14.8635	12.8413	11.6279	16.0768	15.0657	12.2346	13.6502	10.819	11.2235	11.2235	9.60566
0.5 mM	2019_08_09_0010	raw	-533.142	-488.586	-470.276	-494.69	-433.655	-440.979	-419.006	-407.41	-351.257	-317.078	-315.247	-329.895	-351.257	-284.119	-296.936	-263.977	-245.667	-300.598	-237.122	-242.615	-210.876	-210.876	-217.59	-214.539	-182.19	-185.852	-198.059	-179.138	-171.204	-200.5	-173.035	-171.204	-163.879	-137.634	-149.231	-149.841	-137.024	-131.531
		% 1st pulse	100	91.6428	88.2084	92.7876	81.3394	82.7132	78.5919	76.4167	65.8844	59.4734	59.1299	61.8775	65.8844	53.2914	55.6955	49.5135	46.079	56.3824	44.4762	45.5066	39.5535	39.5535	40.8128	40.2404	34.1729	34.8598	37.1494	33.6005	32.1122	37.6073	32.4556	32.1122	30.7384	25.8157	27.9908	28.1053	25.7012	24.6709
0.5 mM	2019_08_09_0011	raw	-440.979	-357.971	-349.426	-240.173	-249.939	-185.242	-164.49	-143.738	-149.841	-137.634	-140.686	-105.896	-108.948	-127.869	-112.61	-101.013	-89.4165	-124.817	-115.051	-95.52	-72.3267	-89.4165	-84.5337	-86.3647	-91.2476	-77.8198	-96.1304	-70.4956	-81.4819	-78.4302	-91.8579	-82.0923	-68.0542	-99.7925	-114.441	-99.1821	-91.8579	-101.013	-114.441	-86.9751	-83.9233	-98.5718	-68.0542	-90.0269	-94.2993	-76.5991	-65.0024
		% 1st pulse	100	81.1765	79.2388	54.4637	56.6782	42.0069	37.301	32.5952	33.9792	31.2111	31.9031	24.0138	24.7059	28.9965	25.5363	22.9066	20.2768	28.3045	26.09	21.6609	16.4014	20.2768	19.1696	19.5848	20.692	17.6471	21.7993	15.9862	18.4775	17.7855	20.8304	18.6159	15.4325	22.6298	25.9516	22.4913	20.8304	22.9066	25.9516	19.7232	19.0311	22.3529	15.4325	20.4152	21.3841	17.3702	14.7405
0.5 mM	2019_08_09_0012	raw	-270.081	-233.459	-256.653	-223.083	-202.942	-184.631	-177.307	-192.566	-166.321	-163.269	-140.076	-146.179	-172.424	-138.855	-131.531	-143.738	-124.207	-134.583	-135.193	-110.168	-113.831	-105.286	-105.896	-105.896	-108.337	-122.375	-93.689	-89.4165	-102.844	-78.4302	-93.689	-89.4165	-92.4683	-85.7544	-86.3647	-106.506	-85.144	-73.5474	-78.4302	-78.4302	-81.4819	-79.0405	-72.937	-68.6646	-62.561	-83.313	-68.6646
		% 1st pulse	100	86.4407	95.0282	82.5989	75.1412	68.3616	65.6497	71.2994	61.5819	60.452	51.8644	54.1243	63.8418	51.4124	48.7006	53.2203	45.9887	49.8305	50.0565	40.791	42.1469	38.9831	39.209	39.209	40.113	45.3107	34.6893	33.1073	38.0791	29.0395	34.6893	33.1073	34.2373	31.7514	31.9774	39.435	31.5254	27.2316	29.0395	29.0395	30.1695	29.2655	27.0056	25.4237	23.1638	30.8475	25.4237
0.5 mM	2019_08_13_0001	raw	-232.697	-219.269	-254.364	-231.476	-199.738	-240.326	-240.936	-234.222	-214.081	-195.77	-130.463	-178.986	-188.751	-162.506	-149.384	-208.282	-149.994	-162.811	-148.468	-138.397	-125.885	-111.237	-117.645	-131.073	-120.697	-125.275	-139.008	-137.482	-148.468	-110.931	-121.918	-131.378	-88.3484	-99.6399	-88.0432	-113.678	-109.1	-95.3674	-67.5964	-82.2449	-101.776	-100.555	-83.1604	-62.1033	-89.5691	-74.9207	-80.1086
		% 1st pulse	100	94.2295	109.311	99.4754	85.8361	103.279	103.541	100.656	92	84.1311	56.0656	76.918	81.1148	69.8361	64.1967	89.5082	64.459	69.9672	63.8033	59.4754	54.0984	47.8033	50.5574	56.3279	51.8689	53.8361	59.7377	59.082	63.8033	47.6721	52.3934	56.459	37.9672	42.8197	37.8361	48.8525	46.8852	40.9836	29.0492	35.3443	43.7377	43.2131	35.7377	26.6885	38.4918	32.1967	34.4262
0.5 mM	2019_08_13_0002	raw	-758.362	-811.462	-673.523	-618.591	-650.33	-715.637	-714.417	-628.357	-582.581	-648.499	-569.153	-560.608	-522.156	-595.398	-625.916	-520.935	-563.049	-475.769	-489.197	-560.608	-544.128	-478.21	-536.194	-492.859	-491.028	-388.489	-426.331	-487.976	-450.745	-484.924	-373.84	-506.897	-398.865	-415.955	-445.251	-445.862	-412.903	-439.148	-434.265	-401.917	-422.058	-437.927	-425.11	-475.769	-387.878	-356.75	-498.352
		% 1st pulse	100	107.002	88.8129	81.5694	85.7545	94.3662	94.2052	82.8571	76.8209	85.5131	75.0503	73.9235	68.8531	78.5111	82.5352	68.6922	74.2455	62.7364	64.507	73.9235	71.7505	63.0584	70.7042	64.9899	64.7485	51.2274	56.2173	64.3461	59.4366	63.9437	49.2958	66.841	52.5956	54.8491	58.7123	58.7928	54.4467	57.9074	57.2636	52.998	55.6539	57.7465	56.0563	62.7364	51.1469	47.0423	65.7143
0.5 mM	2019_09_11_0000	raw	-733.337	-533.752	-529.48	-619.202	-430.603	-503.845	-415.344	-447.693	-417.175	-487.366	-419.006	-386.658	-411.682	-396.423	-426.331	-401.917	-392.151	-402.527	-406.189	-337.219	-322.571	-284.119	-288.391	-241.394	-223.694	-252.991	-235.291	-238.342	-230.408	-193.176	-222.473	-207.825	-192.566	-198.669	-226.135	-177.307	-204.773	-173.035	-161.438	-187.683	-172.424	-195.007	-132.141	-154.724	-154.114	-185.852	-164.49
		% 1st pulse	100	72.784	72.2014	84.4361	58.7183	68.7058	56.6375	61.0487	56.8872	66.4586	57.1369	52.7258	56.1382	54.0574	58.1357	54.8065	53.4748	54.8897	55.3891	45.9842	43.9867	38.7432	39.3258	32.9172	30.5035	34.4985	32.0849	32.501	31.4191	26.3421	30.3371	28.3396	26.2588	27.0911	30.8365	24.1781	27.9234	23.5955	22.0141	25.593	23.5123	26.5918	18.0191	21.0986	21.0154	25.3433	22.4303
0.5 mM	2019_09_11_0001	raw	-700.989	-669.25	-617.981	-580.75	-569.153	-674.744	-552.063	-473.938	-528.87	-423.889	-458.679	-489.807	-370.789	-448.303	-429.993	-415.955	-342.102	-431.824	-400.696	-386.658	-382.996	-432.434	-361.633	-353.699	-340.271	-314.636	-319.519	-299.988	-373.84	-267.639	-280.457	-321.96	-252.38	-284.729	-209.045	-231.628	-218.201	-275.574	-221.252	-259.094	-195.007	-212.097	-212.708	-243.835	-223.694	-151.672	-193.787
		% 1st pulse	100	95.4724	88.1585	82.8472	81.1929	96.256	78.7549	67.6099	75.4462	60.4702	65.4332	69.8737	52.8951	63.953	61.3409	59.3383	48.8028	61.6021	57.1615	55.1589	54.6365	61.6892	51.589	50.4571	48.5416	44.8846	45.5812	42.7949	53.3304	38.1802	40.0087	45.9295	36.0035	40.6182	29.8215	33.0431	31.1276	39.3121	31.5629	36.9613	27.8189	30.2569	30.3439	34.7845	31.9112	21.6369	27.6448
0.5 mM	2019_09_11_0002	raw	-1296.73	-1081.89	-1007.43	-912.211	-853.619	-807.844	-757.796	-730.937	-700.423	-661.971	-715.685	-526.478	-526.477	-589.951	-556.386	-483.138	-454.457	-541.731	-455.671	-442.248	-417.836	-427.601	-387.315	-384.878	-402.579	-342.154	-350.088	-295.153	-295.767	-291.501	-253.655	-280.511	-264.028	-258.535	-264.65	-254.268	-255.485	-237.174	-223.144	-239.618	-209.097	-207.883	-218.866	-223.749	-216.421	-237.793	-203.609
		% 1st pulse	100	83.4318	77.6899	70.3469	65.8285	62.2984	58.4389	56.3676	54.0145	51.0491	55.1914	40.6003	40.6003	45.4952	42.9067	37.2581	35.0463	41.7766	35.14	34.1048	32.2222	32.9753	29.8686	29.6806	31.0456	26.3858	26.9977	22.7613	22.8086	22.4797	19.5611	21.6321	20.361	19.9374	20.409	19.6083	19.7022	18.2901	17.2082	18.4786	16.1249	16.0313	16.8783	17.2549	16.6897	18.3379	15.7017
0.5 mM	2019_09_11_0003	raw	-439.758	-406.189	-445.251	-338.44	-302.429	-293.274	-315.247	-337.219	-263.977	-231.628	-254.211	-255.432	-251.77	-223.083	-212.097	-176.086	-246.887	-252.38	-225.525	-201.721	-165.1	-174.866	-200.5	-175.476	-156.555	-188.904	-162.048	-158.386	-165.71	-161.438	-134.583	-174.866	-150.452	-112	-121.765	-126.648	-107.117	-105.286	-117.493	-126.038	-126.038	-108.337	-104.065	-127.258	-132.141	-130.92	-121.765
		% 1st pulse	100	92.3664	101.249	76.9604	68.7717	66.6898	71.6863	76.6829	60.0278	52.6718	57.8071	58.0847	57.2519	50.7287	48.2304	40.0416	56.1416	57.3907	51.2838	45.8709	37.5434	39.7641	45.5933	39.9028	35.6003	42.9563	36.8494	36.0167	37.6822	36.7106	30.6037	39.7641	34.2124	25.4684	27.6891	28.7994	24.3581	23.9417	26.7176	28.6607	28.6607	24.6357	23.6641	28.9382	30.0486	29.771	27.6891
1 mM	2019_08_08_0004	raw	-865.631	-771.332	-655.365	-583.038	-570.221	-526.581	-479.279	-470.734	-406.647	-363.007	-399.628	-332.184	-340.729	-295.258	-321.503	-279.999	-297.394	-264.74	-258.942	-249.481	-231.476	-240.631	-226.898	-207.672	-228.729	-207.367	-203.094	-188.751	-190.887	-169.22	-168.61	-169.525	-168.915	-177.155	-154.266	-149.384	-142.365	-153.351	-153.656	-147.247	-134.43	-130.768	-120.697	-144.501	-141.449	-127.716	-131.073
		% 1st pulse	100	89.1063	75.7095	67.3541	65.8734	60.832	55.3675	54.3804	46.9769	41.9355	46.166	38.3748	39.3619	34.1089	37.1408	32.3462	34.3557	30.5835	29.9136	28.8207	26.7407	27.7983	26.2119	23.9908	26.4234	23.9556	23.462	21.805	22.0518	19.5487	19.4782	19.584	19.5135	20.4654	17.8213	17.2572	16.4463	17.7155	17.7507	17.0104	15.5297	15.1066	13.9432	16.6931	16.3406	14.7541	15.1419
1 mM	2019_08_08_0005	raw	-1647.49	-1348.72	-1212.01	-1090.85	-987.701	-869.293	-880.585	-829.01	-767.975	-686.798	-646.21	-621.796	-591.583	-553.741	-539.398	-495.453	-526.886	-463.409	-436.249	-418.549	-415.192	-406.952	-369.415	-362.701	-382.233	-359.65	-336.151	-334.015	-310.516	-294.342	-295.258	-289.154	-282.135	-267.487	-273.895	-249.481	-264.13	-248.26	-239.41	-236.969	-229.34	-202.179	-224.457	-209.808	-189.056	-205.536	-198.517
		% 1st pulse	100	81.8653	73.5667	66.2128	59.9518	52.7647	53.45	50.3195	46.6148	41.6875	39.2239	37.742	35.9081	33.6112	32.7406	30.0732	31.9811	28.1282	26.4796	25.4052	25.2014	24.7013	22.4229	22.0154	23.2009	21.8301	20.4038	20.2742	18.8478	17.8661	17.9216	17.5512	17.1251	16.236	16.625	15.1431	16.0322	15.069	14.5318	14.3836	13.9205	12.2719	13.6242	12.735	11.4754	12.4757	12.0496
1 mM	2019_08_09_0008	raw	-493.469	-564.27	-486.755	-414.124	-377.502	-334.167	-365.295	-335.388	-259.705	-297.546	-265.808	-256.042	-226.135	-277.405	-242.004	-235.291	-229.187	-218.811	-224.304	-227.356	-227.356	-192.566	-182.19	-176.086	-142.517	-171.814	-200.5	-137.634	-151.672	-139.465	-153.503	-136.414	-133.362	-146.179	-140.076	-134.583	-124.817	-106.506	-116.272	-99.7925	-125.427	-118.713	-124.207	-110.168	-97.3511	-121.155	-135.193
		% 1st pulse	100	114.348	98.6395	83.9208	76.4997	67.718	74.026	67.9654	52.6283	60.2968	53.8652	51.8862	45.8256	56.2152	49.0414	47.6809	46.444	44.3414	45.4545	46.073	46.073	39.0229	36.9202	35.6834	28.8806	34.8176	40.6308	27.8912	30.7359	28.2622	31.107	27.6438	27.0254	29.6228	28.3859	27.2727	25.2938	21.5832	23.5622	20.2226	25.4174	24.0569	25.1701	22.3253	19.7279	24.5516	27.3964
1 mM	2019_08_09_0009	raw	-1903.99	-1417.54	-1340.03	-1246.03	-984.802	-896.912	-861.511	-787.659	-732.727	-746.155	-713.196	-643.616	-588.684	-590.515	-559.387	-536.804	-550.232	-498.962	-462.341	-457.458	-415.344	-397.644	-379.333	-392.151	-372.62	-358.582	-328.674	-326.233	-314.636	-299.988	-316.467	-306.091	-259.094	-279.236	-263.977	-278.625	-258.484	-264.587	-251.77	-251.16	-258.484	-223.694	-248.718	-244.446	-253.601	-209.656	-216.98
		% 1st pulse	100	74.451	70.3799	65.4432	51.723	47.1069	45.2476	41.3688	38.4837	39.189	37.4579	33.8035	30.9184	31.0146	29.3797	28.1936	28.8989	26.2061	24.2827	24.0263	21.8144	20.8848	19.9231	20.5962	19.5704	18.8331	17.2624	17.1342	16.5251	15.7557	16.6213	16.0763	13.6079	14.6658	13.8644	14.6338	13.5759	13.8965	13.2233	13.1912	13.5759	11.7487	13.063	12.8386	13.3194	11.0114	11.3961
1 mM	2019_08_13_0004	raw	-1844.18	-1842.35	-1659.85	-1551.82	-1678.77	-1571.96	-1667.18	-1523.74	-1666.56	-1504.21	-1575.62	-1424.87	-1363.22	-1209.41	-1181.95	-1240.54	-1260.07	-1060.49	-1133.12	-1018.98	-1113.59	-1015.32	-1113.59	-1075.13	-1138	-904.846	-1185	-885.925	-888.367	-985.413	-885.925	-845.032	-913.391	-920.715	-824.89	-962.219	-768.127	-735.779	-726.013	-706.482	-712.585	-797.424	-764.465	-591.736
	patch went bad after event 44	% 1st pulse	100	99.9007	90.005	84.1469	91.0309	85.2391	90.4021	82.6245	90.369	81.5654	85.4377	77.2629	73.9202	65.58	64.0907	67.2679	68.327	57.5046	61.443	55.254	60.3839	55.0554	60.3839	58.2989	61.7078	49.065	64.2562	48.0391	48.1714	53.4337	48.0391	45.8216	49.5284	49.9255	44.7294	52.1761	41.6515	39.8974	39.3679	38.3088	38.6397	43.2401	41.4529	32.0867
1 mM	2019_08_13_0005	raw	-2874.45	-2492.98	-2170.72	-1952.21	-2089.54	-2051.09	-1916.2	-1884.46	-1733.7	-1726.99	-1691.59	-1651.31	-1589.05	-1571.96	-1436.46	-1459.66	-1339.42	-1330.26	-1361.39	-1326.6	-1286.32	-1241.76	-1266.17	-1269.23	-1191.1	-1167.3	-1254.58	-1144.71	-1112.98	-1040.95	-1038.51	-1012.27	-1034.85	-1010.44	-964.05	-989.075	-976.257	-1014.71	-997.009	-948.792	-868.835	-934.753	-969.543	-895.081	-891.418	-929.871	-843.201
		% 1st pulse	100	86.729	75.5176	67.9159	72.6935	71.3558	66.6631	65.559	60.3143	60.0807	58.8491	57.4477	55.2819	54.6873	49.9735	50.7803	46.5973	46.2788	47.3617	46.1514	44.75	43.1999	44.0493	44.1554	41.4375	40.6094	43.6458	39.8238	38.7196	36.214	36.1291	35.2161	36.0017	35.1524	33.5386	34.4092	33.9633	35.301	34.6852	33.0078	30.2261	32.5194	33.7297	31.1392	31.0118	32.3495	29.3343
1 mM	2019_09_10_0003	raw	-2281.19	-1948.55	-1848.45	-1502.38	-1421.81	-1250.31	-1139.22	-1037.29	-1043.4	-1217.35	-874.939	-820.007	-781.555	-679.626	-630.188	-577.698	-594.788	-522.156	-493.469	-536.804	-461.731	-484.314	-448.914	-406.799	-389.099	-335.388	-400.696	-329.285	-287.17	-312.195	-298.767	-296.326	-270.691	-251.16	-242.004	-221.252	-215.759	-226.746	-236.511	-281.677	-231.628	-206.604	-217.59	-216.37	-201.111	-204.163	-216.98
		% 1st pulse	100	85.4181	81.0301	65.8595	62.3278	54.8094	49.9398	45.4716	45.7391	53.3645	38.3545	35.9465	34.2609	29.7926	27.6254	25.3244	26.0736	22.8896	21.6321	23.5318	20.2408	21.2308	19.6789	17.8328	17.0569	14.7023	17.5652	14.4348	12.5886	13.6856	13.097	12.99	11.8662	11.01	10.6087	9.699	9.45819	9.9398	10.3679	12.3478	10.1538	9.05686	9.53846	9.48495	8.81605	8.94983	9.51171
1 mM	2019_09_11_0004	raw	-1515.2	-1369.32	-1072.69	-1249.69	-1217.35	-1038.51	-1055.6	-885.315	-868.225	-970.764	-860.901	-797.424	-841.37	-783.997	-791.931	-786.438	-736.389	-742.493	-613.098	-578.308	-660.095	-596.008	-619.202	-581.36	-575.256	-563.66	-575.256	-518.494	-447.083	-492.249	-517.273	-466.614	-480.042	-424.5	-466.003	-447.083	-420.837	-433.044	-390.32	-381.165	-380.554	-356.75	-403.748	-367.126	-326.843	-367.126	-402.527
		% 1st pulse	100	90.3726	70.7956	82.4773	80.3424	68.5398	69.6677	58.429	57.3011	64.0685	56.8177	52.6284	55.5287	51.7422	52.2659	51.9033	48.6002	49.003	40.4632	38.1672	43.565	39.3353	40.8661	38.3686	37.9658	37.2004	37.9658	34.2195	29.5065	32.4874	34.139	30.7956	31.6818	28.0161	30.7553	29.5065	27.7744	28.5801	25.7603	25.1561	25.1158	23.5448	26.6465	24.2296	21.571	24.2296	26.566
1 mM	2019_09_11_0005	raw	-1346.79	-1050.77	-848.134	-811.516	-823.719	-816.399	-603.991	-669.304	-538.076	-562.492	-538.077	-509.392	-456.288	-383.656	-428.216	-423.334	-349.477	-353.142	-345.206	-301.877	-331.173	-308.585	-278.676	-303.088	-257.32	-243.89	-290.271	-220.087	-247.553	-242.671	-235.957	-221.926	-213.983	-232.29	-203	-210.941	-201.171	-204.834	-178.589	-180.421	-166.997	-176.761	-173.091	-145.621	-137.686	-179.198	-157.217
		% 1st pulse	100	78.0204	62.9745	60.2556	61.1616	60.6181	44.8467	49.6962	39.9525	41.7654	39.9525	37.8227	33.8797	28.4867	31.7953	31.4329	25.9489	26.221	25.6317	22.4146	24.5898	22.9127	20.6919	22.5045	19.1062	18.109	21.5528	16.3416	18.381	18.0185	17.52	16.4782	15.8884	17.2477	15.0729	15.6625	14.9371	15.2091	13.2603	13.3964	12.3996	13.1246	12.8521	10.8125	10.2233	13.3056	11.6734
2 mM	2019_07_30_0009	raw	-3083.19	-2375.18	-2117.61	-1921.08	-1384.58	-1401.06	-1448.06	-1037.9	-859.68	-998.84	-1017.76	-702.209	-795.593	-525.208	-715.027	-631.409	-549.622	-480.652	-664.978	-373.84	-525.208	-378.723	-408.02	-438.538	-412.903	-391.541	-313.416	-367.737	-341.492	-334.167	-239.563	-331.726	-269.47	-259.705	-278.625	-287.17	-263.977	-262.146	-168.152	-181.58	-169.983	-555.115	-234.68	-193.787	-216.98	-198.059	-196.228
		% 1st pulse	100	77.0365	68.6826	62.3082	44.9075	45.4419	46.9662	33.6633	27.8828	32.3963	33.01	22.7754	25.8042	17.0345	23.1911	20.4791	17.8264	15.5894	21.5679	12.1251	17.0345	12.2835	13.2337	14.2235	13.3921	12.6992	10.1653	11.9272	11.0759	10.8384	7.76997	10.7592	8.73998	8.42324	9.03692	9.31407	8.56181	8.50243	5.45383	5.88934	5.51321	18.0046	7.6116	6.28526	7.03751	6.42383	6.36445
2 mM	2019_07_30_0010	raw	-2981.26	-2649.84	-2455.75	-2250.67	-2093.2	-1910.1	-1752.62	-1663.51	-1539	-1419.37	-1376.04	-1266.78	-1219.18	-1147.77	-1030.58	-1006.16	-963.44	-939.026	-915.833	-826.111	-784.607	-790.71	-711.365	-704.041	-695.496	-664.368	-606.384	-570.984	-588.684	-550.232	-528.259	-536.804	-523.987	-508.118	-496.521	-357.971	-454.407	-462.952	-427.551	-419.617	-421.448	-417.786	-415.955	-402.527	-382.996	-376.282	-359.192
		% 1st pulse	100	88.8832	82.3728	75.4939	70.2119	64.07	58.788	55.799	51.6225	47.6098	46.1562	42.4916	40.8947	38.4993	34.5685	33.7496	32.3165	31.4976	30.7196	27.7101	26.3179	26.5227	23.8612	23.6155	23.3289	22.2848	20.3399	19.1524	19.7461	18.4563	17.7193	18.0059	17.576	17.0437	16.6547	12.0074	15.2421	15.5287	14.3413	14.0751	14.1366	14.0137	13.9523	13.5019	12.8468	12.6216	12.0483
2 mM	2019_07_30_0011	raw	-2188.42	-1755.07	-1684.88	-1473.08	-1376.65	-1175.84	-1123.35	-1037.29	-987.854	-920.715	-799.255	-776.062	-709.534	-722.961	-668.03	-614.319	-571.594	-523.987	-527.649	-517.883	-489.197	-458.679	-411.682	-379.944	-388.489	-339.661	-339.661	-375.671	-349.426	-291.443	-264.587	-298.157	-284.729	-264.587	-223.083	-268.86	-199.28	-233.459	-251.77	-203.552	-187.683	-207.825	-204.773	-191.956	-185.242	-177.917	-158.386
		% 1st pulse	100	80.198	76.9907	67.3128	62.9061	53.7303	51.3318	47.3992	45.1401	42.0722	36.5221	35.4623	32.4223	33.0358	30.5257	28.0714	26.1191	23.9437	24.111	23.6648	22.3539	20.9594	18.8119	17.3616	17.7521	15.5208	15.5208	17.1664	15.9671	13.3175	12.0904	13.6243	13.0107	12.0904	10.1938	12.2856	9.10612	10.668	11.5047	9.30135	8.57621	9.49658	9.35713	8.77144	8.46465	8.12997	7.23748
2 mM	2019_07_30_0012	raw	-3291.93	-2876.89	-2566.83	-2413.02	-2217.1	-1997.99	-1903.38	-1916.81	-1699.52	-1517.03	-1521.3	-1372.99	-1302.19	-1218.57	-1091.61	-1158.14	-1043.4	-996.399	-933.533	-943.909	-888.367	-816.345	-771.79	-747.375	-711.975	-664.978	-688.782	-620.422	-614.929	-563.049	-580.75	-511.169	-544.739	-517.273	-494.08	-510.559	-439.148	-425.11	-431.213	-423.279	-395.813	-378.113	352.478	-356.75	351.257	-358.582	348.206
		% 1st pulse	100	87.3922	77.9735	73.3012	67.3496	60.6934	57.8196	58.2275	51.627	46.0832	46.213	41.7076	39.5569	37.0168	33.1603	35.1812	31.6956	30.2679	28.3582	28.6734	26.9862	24.7984	23.4449	22.7033	21.6279	20.2002	20.9233	18.8468	18.6799	17.1039	17.6416	15.528	16.5477	15.7134	15.0088	15.5094	13.3401	12.9137	13.0991	12.8581	12.0237	11.486	-10.7073	10.8371	-10.6703	10.8927	-10.5775
2 mM	2019_08_08_0006	raw	-489.96	-424.652	-316.01	-254.059	-232.391	-222.015	-189.667	-113.983	-108.795	-154.266	-96.5881	-120.697	-88.3484	-106.354	-121.613	-74.3103	-71.2585	-63.324	-50.2014	-89.8743	-84.3811	-72.4792	-68.512	-74.3103	-35.2478	-53.2532	-46.5393	-45.0134	-35.553	-42.2668	-54.1687	-37.0789	-36.4685	-55.6946	-34.9426	-50.2014	-43.7927	-31.8909	-26.7029	-46.2341	-41.9617	-40.4358	-26.0925	-35.2478	-28.8391	-10.2234	-10.8337
		% 1st pulse	100	86.6708	64.497	51.853	47.4307	45.313	38.7107	23.2638	22.2049	31.4855	19.7135	24.6341	18.0318	21.7066	24.8209	15.1666	14.5438	12.9243	10.246	18.3432	17.222	14.7929	13.9832	15.1666	7.19402	10.8689	9.4986	9.18717	7.25631	8.6266	11.0557	7.56774	7.44316	11.3672	7.13173	10.246	8.93803	6.50888	5.45002	9.43631	8.56431	8.25288	5.32544	7.19402	5.88602	2.08658	2.21115
2 mM	2019_08_09_0006	raw	-2137.76	-1870.42	-1616.52	-1341.25	-1216.13	-1186.83	-955.505	-966.492	-820.618	-829.773	-745.544	-729.065	-669.861	-576.477	-557.556	-541.687	-488.586	-457.458	-449.524	-427.551	-379.333	-456.238	-415.344	-367.737	-403.137	-462.952	-417.175	-352.478	-391.541	-461.731	-333.557	-310.974	-357.971	-327.454	-315.857	-273.743	-350.647	-245.056	-308.533	-282.288	-233.459	-244.446	-290.222	-285.339	-264.587	-245.056	-284.729
		% 1st pulse	100	87.4946	75.6174	62.7409	56.8879	55.5175	44.6966	45.2106	38.3869	38.8151	34.8751	34.1042	31.3348	26.9665	26.0814	25.339	22.8551	21.399	21.0278	20	17.7445	21.3419	19.429	17.202	18.858	21.656	19.5146	16.4882	18.3155	21.5989	15.6031	14.5468	16.7452	15.3176	14.7752	12.8051	16.4026	11.4632	14.4325	13.2049	10.9208	11.4347	13.576	13.3476	12.3769	11.4632	13.3191
2 mM	2019_08_09_0007	raw	-1994.93	-1661.68	-1484.07	-1448.67	-1286.32	-1269.23	-1089.78	-1069.64	-969.543	-947.571	-923.157	-844.421	-821.228	-780.945	-769.348	-696.106	-698.547	-653.381	-614.929	-564.27	-580.75	-549.622	-545.349	-531.921	-505.676	-472.717	-453.186	-467.834	-448.914	-476.99	-555.725	-497.131	-498.352	-476.99	-455.627	-438.538	-458.069	-425.11	-429.993	-398.254	-393.982	-401.306	-384.827	-387.268	-364.685	-372.009	-352.478
		% 1st pulse	100	83.2951	74.3919	72.6174	64.4791	63.6225	54.6275	53.6179	48.6003	47.4989	46.275	42.3283	41.1657	39.1464	38.5651	34.8937	35.0161	32.752	30.8245	28.2851	29.1112	27.5509	27.3367	26.6636	25.348	23.6959	22.7168	23.4511	22.5027	23.9101	27.8568	24.9197	24.9809	23.9101	22.8392	21.9826	22.9616	21.3095	21.5542	19.9633	19.7491	20.1163	19.2902	19.4126	18.2806	18.6477	17.6687
2 mM	2019_08_13_0006	raw	-3819.27	-3276.06	-3127.14	-2847.6	-2753.6	-2734.07	-2636.41	-2389.83	-2497.25	-2328.19	-2258	-2221.98	-2125.55	-2105.41	-1999.21	-1982.73	-1929.63	-1871.64	-1875.31	-1875.31	-1799.62	-1730.04	-1695.25	-1637.88	-1509.7	-1577.45	-1545.72	-1510.93	-1447.45	-1492.61	-1461.49	-1387.02	-1446.23	-1379.09	-1325.38	-1340.64	-1274.72	-1253.36	-1244.81	-1244.2	-1223.45	-1192.32	-1187.44	-1141.05	-1147.77	-1047.67	-1064.15
		% 1st pulse	100	85.7771	81.8777	74.5585	72.0975	71.5861	69.0292	62.5729	65.3855	60.9588	59.1211	58.1782	55.6532	55.1258	52.3452	51.9137	50.5234	49.0052	49.1011	49.1011	47.1195	45.2976	44.3867	42.8845	39.5286	41.3024	40.4714	39.5605	37.8985	39.0811	38.2661	36.3164	37.8666	36.1087	34.7024	35.1019	33.3759	32.8166	32.5929	32.5769	32.0336	31.2185	31.0907	29.8761	30.0519	27.4311	27.8626
2 mM	2019_08_13_0007	raw	-3080.14	-2168.88	-2044.37	-1996.77	-1835.02	-1652.53	-1640.32	-1528.63	-1526.18	-1316.83	-1271.67	-1260.07	-1232.6	-1285.71	-1123.35	-1093.44	-1029.97	-1079.41	-1028.14	-1019.59	-949.402	-919.495	-1012.27	-907.898	-867.004	-912.17	-822.449	-838.928	-766.907	-767.517	-758.362	-733.337	-795.593	-740.662	-663.757	-655.212	-708.313	-652.161	-647.278	-680.237	-651.55	-569.763	-587.463	-600.891	-554.504	-558.167	-562.439
		% 1st pulse	100	70.4151	66.3727	64.8271	59.5759	53.651	53.2547	49.6285	49.5492	42.7524	41.286	40.9095	40.0178	41.7418	36.4708	35.4999	33.439	35.0441	33.3796	33.1022	30.8233	29.8524	32.8644	29.4759	28.1482	29.6146	26.7017	27.2367	24.8984	24.9183	24.621	23.8086	25.8298	24.0464	21.5496	21.2722	22.9961	21.1731	21.0146	22.0846	21.1533	18.498	19.0726	19.5086	18.0026	18.1215	18.2602
2 mM	2019_08_13_0013	raw	-3982.85	-3507.39	-3230.9	-3083.19	-2893.98	-2735.29	-2671.2	-2557.07	-2442.32	-2421.57	-2270.81	-2183.53	-2100.52	-2192.08	-2050.48	-1987.61	-1954.04	-1937.56	-1874.69	-1779.48	-1800.84	-1722.11	-1694.64	-1667.79	-1613.46	-1603.09	-1518.86	-1562.19	-1502.99	-1446.23	-1439.51	-1380.92	-1369.32	-1363.22	-1327.82	-1292.42	-1302.19	-1314.39	-1266.78	-1296.08	-1266.17	-1220.4	-1228.33	-1181.95	-1157.53	-1161.8	-1154.48
		% 1st pulse	100	88.0622	81.1202	77.4117	72.6611	68.6767	67.0677	64.202	61.321	60.7999	57.0148	54.8234	52.7393	55.0379	51.4826	49.9042	49.0614	48.6476	47.0692	44.6786	45.2149	43.2381	42.5485	41.8742	40.5103	40.2498	38.135	39.223	37.7366	36.3114	36.1428	34.6717	34.3805	34.2273	33.3384	32.4496	32.6948	33.0013	31.806	32.5416	31.7907	30.6413	30.8405	29.6759	29.0629	29.1702	28.9863
2 mM	2019_09_10_0002	raw	-3089.29	-2364.2	-2127.38	-1940	-1825.26	-1621.4	-1476.75	-1399.84	-1291.2	-1190.49	-1138	-1084.29	-989.075	-926.819	-865.173	-791.321	-760.803	-716.858	-680.237	-632.629	-567.932	-563.049	-532.532	-516.663	-478.821	-448.914	-445.251	-397.034	-384.216	-374.451	-373.84	-332.336	-325.623	-318.298	-317.078	-296.326	-287.781	-282.898	-272.522	-274.353	-254.822	-254.211	-233.459	-243.225	-260.315	-210.266	-226.135
		% 1st pulse	100	76.5287	68.863	62.7976	59.0833	52.4844	47.802	45.3127	41.7959	38.536	36.8369	35.0983	32.0162	30.001	28.0055	25.6149	24.6271	23.2046	22.0192	20.4781	18.3839	18.2258	17.238	16.7243	15.4994	14.5313	14.4127	12.8519	12.437	12.1209	12.1012	10.7577	10.5404	10.3033	10.2638	9.59202	9.31542	9.15736	8.8215	8.88077	8.24854	8.22879	7.55705	7.87316	8.42636	6.80628	7.31996
2 mM	2019_09_11_0007	raw	-3155.87	-2320.9	-1978.5	-1750.23	-1664.78	-1468.86	-1411.48	-1392.56	-1160.02	-1158.2	-1073.35	-1055.65	-997.673	-926.869	-851.184	-782.843	-791.995	-766.956	-729.129	-720.583	-641.226	-627.198	-623.542	-632.079	-601.557	-549.064	-529.547	-513.673	-525.871	-500.859	-497.184	-496.583	-458.124	-425.177	-437.373	-421.51	-402.587	-380.619	-409.302	-383.053	-412.351	-354.371	-373.906	-342.176	-343.389	-346.441	-349.492
		% 1st pulse	100	73.5424	62.6927	55.4596	52.7519	46.5438	44.7256	44.1261	36.7577	36.6997	34.0112	33.4505	31.6132	29.3697	26.9714	24.8059	25.0959	24.3025	23.1039	22.8331	20.3185	19.874	19.7582	20.0287	19.0615	17.3982	16.7798	16.2768	16.6633	15.8707	15.7542	15.7352	14.5166	13.4726	13.859	13.3564	12.7568	12.0607	12.9695	12.1378	13.0662	11.2289	11.848	10.8425	10.8809	10.9777	11.0743
2 mM	2019_09_11_0008	raw	-4186.71	-3568.42	-3237	-2859.19	-2596.13	-2370.91	-2226.26	-1968.69	-1777.65	-1687.93	-1553.04	-1487.73	-1285.1	-1273.5	-1230.77	-1153.26	-1071.47	-1006.16	-964.661	-935.364	-898.743	-848.083	-840.759	-804.749	-716.858	-749.817	-646.667	-663.147	-641.785	-643.005	-568.542	-580.139	-530.701	-538.025	-544.128	-483.704	-480.652	-409.851	-453.796	-484.314	-429.993	-404.968	-397.644	-375.671	-373.23	-370.789	-344.543
		% 1st pulse	100	85.2322	77.3161	68.2921	62.0089	56.6295	53.1744	47.0224	42.4594	40.3163	37.0945	35.5347	30.6947	30.4177	29.3972	27.5457	25.5922	24.0324	23.041	22.3413	21.4666	20.2566	20.0816	19.2215	17.1222	17.9095	15.4457	15.8393	15.3291	15.3583	13.5797	13.8567	12.6759	12.8508	12.9966	11.5533	11.4804	9.78934	10.839	11.5679	10.2704	9.67272	9.49778	8.97296	8.91464	8.85633	8.22946
2 mM	2019_09_11_0009	raw	-3216.86	-2430.73	-2199.4	-2066.35	-1939.39	-1877.14	-1761.78	-1696.47	-1524.96	-1514.59	-1426.09	-1305.24	-1249.08	-1235.66	-1115.42	-1097.72	-1055.6	-1031.8	-986.023	-882.874	-910.339	-806.58	-861.511	-817.566	-754.089	-721.741	-704.041	-760.193	-672.302	-636.902	-641.785	-611.267	-608.215	-594.788	-568.542	-577.698	-542.908	-498.962	-490.417	-471.497	-462.341	-476.99	-457.458	-449.524	-424.5	-437.317	-408.02
		% 1st pulse	100	75.5621	68.3711	64.2349	60.2884	58.3531	54.7671	52.7369	47.4054	47.0828	44.3317	40.5749	38.8293	38.4119	34.6741	34.1239	32.8147	32.0748	30.6517	27.4452	28.299	25.0735	26.7811	25.415	23.4418	22.4362	21.886	23.6315	20.8993	19.7989	19.9507	19.002	18.9071	18.4897	17.6738	17.9584	16.877	15.5109	15.2452	14.6571	14.3725	14.8278	14.2207	13.974	13.1961	13.5945	12.6838
2 mM	2019_09_11_0010	raw	-3582.51	-2834.83	-2454.58	-2220.21	-2016.96	-1855.22	-1800.29	-1687.37	-1509.76	-1367.55	-1360.83	-1260.13	-1224.12	-1213.74	-1056.27	-1020.25	-992.184	-941.523	-864.618	-828.002	-788.934	-770.022	-724.242	-660.77	-654.661	-611.934	-616.211	-571.035	-602.775	-593.623	-572.263	-562.5	-545.417	-527.707	-532.59	-517.331	-515.5	-522.218	-482.541	-467.287	-423.957	-412.965	-396.481	-381.832	-409.304	-394.655	-351.929
		% 1st pulse	100	79.1297	68.5157	61.9736	56.3002	51.7854	50.2521	47.1002	42.1424	38.173	37.9852	35.1744	34.1693	33.8795	29.4841	28.4787	27.6952	26.2811	24.1344	23.1123	22.0218	21.4939	20.216	18.4443	18.2738	17.0811	17.2005	15.9395	16.8255	16.57	15.9738	15.7013	15.2244	14.7301	14.8664	14.4404	14.3893	14.5769	13.4694	13.0436	11.8341	11.5273	11.0671	10.6582	11.4251	11.0161	9.82351
8 mM	2019_07_30_0013	raw	-2502.75	-2279.97	-2096.86	-1888.12	-1717.83	-1493.84	-1391.3	-1301.57	-1179.5	-1085.51	-1008.61	-920.715	-907.898	-797.424	-773.621	-690.002	-650.94	-603.943	-588.074	-570.374	-526.428	-498.962	-492.859	-417.786	-422.668	-410.461	-411.072	-387.878	-384.216	-374.451	-369.568	-323.181	-332.947	-292.664	-295.715	-296.936	-289.001	-293.274	-261.536	-295.715	-242.004	-245.667	-231.628	-299.988	-262.146	-238.953	-242.004
		% 1st pulse	100	91.0986	83.7825	75.442	68.638	59.6878	55.5908	52.0059	47.1284	43.3728	40.3	36.7882	36.2761	31.862	30.9109	27.5698	26.009	24.1312	23.4971	22.7899	21.034	19.9366	19.6927	16.6931	16.8882	16.4004	16.4248	15.4981	15.3518	14.9616	14.7665	12.9131	13.3033	11.6937	11.8156	11.8644	11.5474	11.7181	10.4499	11.8156	9.66955	9.81588	9.25497	11.9863	10.4743	9.54762	9.66955
8 mM	2019_07_30_0014	raw	-2567.44	-2481.38	-2344.67	-2237.85	-2122.5	-2056.58	-1955.87	-1826.48	-1724.55	-1703.8	-1513.98	-1468.2	-1396.79	-1294.25	-1268.62	-1227.72	-1095.89	-1066.59	-986.023	-995.789	-931.091	-867.615	-816.345	-786.438	-773.621	-744.324	-722.351	-674.133	-660.095	-639.343	-583.191	-605.164	-558.777	-572.815	-544.128	-549.622	-492.859	-500.183	-500.793	-478.821	-473.328	-426.941	-428.162	-420.837	-433.044	-384.216	-411.682
		% 1st pulse	100	96.648	91.323	87.1627	82.6697	80.1022	76.1797	71.1399	67.1699	66.3616	58.9683	57.1853	54.4039	50.4101	49.4116	47.8189	42.6839	41.5429	38.4048	38.7852	36.2653	33.7929	31.796	30.6312	30.1319	28.9908	28.135	26.257	25.7102	24.9019	22.7148	23.5707	21.7639	22.3107	21.1934	21.4073	19.1965	19.4818	19.5055	18.6497	18.4358	16.629	16.6766	16.3913	16.8668	14.9649	16.0347
8 mM	2019_07_30_0015	raw	-2274.48	-1709.29	-1514.59	-1336.36	-1195.98	-1006.16	-859.07	-835.876	-773.621	-710.144	-600.281	-517.273	-519.714	-485.535	-469.666	-428.772	-426.331	-373.23	-354.309	-320.129	-353.088	-302.429	-263.977	-249.329	-260.315	-236.511	-250.549	-238.342	-243.225	-252.38	-245.056	-252.991	-223.694	-210.876	-220.032	-210.266	-179.749	-168.762	-208.435	-166.931	-196.838	-155.945	-184.631	-150.452	-152.283	-163.879	-170.593
		% 1st pulse	100	75.1509	66.5906	58.7549	52.5829	44.2372	37.77	36.7503	34.0131	31.2223	26.3921	22.7425	22.8499	21.3471	20.6494	18.8515	18.7441	16.4095	15.5776	14.0749	15.524	13.2967	11.6061	10.962	11.4451	10.3985	11.0157	10.479	10.6937	11.0962	10.7742	11.123	9.83497	9.27143	9.67396	9.2446	7.90286	7.41983	9.16409	7.33933	8.65423	6.8563	8.11754	6.61479	6.69529	7.20515	7.50034
8 mM	2019_07_30_0016	raw	-3062.44	-2472.84	-2142.64	-1874.08	-1709.9	-1561.58	-1348.57	-1214.9	-1095.89	-1020.81	-893.86	-873.718	-766.296	-743.103	-732.117	-694.275	-638.123	-567.322	-546.57	-506.287	-489.197	-469.055	-436.096	-436.096	-437.927	-355.53	-375.061	-334.778	-340.271	-342.712	-349.426	-312.195	-281.067	-270.081	-290.833	-242.615	-234.07	-258.484	-256.042	-244.446	-226.135	-232.239	-205.383	-219.421	-202.942	-204.163	-185.852
		% 1st pulse	100	80.7474	69.9651	61.1958	55.8346	50.9915	44.0359	39.6712	35.7848	33.3333	29.1878	28.5301	25.0224	24.2651	23.9063	22.6707	20.8371	18.5252	17.8475	16.5321	15.9741	15.3164	14.2402	14.2402	14.3	11.6094	12.2471	10.9317	11.1111	11.1908	11.4101	10.1943	9.17788	8.81913	9.49676	7.92227	7.64325	8.44046	8.36074	7.98206	7.38416	7.58346	6.70653	7.16492	6.62681	6.66667	6.06876
8 mM	2019_09_10_0005	raw	-3976.14	-2348.94	-2237.85	-2099.91	-1880.8	-1731.87	-1588.44	-1438.9	-1408.39	-1261.29	-1198.43	-1116.03	-1048.28	-978.699	-961.609	-910.339	-844.421	-823.059	-765.686	-716.858	-716.248	-699.158	-677.795	-619.812	-636.902	-597.229	-580.75	-542.908	-538.025	-549.622	-527.039	-511.78	-483.704	-480.042	-472.107	-449.524	-450.745	-420.227	-434.875	-421.448	-418.396	-419.006	-396.423	-406.189	-386.658	-368.347	-362.854
		% 1st pulse	100	59.0759	56.2821	52.813	47.3022	43.5567	39.9493	36.1885	35.421	31.7215	30.1405	28.0682	26.3643	24.6143	24.1845	22.8951	21.2372	20.7	19.257	18.029	18.0137	17.5839	17.0466	15.5883	16.0181	15.0203	14.6059	13.6542	13.5314	13.823	13.255	12.8713	12.1652	12.0731	11.8735	11.3055	11.3362	10.5687	10.9371	10.5994	10.5227	10.538	9.97007	10.2157	9.72446	9.26395	9.1258
8 mM	2019_09_11_0011	raw	-4218.5	-1897.34	-1786.26	-1664.8	-1474.37	-1227.79	-1169.81	-1080.69	-1016.61	-956.183	-923.223	-794.439	-779.789	-677.248	-660.779	-655.285	-605.846	-564.336	-588.139	-550.303	-529.549	-487.433	-462.411	-446.538	-481.327	-434.947	-439.833	-398.939	-392.216	-376.349	-370.866	-364.761	-362.319	-350.122	-325.086	-311.059	-327.53	-308.003	-334.85	-298.243	-298.235	-308.601	-289.69	-282.974	-259.18	-269.551	-274.43
		% 1st pulse	100	44.9767	42.3436	39.4642	34.9501	29.105	27.7304	25.618	24.0989	22.6664	21.8851	18.8323	18.485	16.0542	15.6638	15.5336	14.3616	13.3776	13.9419	13.045	12.553	11.5546	10.9615	10.5852	11.4099	10.3105	10.4263	9.4569	9.29751	8.9214	8.79141	8.6467	8.58881	8.29969	7.7062	7.3737	7.76412	7.30124	7.93765	7.06987	7.0697	7.31542	6.86714	6.70792	6.14389	6.38974	6.50538
8 mM	2019_09_11_0012	raw	-3332.82	-2581.48	-2097.47	-1779.48	-1684.88	-1492.61	-1347.35	-1318.05	-1224.06	-1144.1	-1060.49	-985.413	-953.064	-923.767	-847.473	-837.097	-780.945	-749.817	-727.844	-675.964	-679.016	-615.54	-590.515	-608.826	-531.311	-510.559	-534.363	-496.521	-454.407	-446.472	-440.979	-444.031	-441.589	-433.655	-437.927	-373.23	-379.333	-372.009	-379.333	-356.14	-351.868	-354.919	-310.364	-322.571	-323.792	-301.208	-315.247
		% 1st pulse	100	77.4563	62.9338	53.3925	50.554	44.7853	40.4267	39.5477	36.7274	34.3284	31.8194	29.5669	28.5963	27.7172	25.4281	25.1167	23.4319	22.4979	21.8387	20.282	20.3736	18.469	17.7182	18.2676	15.9418	15.3191	16.0333	14.8979	13.6343	13.3962	13.2314	13.323	13.2497	13.0116	13.1398	11.1986	11.3817	11.162	11.3817	10.6858	10.5576	10.6492	9.31233	9.6786	9.71523	9.03763	9.45884
8 mM	2019_09_11_0013	raw	-3874.25	-2386.83	-1996.21	-1682.48	-1455.44	-1421.25	-1330.32	-1189.93	-1122.79	-1026.36	-944.576	-979.362	-918.941	-936.027	-776.119	-802.36	-818.231	-733.394	-699.826	-665.036	-656.488	-622.317	-578.371	-585.691	-600.952	-554.565	-553.953	-560.669	-546.629	-534.419	-502.685	-493.526	-473.39	-523.44	-460.567	-520.995	-493.53	-455.688	-474.609	-465.456	-436.158	-404.421	-398.928	-475.833	-398.939	-401.368	-416.631
		% 1st pulse	100	61.6075	51.525	43.4273	37.5669	36.6846	34.3374	30.7139	28.981	26.4919	24.3809	25.2787	23.7192	24.1602	20.0328	20.7101	21.1197	18.93	18.0635	17.1655	16.9449	16.0629	14.9286	15.1175	15.5114	14.3141	14.2983	14.4717	14.1093	13.7941	12.975	12.7386	12.2189	13.5108	11.8879	13.4476	12.7387	11.762	12.2504	12.0141	11.2579	10.4387	10.2969	12.2819	10.2972	10.3599	10.7539
[truncated: 53 more columns]

## Sheet: 2D-inset
Tau calculated from non-linear regression of individual experimental data
Calcium:	File Name:	Tau (s)
0.5 mM	2019_08_08_0002	0.8938
0.5 mM	2019_08_09_0010	1.491
0.5 mM	2019_08_09_0011	0.3713
0.5 mM	2019_08_09_0012	1.177
0.5 mM	2019_08_13_0001	2.4
0.5 mM	2019_08_13_0002	1.492
0.5 mM	2019_09_11_0000	2.136
0.5 mM	2019_09_11_0001	2.675
0.5 mM	2019_09_11_0002	1.265
0.5 mM	2019_09_11_0003	1.689
1 mM	2019_08_08_0004	0.8219
1 mM	2019_08_08_0005	0.8124
1 mM	2019_08_09_0008	1.022
1 mM	2019_08_09_0009	0.6884
1 mM	2019_08_13_0004	2.627
1 mM	2019_08_13_0005	1.194
1 mM	2019_09_10_0003	0.9326
1 mM	2019_09_11_0004	1.868
1 mM	2019_09_11_0005	1.011
2 mM	2019_08_08_0006	0.4546
2 mM	2019_08_09_0006	0.5946
2 mM	2019_08_09_0007	0.7921
2 mM	2019_08_13_0006	1.373
2 mM	2019_08_13_0007	0.8779
2 mM	2019_08_13_0013	1.158
2 mM	2019_07_30_0009	0.546
2 mM	2019_07_30_0010	0.9191
2 mM	2019_07_30_0011	0.832
2 mM	2019_07_30_0012	1.394
2 mM	2019_09_10_0002	0.904
2 mM	2019_09_11_0007	0.8907
2 mM	2019_09_11_0008	0.9126
2 mM	2019_09_11_0009	1.268
2 mM	2019_09_11_0010	0.9903
8 mM	2019_07_30_0013	0.7848
8 mM	2019_07_30_0014	1.333
8 mM	2019_07_30_0015	0.5428
8 mM	2019_07_30_0016	0.6334
8 mM	2019_09_10_0005	0.7738
8 mM	2019_09_11_0011	0.4745
8 mM	2019_09_11_0012	0.8364
8 mM	2019_09_11_0013	0.5397
