# Supplementary material for: Spontaneous and evoked neurotransmission are partially segregated at inhibitory synapses
Source: eLife. 2020 May 13;9:e52852. doi: 10.7554/eLife.52852 (PMC7250572; doi:10.7554/eLife.52852)
Supplement: Figure 3—figure supplement 1—source data 1. [file elife-52852-fig3-figsupp1-data1.xlsx]

## Sheet: S3B-C
Amplitudes (pA) taken from 21 random events in each file before and after TTX addition
Example traces in figure S3A came from bolded file
2019_08_14_0005			2019_08_14_0008			2019_08_14_0015			2019_08_14_0018			2019_08_28_0012			2019_08_29_0007			2019_09_04_0003			2019_09_04_0015
Before TTX	After TTX		Before TTX	After TTX		Before TTX	After TTX		Before TTX	After TTX		Before TTX	After TTX		Before TTX	After TTX		Before TTX	After TTX		Before TTX	After TTX
14.648	8.545		8.85	10.681		13.428	11.292		10.376	7.019		26.855	6.714		10.681	7.629		6.409	21.057		11.597	8.24
13.428	16.174		12.512	13.733		8.545	15.259		5.188	8.545		10.681	15.564		10.681	13.123		9.155	7.935		6.104	7.629
8.24	29.297		13.123	8.24		7.324	14.343		6.104	6.104		22.278	7.935		22.583	7.629		15.259	16.174		7.629	7.324
13.428	10.071		18.005	10.986		25.33	15.564		7.629	6.409		11.902	7.629		11.597	9.766		14.954	5.798		11.597	20.447
15.259	13.123		10.986	13.123		7.629	6.409		5.798	7.019		6.714	6.409		10.376	11.902		8.85	7.935		5.798	5.798
42.725	8.545		24.719	8.545		20.142	9.155		6.714	8.545		6.714	7.019		11.597	12.817		7.935	10.986		5.188	7.935
6.104	8.24		11.292	7.019		11.597	7.629		17.395	7.935		19.531	15.564		9.46	25.33		6.714	19.226		5.188	10.681
8.85	12.207		11.597	8.24		6.104	8.545		9.46	5.188		10.986	7.629		16.174	12.512		7.629	12.817		37.842	12.817
17.09	34.18		31.128	10.071		12.817	7.629		12.207	8.545		7.324	7.324		9.155	14.648		9.46	7.629		14.648	7.019
7.629	19.226		12.207	14.954		16.479	10.986		6.714	6.104		6.104	7.019		19.226	11.292		7.019	5.798		5.188	11.902
10.681	10.681		13.428	7.324		6.714	12.207		6.409	5.798		6.104	5.188		16.785	17.09		9.766	11.902		7.324	7.935
10.681	7.629		11.597	9.155		8.24	14.954		6.104	6.409		9.766	6.714		10.071	10.986		8.85	11.292		8.545	14.954
11.292	54.016		8.24	8.85		9.155	8.24		8.24	4.883		8.85	16.479		16.479	10.376		6.409	7.935		21.973	36.011
15.259	13.123		11.902	20.447		29.907	6.104		7.629	6.409		8.545	14.343		17.395	11.292		14.648	14.038		7.324	6.409
7.019	12.207		10.986	10.681		29.297	21.057		5.188	6.714		7.019	25.635		10.376	7.019		6.714	22.278		14.038	30.823
50.964	22.583		26.245	17.395		13.123	16.479		5.798	6.714		6.409	7.935		11.597	8.85		6.714	6.409		31.433	7.324
12.817	9.46		17.09	14.648		10.986	23.193		6.714	11.902		13.428	7.019		11.597	8.85		6.104	10.071		16.479	14.038
8.85	32.654		20.142	10.986		14.648	7.019		11.292	7.324		11.597	29.907		13.428	7.629		7.935	6.714		14.648	6.714
6.409	10.986		6.409	9.766		7.935	21.667		8.85	7.935		9.155	6.104		15.259	9.46		9.46	10.071		6.714	17.7
8.24	9.46		8.545	11.292		6.409	15.869		7.629	6.104		60.73	10.071		10.071	19.836		9.46	5.798		5.798	5.493
8.24	10.681		7.629	8.24		28.687	7.324		6.714	7.019		11.292	14.954		13.123	49.744		10.071	5.493		8.85	6.104

## Sheet: S3D-E
Interevent Intervals (ms) taken randomly from each file before and after TTX addition
2019_08_14_0008			2019_08_14_0015			2019_08_14_0018			2019_08_28_0012			2019_08_29_0007			2019_09_04_0003			2019_09_04_0015
Before TTX	After TTX		Before TTX	After TTX		Before TTX	After TTX		Before TTX	After TTX		Before TTX	After TTX		Before TTX	After TTX		Before TTX	After TTX
79.5	776.5		183.5	567		1269.4	315.3		1011.7	742.6		67.5	32.9		449.8	212.3		201.5	109.3
282.1	103.1		444.8	190.3		523.1	322.3		377.5	987		453.6	250.3		95.9	83.9		101	318.3
45.5	2007.6		112.6	246.1		1213.6	46.4		305.7	414.7		316.8	115.6		894.7	248.7		3379.2	398.7
2437.7	659.7		128.6	297.8		3259.9	661.1		120.3	44.2		114.1	168.9		200.3	235.2		164.9	1466.9
202.2	1220.3		104.7	777.4		891.3	1735.1		106.5	188.5		135	51.7		167.5	370.3		171	350.5
212.4	704		65	431.1		799.5	4825		501	10.5		499.5	59.3		395.3	28		117	567.1
2265.1	877.2		78.2	296.7		465.6	204.1		287	1111		137.9	99.3		134.3	346.2		156.4	865.4
184.9	113.5		852.7	237.9		415.7	1856.2		1847.9	2755.2		339.3	964.3		727.8	297.8		30.3	999.3
146.9	1670.1		216.5	476.3		1925.7	1960.9		265.8	1753.7		37.2	131.3		661.1	983.9		623.9	1020
300.8	57.9		38.8	1077.4		923.5	273.3		437.9	159.3		133	201.7		299.9	719		444.1	182.4
64.7	126.1		302.2	818.5		1646.6	1196		185.6	2551.9		84.4	266.6		451.2	253.9		224.4	2145.3
1043.1	2443.2		270	842.5		983.1	2684.9		260.1	259.6		410.6	134.4		82.7	415.1		980.1	1139.5
948.7	3407.9		287.1	15.8		1575.5	187.9		300.2	313.2		31.5	399.6		136.8	170.9		16.3	1355.4
431.3	124.7		142.5	113.5		4517.2	328.7		478.1	460		33.9	181.8		1168.5	431.9		1179.4	1315.2
85	1678.6		35.5	671.9		879.6	1182.7		417.8	82.8		236.4	193.5		48.5	136.5		448	567.2
2221.5	2549		637	1037.1		476.8	1009.2		1628.6	739.5		69.9	421.6		1050.7	131.9		586.2	824.1
55.7	268.9		75.7	491.7		259.8	317.8		51	143.4		281.4	409.1		494.5	114.7		292.1	429.3
417.9	888		279.2	192.5		1314.8	26.9		67.7	507.6		76	682.2		950.9	223.1		38.8	598.4
961.1	1660		236.2	260		1483.5	1273.3		131.4	409.6		515.4	469		1244	188.5		456.7	473.7
4580.3	175.9		124.4	319.7		655.6	25.2		1310.8	126.1		232.4	152.7		199.9	2682.1		1041.8	681.1
184.1	539		208.5	920.7		2911.7	50.2		917.9	1199.6		217.4	734.2		716	324.9		458.6	178.1

## Sheet: S3F
Measurements are summed area (pA*ms) of all events in 20 second bin
		Time (s):
File Name:		20	40	60	80	100	120	140	160	180	200	220	240	260	280	300	320	340	360	380	400	420	440	460	480	500	520	540	560	580	600	620
2019_08_14_0005	Raw	3939.51	5856.43	9195.76	3274.49	9962.51	7361.06	7836.22	4412	5336.99	4213.54	5993.34	4159.24	5447.83	6218.25	7092	3168.54	5048.4	4790.08	5485.22	4467.29	5289.36	4105.54	5003.03	3248.32	2401.49	5381.51	3090.02	6468.02	3449.44	3384.59	6780.09
	% 1st 2 min	59.705	88.7567	139.366	49.6263	150.986	111.56	118.761	66.8658	80.8844	63.858	90.8317	63.0351	82.5642	94.2403	107.482	48.0206	76.5107	72.5957	83.1309	67.7037	80.1625	62.2212	75.8231	49.2297	36.3956	81.5591	46.8306	98.0257	52.2778	51.2949	102.755
2019_08_14_0008	Raw	2507.61	3288.07	5959.36	4940.55	4312.22	2418.91	1949.88	4705.56	3341.04	3168.09	3028.37	1436.26	5579.42	4685.05	6251.43	7338.4	5371.67	4610.31	6332.42	6506.53	5477.13	5480.91	4789.59	1061.32	4583.86	8898.38	2635.48	2745.25	3934.35	1174.01	3105.04
	% 1st 2 min	64.2244	84.2133	152.63	126.536	110.444	61.9526	49.9399	120.518	85.57	81.1404	77.5619	36.7852	142.899	119.992	160.11	187.949	137.578	118.078	162.185	166.644	140.279	140.376	122.67	27.1823	117.401	227.903	67.4993	70.3107	100.766	30.0685	79.5256
2019_08_14_0015	Raw	15020.6	15213.5	18295.7	11524.5	11142.2	13415.3	11027.1	10533.6	10562.4	19253.5	9477.51	10891.4	11395	9569.67	12538.3	10125.8	20784	9959.38	10040.2	18927.8	8536.74	6809.64	7102.43	10191.8	9821.46	5757.19	6143.93	6804.19	8760.2	7664.75	5529.82
	% 1st 2 min	106.514	107.882	129.739	81.7228	79.0118	95.1304	78.1952	74.6956	74.9002	136.53	67.2069	77.2333	80.8039	67.8604	88.9119	71.8039	147.383	70.6239	71.1968	134.221	60.5357	48.2885	50.3647	72.2718	69.6459	40.8254	43.5678	48.2498	62.1203	54.3522	39.213
2019_08_14_0018	Raw	656.46	390.79	876.77	1087.51	827.87	2885.86	1604.24	1124.57	874.63	793.86	1255.03	494.15	296.18	1111.71	1209.66	676.61	419.63	2295.26	886.43	865.59	296.51	2039.41	1054.69	519.02	979.31	387.96	843.98	1114.41	582.94	724.17	397.36
	% 1st 2 min	58.5667	34.8647	78.2218	97.0232	73.8592	257.465	143.124	100.33	78.0309	70.8249	111.969	44.086	26.424	99.1822	107.921	60.3644	37.4377	204.774	79.0836	77.2244	26.4534	181.948	94.0951	46.3048	87.37	34.6122	75.2964	99.4231	52.0075	64.6075	35.4508
2019_08_28_0012	Raw	9126.8	7994.97	5761.62	6817.17	5384.33	4085.46	6881.17	8292.07	6473.42	3322.32	3010.22	5197.16	6252.26	6821.64	5897.98	5357.45	3654.39	4909.04	8296.17	6357.31	2712.52	4094	3820.5	4900.51	6090.79	2568.17	9334.05	8831.98	6675.69	3011.26	3583.73
	% 1st 2 min	139.802	122.465	88.2548	104.423	82.4756	62.5799	105.404	127.016	99.158	50.8903	46.1097	79.6086	95.7703	104.492	90.3435	82.0639	55.9769	75.1952	127.078	97.3794	41.5496	62.7107	58.5213	75.0646	93.2969	39.3385	142.976	135.286	102.256	46.1256	54.8945
2019_08_29_0007	Raw	12567.5	9694.88	14740.8	15411.8	11947.8	11237.6	8954.44	12514.7	7873.31	14338.7	10482.5	10242	11149.4	10050.8	11267	14142.1	9681.05	18163.4	14832.7	12425.1	9550.64	8869.56	10998.4	12122.3	14844.7	27437.9	10002.7	8747.14	15561.7	10055.3	13314.8
	% 1st 2 min	99.7415	76.9432	116.99	122.315	94.8233	89.187	71.0667	99.3226	62.4863	113.799	83.1938	81.2854	88.4865	79.7677	89.4202	112.239	76.8334	144.153	117.72	98.6116	75.7984	70.393	87.2887	96.2087	117.815	217.76	79.3865	69.4214	123.505	79.8033	105.673
2019_09_04_0003	Raw	9269.45	4059.05	4590.83	7572.51	8137.9	10171.8	6129.85	5103.5	5774.5	6849.94	5195.68	4659.03	3988.63	6981.04	3594.86	9869.78	7002.22	7379.41	6129.87	5348.85	6488.78	4862.19	5747.75	7157.23	8374.82	6362.17	9002.98	6946.35	7285.13	5958.63	5103.16
	% 1st 2 min	126.974	55.6015	62.8859	103.729	111.474	139.335	83.9677	69.9085	79.1	93.8316	71.1712	63.8201	54.6369	95.6274	49.243	135.198	95.9175	101.084	83.9679	73.2694	88.8843	66.603	78.7336	98.0409	114.72	87.15	123.324	95.1522	99.7929	81.6223	69.9039
2019_09_04_0015	Raw	9065.41	5589.5	9546.52	5581.69	6910.58	4481.7	6286.18	8970.04	6932.28	7393.93	10480.9	7792.41	15824.4	16251.5	5974.87	9332.97	10469.9	9563.27	7333.84	9948.09	9018.22	8732.83	11745.4	10001.3	8026.18	7705.73	9019.48	19257.9	11262.9	11565.8	10014.1
	% 1st 2 min	132.099	81.4491	139.11	81.3353	100.7	65.3065	91.601	130.71	101.016	107.743	152.726	113.549	230.59	236.813	87.0647	135.998	152.565	139.354	106.867	144.962	131.412	127.253	171.152	145.737	116.956	112.286	131.43	280.623	164.121	168.534	145.924
