# Supplementary material for: Spontaneous and evoked neurotransmission are partially segregated at inhibitory synapses
Source: eLife. 2020 May 13;9:e52852. doi: 10.7554/eLife.52852 (PMC7250572; doi:10.7554/eLife.52852)
Supplement: Figure 3—source data 1. [file elife-52852-fig3-data1.xlsx]

## Sheet: 3B
Measurements are summed area (pA*ms) of all events in 20 second bin
Bolded cells excluded as outliers during analysis
Example traces in 3C came from bolded files at times indicated in figure
			Time (s):
Internal:	File Name:		20	40	60	80	100	120	140	160	180	200	220	240	260	280	300	320	340	360	380	400	420	440	460	480	500	520	540	560	580	600
Standard	2017_05_13_0005	raw	3131.23	3347.28	1701.26	3343.07	2946.53	3026.14	1847.65	931.83	99.18	137.76	142.52	275.94	65.92	187.01	291.2	55.61	0	0	39.31	0	0	0	350.16	0	0	41.44	0	16.24	0	0
		% 1st 2 min	107.384	114.793	58.3439	114.649	101.05	103.78	63.3643	31.9567	3.40133	4.72441	4.88765	9.46323	2.26069	6.41342	9.98656	1.90712	0	0	1.34812	0	0	0	12.0086	0	0	1.42116	0	0.556943	0	0
Standard	2017_07_12_0001	raw	23460.5	22982.4	13619.3	23301.5	27239.7	16650.3	32363.3	14446.2	14433.5	5607.17	5074.43	3977.58	2337.35	1977.28	2160.09	2111.5	862.56	880.13	17181	885.12	1191.83	841.55	1748.66	1174.56	447.39	345.58	237.3	160.28	112.55	194.04
		% 1st 2 min	110.616	108.362	64.215	109.866	128.435	78.506	152.593	68.1135	68.0539	26.4377	23.9259	18.7542	11.0206	9.32285	10.1848	9.95569	4.06696	4.1498	81.0083	4.17333	5.61946	3.9679	8.24491	5.53803	2.10944	1.6294	1.11887	0.755718	0.530672	0.914896
Standard	2017_07_12_0004	raw	8942.95	21014.5	10426.4	8621.71	9018.55	57460.1	8063.28	6956.7	3392.79	3026.89	1058.11	1904.56	1077.16	1314.44	6220.57	734.26	268.99	945.62	440.31	523.5	140.69	1981.08	195.8	124.45	51.94	347.41	32.35	0	143.98	0
		% 1st 2 min	46.4633	109.181	54.1707	44.7942	46.856	298.535	41.8929	36.1437	17.6273	15.7263	5.49743	9.89517	5.5964	6.8292	32.3191	3.81486	1.39754	4.91299	2.28764	2.71985	0.730957	10.2927	1.01728	0.646582	0.269855	1.80497	0.168075	0	0.748051	0
Standard	2017_07_12_0007	raw	5870.04	4661.85	9299.12	7696.94	7383.11	3087.23	4719.3	7282.15	4034.51	1877.27	15458.9	4121.1	233.83	527.7	1237.73	275.15	228.15	103.08	368.72	0	0	1629.46	405.76	122.98	388.8	0	95.4	0	754.7	26.25
		% 1st 2 min	92.689	73.6115	146.835	121.536	116.581	48.7479	74.5186	114.986	63.7057	29.6424	244.098	65.0729	3.69222	8.33248	19.544	4.34467	3.60253	1.62765	5.82216	0	0	25.7295	6.40703	1.94188	6.13922	0	1.50638	0	11.9169	0.414492
Standard	2017_07_12_0010	raw	23213.6	15272.3	12851.7	104776	15383	10843.5	9700.67	9101.84	4265.12	1413.02	1650.94	1238.76	2006.91	1214.11	4124.15	853.33	442.07	789.78	703.56	2274.18	356.87	1305.54	130.56	8.18	180.78	397.29	0	192.26	0	337.04
		% 1st 2 min	76.3857	50.2543	42.2891	344.771	50.6187	35.6812	31.9206	29.9501	14.0346	4.64962	5.43251	4.07621	6.60385	3.9951	13.5708	2.80793	1.45466	2.59882	2.3151	7.48332	1.1743	4.29595	0.429615	0.0269168	0.594867	1.30731	0	0.632643	0	1.10905
Standard	2017_07_12_0013	raw	2454.04	2924.08	3709.56	1443.66	4427.19	4164.56	2348.21	1935.17	2682.93	392.41	815.73	330.89	745.42	118.35	183.41	243.96	124.32	100.34	96.81	0	81.78	30.82	56.52	4.52	6.53	162.48	0	0	0	0
		% 1st 2 min	76.9972	91.745	116.39	45.2958	138.906	130.666	73.6767	60.7173	84.1788	12.3121	25.5941	10.3819	23.3881	3.71331	5.75461	7.65441	3.90062	3.14824	3.03748	0	2.5659	0.966999	1.77335	0.141818	0.204883	5.09792	0	0	0	0
Standard	2017_09_07_0004	raw	2424.68	1508.91	2264.88	1441.17	1388.3	2027.33	2778.09	24845.6	440.43	79.36	616.21	30.64	325.81	1659.42	480.65	104.18	355.82	89.3	411.39	144.84	13.49	106.01	0	18.13	26.67	854.64	149.67	27.47	57.07	214.18
		% 1st 2 min	131.594	81.8927	122.921	78.2163	75.3469	110.029	150.775	1348.44	23.9034	4.30709	33.4434	1.66292	17.6826	90.0613	26.0862	5.65414	19.3113	4.84656	22.3273	7.86087	0.73214	5.75346	0	0.983965	1.44745	46.3837	8.123	1.49087	3.09735	11.6241
Standard	2017_10_13_0013	raw	2620.37	1285.1	2302	3485.63	1639.52	1447.62	2542.43	1518.99	898.37	480.17	508.91	416.26	12.57	119.51	1373.9	26.49	8.85	90.82	604.8	0	0	44.92	0	24.48	95.28	0	0	0	10.99	0
		% 1st 2 min	123.02	60.3322	108.073	163.642	76.9713	67.9621	119.361	71.3127	42.1762	22.5428	23.892	19.5424	0.59013	5.61069	64.5011	1.24364	0.415485	4.26377	28.3938	0	0	2.10888	0	1.14927	4.47316	0	0	0	0.515953	0
Standard	2017_10_13_0016	raw	10852.2	8824.87	8416.93	26992	4277.43	5818.49	9092.41	16103.4	119716	25952	28196.4	7618.9	729.12	1061.24	1119.59	659.36	101.57	5493.08	434.02	178.9	109.07	83.12	314.76	311.03	40.16	87.04	169.8	75.32	137.58	2140.57
		% 1st 2 min	99.8943	81.233	77.4779	248.462	39.3738	53.5592	83.6957	148.232	1101.99	238.888	259.548	70.132	6.71156	9.76872	10.3058	6.06941	0.934953	50.5638	3.99516	1.64678	1.00399	0.76512	2.89737	2.86303	0.369673	0.801204	1.56301	0.693321	1.26642	19.704
Standard	2017_10_13_0019	raw	1646.85	1667.07	1912.97	1525.21	6512.51	4031.94	1495.78	1246.95	882.56	351.48	1163.14	472.65	57.5	6.65	26.55	0	0	83.62	5.07	0	59.88	10.74	90.88	0	0	6.23	70.92	0	0	0
		% 1st 2 min	57.1276	57.829	66.359	52.908	225.912	139.864	51.8871	43.2554	30.6151	12.1925	40.3482	16.3958	1.99462	0.230682	0.920993	0	0	2.90069	0.175873	0	2.07718	0.37256	3.15254	0	0	0.216112	2.46014	0	0	0
high Cl-	2019_07_27_0006	raw	71996	130481	54947.2	41131	26624.2	28285.5	32055.6	16119.8	9801.31	99565.3	20322.3	15785.2	9429.57	8579.64	3988.32	9166.62	7159.43	11635.7	1875.01	5548.46	7393.06	4430.45	1174.42	3459.66	2538.8	2265.59	4072.33	2389.53	943.97	723.61
		% 1st 2 min	122.212	221.489	93.2719	69.8191	45.1941	48.014	54.4137	27.363	16.6375	169.01	34.4967	26.795	16.0065	14.5638	6.7701	15.5602	12.153	19.7514	3.18279	9.41841	12.5496	7.52061	1.99356	5.87271	4.30956	3.8458	6.9127	4.05618	1.60237	1.22831
high Cl-	2019_07_27_0012	raw	72084.3	55746	62601.2	84481.1	62677.4	50718.4	58904	36767.1	21489.6	18226.2	9837.91	11600.1	6899.55	4771.61	5699.18	3267.25	3053.88	5667.38	1563.51	1544.38	1159.47	26062.3	1239.41	1031.08	4425.17	2471.95	22689.8	450.88	219.53	657.69
		% 1st 2 min	111.382	86.1367	96.7292	130.537	96.8468	78.3682	91.0163	56.8112	33.2049	28.1625	15.2012	17.9241	10.6609	7.37292	8.80617	5.04844	4.71875	8.75703	2.41588	2.38632	1.79157	40.2705	1.91509	1.59319	6.83761	3.81957	35.0594	0.696683	0.33921	1.01624
high Cl-	2019_07_27_0015	raw	19339.9	11850.3	19355.3	19064.1	19546.4	19403.5	19545.3	9549.76	7366.97	8167.93	4860.76	4176.47	3884.58	2261.39	1507.7	1251.57	806.95	637	3308.69	1007	510.34	3887.97	602.39	323.65	427.3	104.38	208.58	257.3	75.25	133.06
		% 1st 2 min	106.89	65.4958	106.975	105.366	108.031	107.242	108.025	52.7808	40.7167	45.1435	26.8651	23.083	21.4698	12.4985	8.33294	6.91733	4.45995	3.52065	18.2869	5.56561	2.82061	21.4885	3.32936	1.78879	2.36166	0.5769	1.15281	1.42208	0.415901	0.735413
high Cl-	2019_07_28_0000	raw	198.743	188.109	189.665	227.341	203.577	210.802	217.91	96.4784	69.8336	65.6661	66.7955	57.8947	51.8164	68.3762	56.3648	64.9367	80.534	41.4594	47.2901	56.7105	47.0414	34.4938	696.506	31.3984	41.1502	32.7868	37.5397	35.4663	698.041	38.9859
		% 1st 2 min	97.8842	92.6467	93.4127	111.969	100.265	103.823	107.324	47.5171	34.3941	32.3416	32.8978	28.514	25.5204	33.6763	27.7605	31.9823	39.6642	20.4194	23.2911	27.9308	23.1686	16.9887	343.04	15.4642	20.2671	16.148	18.4889	17.4677	343.796	19.2012
high Cl-	2019_07_28_0002	raw	41042.4	40873.2	25061.1	27272.4	42516.4	20326.3	28187.3	19315.3	9105.08	12369.1	22566.8	14328.9	5962.91	37373.1	7642.89	9022.96	29689.4	4873.01	10042.9	27575.8	1596.36	6493.58	22439	1052.24	7833.14	26450.7	2875.23	14942.2	19400.6	13307.8
		% 1st 2 min	124.944	124.429	76.2927	83.0244	129.431	61.8787	85.8095	58.801	27.7183	37.6547	68.6993	43.6209	18.1527	113.774	23.267	27.4683	90.3826	14.8347	30.5731	83.948	4.85974	19.7682	68.3102	3.2033	23.8462	80.5229	8.75296	45.4881	59.0606	40.5125
high Cl-	2019_07_28_0003	raw	8595.72	12435.8	11091.5	12917.8	12383.2	16258.8	8514.61	5958.01	2612.74	2619.33	6443.19	3332.81	2825.18	1638.12	1420.86	1798.33	10488.7	744.75	1511.39	1075.48	1370.76	640.74	1102.37	702.33	514.98	10939.8	282.28	572.8	322.98	395.37
		% 1st 2 min	69.9951	101.265	90.3184	105.19	100.836	132.396	69.3346	48.5162	21.2756	21.3293	52.467	27.1391	23.0055	13.3392	11.5701	14.6438	85.4097	6.06451	12.3073	8.75766	11.1621	5.21756	8.97662	5.71909	4.19349	89.0828	2.29861	4.66432	2.63003	3.21951

## Sheet: 3D-E
Measurements are amplitudes (pA) of 100 randomly chosen events from the first 2 min of the listed files
Standard	High Cl-
2019_04_16_0000	2019_07_27_0006
2019_04_16_0002	2019_07_27_0012
2019_04_16_0003	2019_07_27_0015
2019_04_16_0004	2019_07_28_0000
2019_04_16_0006	2019_07_28_0002
2019_04_16_0007	2019_07_28_0003
2019_04_16_0008
2019_04_17_0001
2017_04_17_0003
2019_04_17_0004
2019_04_17_0005
2019_04_17_0006
2019_04_19_0000
2019_04_19_0002
29.297	19.836
7.935	9.766
42.114	71.716
7.019	16.785
19.836	17.09
7.629	15.564
7.324	12.817
11.902	14.343
11.292	12.817
12.207	12.207
8.85	6.104
12.512	38.147
11.292	19.226
13.733	24.414
6.714	10.681
9.155	18.616
7.629	33.264
11.292	22.278
7.629	23.193
17.395	11.597
9.46	22.278
11.597	79.651
6.409	13.123
9.766	106.506
8.24	62.561
6.714	10.376
7.019	17.7
8.85	17.395
33.875	21.362
10.376	16.174
28.076	24.719
17.395	13.733
11.597	13.123
7.019	22.583
25.33	32.959
7.019	22.583
7.629	44.861
8.545	11.292
38.452	13.428
10.376	36.011
25.94	12.207
11.902	14.038
10.681	197.754
14.648	27.161
9.766	11.597
21.667	16.174
7.629	33.875
7.629	20.142
14.648	33.875
23.193	10.376
11.292	11.292
9.155	30.823
9.766	18.616
34.18	11.292
8.85	17.395
17.7	15.259
8.85	20.447
6.714	93.079
41.199	14.648
22.278	16.785
7.324	11.902
7.019	13.428
8.24	57.983
6.714	16.785
7.019	28.381
10.681	21.362
7.324	28.381
25.024	14.343
12.207	21.057
21.667	21.362
16.785	14.038
10.071	245.667
33.569	21.667
17.395	29.602
14.038	46.997
5.798	144.043
18.311	34.18
26.245	23.193
20.447	17.7
7.935	14.343
10.071	16.174
11.597	11.902
9.155	36.926
14.954	14.954
6.104	10.986
16.479	31.738
6.104	26.855
10.986	14.343
12.207	26.855
10.071	13.733
7.935	14.343
7.935	36.011
12.207	13.428
18.311	29.602
8.24	10.986
9.155	12.207
10.681	25.94
15.259	12.512
22.583	93.689
7.935	12.207
8.85	56.763
15.259	66.528
21.057	37.231
15.564	10.986
14.648	13.428
9.766	10.986
7.019	26.245
12.817	39.063
10.681	25.33
18.005	29.297
24.109	13.428
7.935	30.518
9.155	96.741
7.629	84.534
14.954	46.692
25.94	10.071
9.46	11.902
14.648	96.13
13.123	43.945
13.733	11.902
11.597	21.057
12.817	26.855
16.479	7.935
62.561	10.681
19.531	27.466
9.766	52.49
12.207	35.095
13.123	6.714
11.597	13.733
15.869	16.479
15.564	10.376
8.85	74.158
8.85	10.986
20.752	84.839
13.428	52.185
23.499	19.836
8.85	19.836
11.902	51.575
12.207	36.316
10.071	41.809
23.193	84.534
36.316	25.024
27.466	16.174
18.921	26.55
14.038	28.687
8.24	161.743
6.409	11.292
9.766	143.433
10.376	32.349
9.766	202.332
14.954	17.395
10.681	42.419
9.155	48.218
11.902	25.94
8.24	69.275
11.597	44.556
15.564	25.33
10.986	13.123
15.869	39.978
19.531	16.479
17.395	24.109
7.935	39.063
13.123	25.94
48.218	14.954
15.259	18.311
7.629	21.362
10.071	11.902
10.681	150.757
8.545	44.861
13.733	42.114
9.155	18.005
10.376	12.207
10.986	21.973
10.376	31.738
19.531	112.305
25.024	27.771
12.817	21.667
8.24	35.095
9.766	21.362
6.409	28.687
10.376	14.648
10.071	12.207
10.376	14.343
28.381	102.844
14.954	41.504
52.185	28.687
12.512	45.166
13.123	19.226
10.681	9.766
31.128	19.531
10.376	12.512
17.7	9.46
9.766	16.479
18.311	13.428
17.395	29.297
10.071	11.292
18.005	14.343
7.629	13.733
32.959	18.616
16.174	16.479
10.071	13.733
107.422	18.005
35.706	18.921
14.648	9.46
14.648	10.376
17.395	20.447
85.449	36.316
10.681	32.959
8.85	20.142
13.123	9.155
10.986	18.005
75.378	11.292
14.648	13.123
18.311	12.817
11.292	9.46
131.226	19.836
22.583	9.766
13.733	16.174
13.428	12.512
12.207	21.057
12.207	27.161
21.362	24.719
11.292	11.597
12.207	11.597
42.725	11.597
28.381	26.855
9.155	14.954
21.057	14.954
7.019	10.071
12.817	18.921
30.212	24.719
18.005	10.071
15.259	12.817
14.954	14.954
8.85	22.583
13.428	25.024
94.91	12.817
147.705	38.757
28.992	15.869
15.259	19.531
10.071	38.757
28.992	31.128
13.123	15.869
11.902	9.766
23.499	14.343
16.479	16.785
40.283	22.583
11.597	22.888
10.071	31.128
39.063	33.569
20.447	10.071
13.123	44.556
12.512	37.537
10.681	25.33
8.24	25.94
132.752	17.09
10.071	42.419
36.621	13.428
92.773	31.128
14.648	19.836
11.292	38.452
10.071	14.648
56.152	17.395
107.117	88.196
11.597	9.46
20.447	10.071
89.417	29.907
7.324	9.155
21.667	19.531
14.954	11.292
26.245	18.005
14.954	29.602
13.428	17.395
14.954	9.766
22.278	31.433
15.259	11.902
12.512	25.635
27.771	13.123
9.46	8.545
19.226	17.09
29.907	58.594
20.447	15.564
16.479	18.921
23.499	13.733
22.278	19.836
18.005	32.654
9.46	18.921
13.123	24.719
19.226	15.564
11.597	20.142
14.648	18.005
12.207	15.869
7.019	14.648
14.038	14.343
12.512	35.4
11.902	14.343
11.597	22.583
28.687	10.681
12.512	19.836
11.902	12.512
11.597	6.561
7.935	14.496
11.902	10.681
18.616	12.512
15.259	10.986
10.071	24.872
11.292	10.223
6.714	16.785
6.104	12.97
11.292	18.768
9.155	25.177
8.85	9.766
13.428	16.022
27.466	14.954
15.564	14.801
10.986	11.597
7.935	25.635
16.174	13.886
7.935	27.161
7.935	25.635
9.46	16.632
17.7	13.58
10.376	7.782
10.986	10.376
8.545	7.935
14.343	15.259
10.681	7.629
8.85	15.259
10.071	6.256
7.324	5.951
11.597	23.499
11.292	12.817
7.629	12.665
36.316	8.087
20.142	11.749
20.447	9.766
9.46	17.395
6.409	10.986
14.954	9.613
12.207	7.324
12.207	12.665
14.038	11.902
10.071	33.875
12.207	11.444
12.512	11.139
10.376	7.935
11.292	12.207
16.479	18.463
10.376	16.022
10.986	11.292
14.038	12.36
11.902	19.989
12.512	14.496
10.681	16.632
29.297	15.411
9.766	22.888
7.019	13.886
14.038	12.36
12.817	9.46
10.681	16.174
7.935	39.673
19.531	17.09
21.057	13.58
13.123	10.223
7.935	26.703
14.954	23.651
28.992	11.444
18.311	14.191
8.24	12.054
10.681	12.36
10.681	38.147
16.479	7.019
7.324	9.46
9.155	10.376
12.512	7.629
10.071	11.597
8.85	11.597
9.155	14.648
9.155	12.817
14.038	77.82
13.123	9.613
13.733	13.733
22.888	12.97
7.935	17.09
13.733	16.327
8.85	12.207
11.292	14.191
12.817	10.223
10.681	15.259
23.499	23.193
14.038	8.24
39.673	13.275
13.123	11.597
15.564	14.038
11.292	11.292
14.954	23.499
7.629	30.212
12.817	19.989
8.24	9.155
16.479	28.229
30.823	14.496
9.155	11.444
22.888	8.698
18.005	27.008
5.188	14.496
7.629	66.528
14.343	14.191
17.09	9.155
10.071	35.248
24.414	12.054
8.24	27.771
15.869	42.267
10.986	36.621
9.155	24.872
10.376	14.191
11.902	33.722
9.155	14.801
13.733	9.766
7.324	12.512
11.292	18.463
9.46	38.605
12.817	13.58
9.766	12.207
10.376	36.621
12.207	20.142
7.935	29.602
19.531	13.58
13.733	21.82
8.85	27.161
10.071	8.087
17.395	31.738
8.24	35.553
10.986	7.477
12.207	11.597
15.869	43.488
10.986	13.123
9.766	9.46
21.973	23.499
20.447	13.123
13.733	12.817
11.597	45.624
9.155	25.33
8.545	22.278
10.681	11.902
10.376	12.512
8.24	10.071
10.376	29.907
10.071	10.376
8.545	13.733
8.24	20.905
10.071	12.665
18.005	20.142
6.714	42.114
10.681	22.888
8.24	15.259
8.24	12.97
10.681	15.869
10.376	31.586
6.409	12.665
8.24	25.94
11.292	21.21
11.292	14.038
9.46	14.038
21.362	37.079
7.935	41.046
10.376	18.158
14.648	14.191
11.597	11.902
17.7	14.954
10.376	18.463
22.278	14.496
16.479	19.226
13.428	16.937
10.376	9.918
10.071	78.125
6.104	13.58
14.648	10.071
12.512	8.392
6.409	13.428
10.071	22.125
7.324	40.131
10.986	39.063
10.071	30.212
11.902	19.379
8.85	26.703
7.935	17.853
14.038	12.054
18.616	39.215
15.869	45.319
10.986	12.817
7.019	17.395
11.292	8.698
11.597	28.229
32.349	19.073
10.986	11.444
16.785	14.191
10.986	19.073
15.564	21.362
13.123	13.886
16.174	50.049
7.324	10.376
7.324	8.698
10.071	7.172
7.324	19.989
11.597	39.673
7.629	9.766
9.155	6.561
53.711	14.038
8.24	49.591
9.766	17.242
15.564	9.155
7.935	13.123
11.597	16.022
7.629	9.46
9.46	15.411
7.629	11.749
15.869	52.49
8.85	7.477
6.714	14.801
11.597	12.207
11.292	17.242
6.104	14.343
7.324	20.142
7.019	7.172
20.447	12.36
33.264	10.834
8.85	7.782
8.24	18.005
11.292	11.139
7.935	10.376
7.935	7.629
10.986	20.599
30.212	8.85
7.629	22.278
9.46	9.46
7.629	8.087
10.071	14.801
7.019	16.174
17.7	18.463
7.935	20.294
7.019	7.477
6.714	19.073
10.071	10.529
9.155	8.24
15.259	7.629
8.545	9.155
11.292	10.223
11.292	8.85
9.155	25.177
10.681	10.529
8.85	8.392
8.545	20.599
10.986	11.139
7.935	8.85
10.986	21.667
7.935	11.749
8.85	101.166
12.817	30.823
8.24	18.463
11.902	14.191
18.616	8.24
7.019	9.918
5.188	8.392
6.714	8.698
10.071	22.125
7.935	27.924
6.104	7.477
7.935	8.545
9.766	5.798
5.493	6.866
16.785	8.85
7.324	8.545
9.46	9.918
10.071	6.256
8.85	6.409
17.7	9.46
11.902	6.866
18.005	15.106
8.85	8.087
9.155	10.071
6.714	22.888
10.071	22.43
8.545	11.444
11.292	34.485
9.155	28.229
6.714	13.428
8.24	17.242
10.681	6.409
8.85	7.019
6.104	9.155
6.714	7.324
8.24	10.529
8.545	7.019
7.935	7.782
9.155	8.392
10.071	8.545
7.935	15.564
8.24	7.935
89.111	8.545
18.311	9.003
8.24
22.583
9.46
9.766
15.564
11.902
12.512
9.46
7.324
7.629
16.174
18.616
15.259
14.343
18.616
20.447
10.986
10.681
7.629
14.343
12.817
12.207
9.46
25.024
13.123
9.155
15.564
7.935
12.207
12.817
9.766
12.207
10.986
8.545
13.733
11.292
10.376
8.545
25.635
12.512
10.376
14.343
7.324
8.545
11.292
12.817
10.986
18.005
66.528
10.376
13.123
12.512
8.24
13.123
7.324
11.597
8.85
32.654
39.063
10.376
12.207
19.226
14.038
23.193
8.545
10.986
30.518
14.038
13.428
9.766
15.564
40.894
11.902
15.564
16.174
24.719
9.46
18.311
8.85
7.935
25.94
13.428
9.46
7.935
16.785
9.155
8.545
10.986
21.362
8.24
12.512
9.155
20.752
14.954
10.376
9.46
11.292
8.85
8.85
13.428
10.071
7.629
8.545
20.142
17.395
7.324
10.376
9.46
9.155
12.817
10.071
11.292
7.935
23.499
14.343
10.071
85.449
6.714
13.123
23.804
9.155
10.681
6.714
15.869
7.935
5.798
14.038
4.883
7.935
13.123
12.207
10.376
25.94
5.798
9.766
13.733
8.545
7.935
10.681
10.376
13.123
8.545
8.85
15.259
14.954
11.597
7.324
11.292
18.311
11.597
12.817
35.4
10.681
20.447
9.46
7.324
15.564
7.324
9.46
10.376
7.324
6.409
11.902
7.019
25.94
13.428
10.376
21.362
7.019
5.798
14.343
10.071
20.142
13.123
19.836
10.071
44.861
21.362
32.654
8.545
12.817
8.545
13.123
7.324
7.935
13.123
13.733
11.902
22.278
16.785
9.46
12.207
14.954
7.629
7.629
24.109
7.019
7.935
13.428
7.019
7.324
12.512
10.071
18.616
12.817
12.207
14.954
8.85
6.714
8.545
8.85
11.292
7.935
8.545
11.597
14.038
14.343
13.733
8.24
6.104
19.226
8.545
7.629
8.85
14.343
7.935
12.512
19.226
9.766
5.798
5.493
39.063
10.071
7.019
8.85
7.019
6.409
14.648
16.785
7.019
6.714
12.512
25.94
8.85
8.24
7.935
7.324
6.409
8.85
5.798
7.629
8.545
12.512
6.714
9.155
8.85
30.212
10.986
18.921
15.259
15.564
16.479
16.174
66.528
12.817
12.512
10.376
7.019
10.376
11.597
20.447
15.564
11.292
18.311
10.681
14.648
10.681
6.714
7.935
7.324
23.804
7.019
10.681
8.545
9.46
24.414
8.85
31.433
6.409
7.935
12.512
10.071
17.395
11.292
7.629
15.259
7.629
7.935
8.85
29.602
27.466
10.071
11.902
7.324
13.428
8.24
17.09
20.447
11.292
11.597
12.817
8.545
7.629
8.545
7.629
26.245
13.428
10.681
10.681
15.869
10.376
10.376
9.46
8.85
9.766
18.005
11.292
12.207
6.104
18.311
8.85
10.071
12.512
8.24
12.817
9.766
8.24
8.545
18.005
10.376
18.921
5.798
10.681
17.7
9.155
7.935
15.564
10.986
8.85
11.292
18.616
10.681
13.123
9.766
18.005
12.207
8.85
14.038
12.512
8.85
13.733
10.986
14.038
9.766
7.935
10.681
8.545
12.207
9.766
8.24
11.902
18.921
19.226
18.005
12.207
10.376
14.038
8.85
10.376
10.986
10.986
8.85
8.24
15.259
9.766
20.142
7.935
6.409
33.569
16.479
17.395
7.935
12.207
11.597
7.935
9.46
14.648
8.24
8.24
13.428
9.155
8.24
12.512
8.545
15.869
10.376
10.071
11.902
11.597
12.207
8.545
18.005
8.24
6.104
11.292
13.123
6.409
10.071
10.071
7.935
7.629
10.681
12.207
10.376
15.564
11.597
9.766
8.85
5.798
9.155
8.85
10.986
6.409
13.428
10.376
8.85
82.092
7.019
10.681
10.071
13.123
11.292
5.798
13.733
12.512
7.629
10.071
12.207
11.902
9.155
10.376
15.259
11.902
14.343
7.019
10.376
9.46
8.24
6.409
7.935
10.681
7.935
7.019
6.104
11.902
9.46
7.324
11.902
9.155
8.24
7.629
9.155
9.766
9.766
11.597
5.493
42.114
15.259
11.292
10.071
9.46
10.376
7.935
8.545
7.324
11.292
11.902
11.292
7.019
10.071
10.071
7.935
9.766
14.648
9.155
8.85
18.616
6.409
7.324
19.226
9.766
5.798
14.343
13.123
9.155
12.207
8.24
8.24
6.714
7.324
7.935
12.512
13.733
8.85
9.46
8.545
9.155
8.85
19.226
5.188
12.512
7.324
13.733
9.46
11.292
9.766
11.292
11.292
9.46
13.123
7.019
12.512
7.935
8.85
7.935
8.24
6.409
10.071
6.409
30.518
47.913
10.376
17.395
12.512
7.629
13.733
14.954
8.545
11.292
7.935
18.005
9.155
10.376
8.85
11.597
9.766
6.104
13.123
27.161
9.155
18.311
11.597
10.071
11.597
19.531
9.46
10.376
7.935
13.428
8.545
10.071
5.798
10.681
15.869
10.376
14.648
8.545
7.629
21.973
9.155
24.414
6.714
37.537
6.409
15.869
8.85
8.24
7.324
4.883
7.629
7.935
10.681
12.817
7.935
7.019
9.766
16.785
6.104
11.292
8.545

## Sheet: 3F
Measurements are individual evoked peak amplitudes (pA)
Example traces in 3F came from bolded files
			Time (s):
Condition:	File name:		0	10	20	30	40	50	60	70	80	90		150	160	170	180	190	200	210	220	230	240	250	260	270	280	290	300	310	320	330	340	350	360	370	380	390	400	410	420	430	440	450	460	470	480	490	500
2 min no drug	2019_04_17_0004	raw amplitude (pA)	-4619.67	-4224.55	-4221.44	-4242.14	-4145.04	-4190.36	-4099.53	-4185.21	-4140.49	-4132.12								-4030.35	-3707.97	-3646.22	-3771.92	-3729.34	-3765.78	-3759.63	-3770.28	-3769.12	-3813.48	-3851.92	-3784.46	-3882.22	-3819.15	-3862.95	-3965.01	-3884.58	-3837.1	-3890.4	-3774.6	-3812.12	-3772.31	-3707.5	-3814.69	-3757.58	-3716.09	-3786.83	-3831.5
		% 1st response	100	91.447	91.3798	91.8279	89.726	90.7069	88.7408	90.5956	89.6275	89.4464								87.2434	80.2649	78.9281	81.6492	80.7274	81.5162	81.3832	81.6138	81.5885	82.5489	83.3809	81.9207	84.0369	82.6716	83.6198	85.829	84.0879	83.0602	84.2139	81.7073	82.5194	81.6577	80.2548	82.575	81.3388	80.4408	81.972	82.9389
2 min no drug	2019_04_17_0005	raw amplitude (pA)	-3739.31	-3409.86	-3041.89	-3236.45	-3137.05	-3199.95	-3198.36	-3125.52	-3348.92	-3248.93								-3829.01	-3498.84	-3448.18	-3426.86	-3130.37	-3287.36	-3255.67	-3212.77	-3122.01	-3289.87	-3338.96	-3337.02	-2874.51	-3288.77	-2990.11	-3075.42	-3104.23	-2833.26	-3079.22	-2891.29	-2913.95	-3062.73	-2963.16	-3067.91	-3038.92	-2812.27	-3024.21	-3060.78	-3078.12	-3120.67
		% 1st response	100	91.1897	81.349	86.552	83.894	85.576	85.5334	83.5855	89.5598	86.8858								102.399	93.5691	92.2145	91.6442	83.7152	87.9135	87.0661	85.9189	83.4916	87.9807	89.2936	89.2416	76.8728	87.9512	79.9643	82.2456	83.0161	75.7695	82.3472	77.3214	77.9275	81.9064	79.2435	82.0449	81.2696	75.2084	80.8763	81.8542	82.318	83.4559
2 min no drug	2019_04_17_0006	raw amplitude (pA)	-3908.91	-3568.51	-3466.55	-3389.06	-3366.19	-3280.78	-3177.6	-3159.26	-3052.97	-3053.52								-3177.63	-3001.84	-2886.16	-2802.42	-2773.92	-2717.73	-2685.74	-2641.62	-2606.11	-2578.68	-2583.99	-2569.31	-2593.2	-2544.42	-2497.65	-2461.93	-2473.32	-2469.86	-2467.34	-2430.21
		% 1st response	100	91.2917	88.6833	86.7008	86.1157	83.9309	81.2911	80.8219	78.1028	78.1169								81.2919	76.7949	73.8354	71.6931	70.964	69.5264	68.708	67.5794	66.6709	65.9693	66.1051	65.7296	66.3408	65.0927	63.8962	62.9824	63.2738	63.1854	63.1209	62.171
2 min no drug	2019_04_17_0007	raw amplitude (pA)	-3871.44	-3572.5	-3424.84	-3296.26	-3267.44	-3148.77	-3127.4	-3128.83	-3051.84	-3048.72								-3473.76	-3143.82	-2995.23	-2988.64	-2894.11	-2875.3	-2847.03	-2812.83	-2797.66	-2796.66	-2756.03	-2793.49	-2662.84	-2677.83	-2701.79	-2654.02	-2599.69	-2697.07	-2662.17	-2615.83	-2627.16	-2640.29	-2591.37	-2614.77	-2622.56	-2606.07	-2579.8	-2580	-2566.1	-2571.33
		% 1st response	100	92.2782	88.4642	85.1429	84.3986	81.3332	80.7812	80.8182	78.8297	78.749								89.7279	81.2053	77.3674	77.1971	74.7553	74.2694	73.5392	72.656	72.264	72.2382	71.1886	72.1564	68.7815	69.1688	69.7876	68.5539	67.1504	69.6658	68.7643	67.5672	67.86	68.1992	66.9356	67.5399	67.7413	67.3151	66.6366	66.6418	66.2829	66.418
2 min no drug	2019_04_19_0000	raw amplitude (pA)	-3432.38	-3305.74	-3045.42	-3015.29	-2830.99	-2940.08	-2965.19	-2836.66	-2886.23	-2734.66								-2876.75	-2504.82	-2472.75	-2427.39	-2298.78	-2296.07	-2238.68	-2214.81	-2259.82	-2187.49	-2161.58	-2189.25	-2137.66	-2157.46	-2119.38	-2185.32	-2103.25	-2120.32	-2119.37	-2176.37	-2040.14	-2004.06	-1986.97	-2071.24	-2038.26	-1989.36	-1896.4	-1896.92	-1883.85	-1834.57
		% 1st response	100	96.3104	88.7261	87.8484	82.4789	85.6572	86.3886	82.6441	84.0883	79.6725								83.812	72.9763	72.0418	70.7202	66.9733	66.8944	65.2223	64.5269	65.8384	63.731	62.9761	63.7823	62.2793	62.8562	61.7467	63.6678	61.2766	61.7742	61.7463	63.407	59.4382	58.3868	57.8891	60.3442	59.3833	57.9585	55.2502	55.2653	54.8848	53.449
2 min no drug	2019_04_19_0002	raw amplitude (pA)	-3823.93	-3473.9	-3529.6	-3446.63	-3549.46	-3572.27	-3521.02	-3545.92	-3668.74	-3466.96								-4647.65	-4166.98	-4234.68	-4136.86	-4079.82	-4008.97	-4044.76	-4336.74	-4125.17	-4101.15	-4130.27	-3976.03	-3978.67	-4193.17	-3935.18	-4084.54	-3945.94	-4202.31	-4017.58	-4112.99
		% 1st response	100	90.8465	92.303	90.1334	92.8222	93.419	92.0786	92.7297	95.9417	90.6649								121.541	108.971	110.742	108.184	106.692	104.839	105.775	113.411	107.878	107.25	108.011	103.978	104.047	109.656	102.909	106.815	103.191	109.895	105.064	107.559
8 min no drug	2017_09_07_0007	raw amplitude (pA)	-2658.07	-2555.83	-2474.13	-2461.21	-2482.93	-2491.59	-2509.65	-2428.04	-2502.28	-2410.64
		% 1st response	100	96.1536	93.0798	92.5938	93.4108	93.7368	94.416	91.3458	94.139	90.6912
8 min no drug	2017_09_07_0010	raw amplitude (pA)	-2279.59	-2174.67	-2088.47	-2046.45	-2074.67	-2064.85	-2052.46	-1985.41	-2057.3	-2018.22
		% 1st response	100	95.3971	91.6161	89.7724	91.0103	90.5797	90.0362	87.0951	90.2485	88.5344
8 min no drug + Bic	2017_12_04_0000	raw amplitude (pA)	-2906.61	-2780.65	-2766.64	-2738.49	-2750.37	-2731.11	-2718.22	-2709.56	-2722.23	-2721.38
		% 1st response	100	95.6662	95.1844	94.2159	94.6245	93.9618	93.5185	93.2206	93.6564	93.6271
8 min no drug + Bic	2017_12_04_0004	raw amplitude (pA)	-6101.07	-5891.04	-5792.51	-5749.05	-5681.6	-5650.36	-5607.43	-5557.63	-5498.35	-5471.41
		% 1st response	100	96.5575	94.9425	94.2301	93.1246	92.6125	91.9089	91.0927	90.121	89.6794
8 min no drug + Bic	2017_12_05_0000	raw amplitude (pA)	-7048.21	-6675.18	-6559.52	-6475.92	-6407.75	-6321.58	-6315.94	-6272.57	-6204.81	-6182.86
		% 1st response	100	94.7075	93.0665	91.8804	90.9132	89.6906	89.6106	88.9953	88.0339	87.7224
8 min no drug + Bic	2017_12_05_0004	raw amplitude (pA)	-4363.38	-4185.35	-4106.48	-4076.67	-4066.37	-3999.46	-3964.97	-3887.15	-3800.61	-3775.07
		% 1st response	100	95.9199	94.1123	93.4292	93.1931	91.6596	90.8692	89.0858	87.1024	86.5173
8 min no drug + Bic	2017_12_05_0013	raw amplitude (pA)	-4039.88	-3942.21	-3839.38	-3836.71	-3850.42	-3812.88	-3775.44	-3727.74	-3647.27	-3646.67
		% 1st response	100	97.5826	95.0371	94.9709	95.3104	94.3811	93.4544	92.2735	90.2816	90.2669
1 min PTX	2019_04_16_0001	raw amplitude (pA)	-1674.68	-1895.27	-1905.57	-1856.05	-1532.29	-1831.76	-1429.48	-1504.34	-1824.44	-1517.44		-1206.68	-1213.99	-895.13	-973.714	-883.474	-837.833	-631.917	-652.968	-677.08	-594.94	-548.845	-567.615	-462.335	-377.584	-460.429	-422.948	-413.554	-421.56	-409.169	-337.128	-284.428	-345.253	-346.197	-288.724	-274.994	-295.388	-278.964	-283.46	-285.55	-242.934
		% 1st response	100	113.172	113.787	110.83	91.4974	109.38	85.3583	89.8282	108.943	90.6105		72.0541	72.4905	53.4507	58.1431	52.7547	50.0293	37.7335	38.9905	40.4303	35.5255	32.773	33.8939	27.6073	22.5466	27.4935	25.2554	24.6945	25.1725	24.4326	20.1308	16.984	20.616	20.6724	17.2405	16.4206	17.6384	16.6577	16.9262	17.051	14.5063
1 min PTX	2019_04_16_0003	raw amplitude (pA)	-6663.9	-6132.98	-5963.84	-5784.72	-5781.18	-5764.56	-5638.98	-5648.29	-5569.54	-9927.93		-4988.83	-4034.02	-3542.36	-3085	-2760.89	-2513.64	-2349.14	-2181.55	-2064.36	-1896.87	-1799.41	-1695.43	-1593.07	-1501.83	-1458.74	-1385.83	-1277.91	-1250.61	-1189.5	-1118.9	-1043.97	-996.553	-969.295	-932.284	-880.764	-880.512	-861.321	-817.11	-773.919	-745.618
		% 1st response	100	92.033	89.4947	86.8068	86.7537	86.5044	84.6199	84.7595	83.5777	148.981		74.8636	60.5354	53.1575	46.2941	41.4305	37.7202	35.2517	32.7369	30.9782	28.4649	27.0023	25.4421	23.9059	22.5369	21.8902	20.796	19.1766	18.767	17.8499	16.7905	15.666	14.9545	14.5455	13.9901	13.217	13.2132	12.9252	12.2617	11.6136	11.1889
1 min PTX	2019_04_16_0006	raw amplitude (pA)	-3083.09	-2625.02	-2504.64	-2688.43	-2765.46	-3100.14	-2926.39	-2853.46	-2867.05	-3119.32		-2297.29	-1799.36	-1182.59	-1125.09	-826.524	-760.773	-747.582	-202.295	-142.019	-123.844	-97.5896	-86.1628	-101.535	-87.1656	-86.4426	-71.2647	-71.736	-70.2941	-59.8079	-58.7099	-77.4776	-57.8863	-58.5313	-67.57	-62.9122	-59.5172	-52.2808	-45.5107	-55.3313	-45.698
		% 1st response	100	85.1426	81.2381	87.1991	89.6978	100.553	94.9176	92.5519	92.9927	101.175		74.5125	58.3621	38.3572	36.4924	26.8083	24.6757	24.2478	6.56144	4.6064	4.0169	3.16532	2.79469	3.29328	2.82722	2.80377	2.31147	2.32676	2.27999	1.93987	1.90425	2.51299	1.87754	1.89846	2.19163	2.04056	1.93044	1.69573	1.47614	1.79467	1.48221
1 min PTX	2019_04_16_0008	raw amplitude (pA)	-3401.06	-3420.24	-3385.34	-3225.81	-3288.92	-3242.47	-3193.49	-3186.85	-3233.26	-3248.85		-3195.62	-2569.93	-2376.85	-2183.25	-2022.02	-1796.66	-1701.66	-1637.94	-1494.71	-1438.74	-1388.98	-1335.09	-1263.04	-1194.99	-1098.19	-1036.23	-1006.24	-963.04	-918.488	-886.966	-860.195	-820.438	-792.958	-747.659	-731.715	-704.031	-678.383	-682.715	-667.863	-654.8
		% 1st response	100	100.564	99.5379	94.8474	96.703	95.337	93.8971	93.7017	95.0663	95.5246		93.9595	75.5627	69.8856	64.1932	59.4528	52.8265	50.0333	48.1599	43.9485	42.3027	40.8398	39.2553	37.1367	35.1358	32.2898	30.4678	29.5862	28.3159	27.006	26.0791	25.292	24.1231	23.3151	21.9831	21.5143	20.7004	19.9463	20.0736	19.6369	19.2528
1 min PTX	2019_04_17_0003	raw amplitude (pA)	-4126.96	-3920.53	-3974.76	-3933.19	-3798.93	-3739.4	-3647.99	-3702.4	-3557.51	-3449.26		-2566.17	-2283.64	-2000.25	-1858.18	-1646.45	-1676.5	-1529.43	-1490.77	-1416.02	-1214.91	-1260.67	-1175.45	-1128.55	-1067.91	-971.144	-959.777	-933.013	-840.711	-811.836	-762.517	-753.459	-718.049	-710.053	-679.02	-681.284	-609.557	-602.825	-595.842	-552.221	-499.288
		% 1st response	100	94.9981	96.312	95.3046	92.0514	90.609	88.394	89.7126	86.2017	83.5786		62.1805	55.3346	48.4679	45.0255	39.895	40.6231	37.0596	36.1226	34.3115	29.4384	30.5471	28.4821	27.3459	25.8765	23.5317	23.2563	22.6078	20.3712	19.6715	18.4765	18.257	17.399	17.2052	16.4533	16.5081	14.7701	14.607	14.4378	13.3808	12.0982
2 min PTX	2019_04_16_0000	raw amplitude (pA)	-1621.4	-1417.72	-1336.96	-1317.48	-1318.25	-1268.02	-1264.46	-1315.42	-1270.77	-1246.37								-846.344	-789.429	-546.823	-509.728	-465.664	-404.945	-401.346	-349.444	-338.927	-318.791	-296.102	-288.173	-265.938	-254.226	-240.208	-221.876	-221.478	-192.176	-188.036	-187.257	-172.993	-186.708	-155.431	-158.283	-158.818	-140.444	-147.029	-134.992	-123.025	-127.286
		% 1st response	100	87.4378	82.4573	81.2556	81.3032	78.205	77.9855	81.1288	78.3746	76.8701								52.1983	48.688	33.7253	31.4375	28.7198	24.975	24.753	21.5519	20.9033	19.6614	18.2621	17.7731	16.4017	15.6794	14.8148	13.6842	13.6596	11.8525	11.5972	11.549	10.6694	11.5152	9.5862	9.76213	9.79512	8.6619	9.06802	8.32564	7.58758	7.85034
2 min PTX	2019_04_16_0002	raw amplitude (pA)	-3191.54	-3084.1	-2941.84	-3004.8	-3164.04	-3443.86	-2961.98	-2929.03	-3040.19	-3043.56								-1568.47	-1374.34	-1177.76	-772.269	-652.476	-617.032	-594.041	-523.036	-512.317	-903.243	-786.659	-758.568	-399.263	-362.832	-370.502	-580.495	-570.683	-262.003	-311.953	-269.47	-286.765	-250.826	-263.541	-264.277	-433.211	-438.316	-430.355	-414.449	-401.841	-407.545
		% 1st response	100	96.6334	92.1763	94.1489	99.1383	107.906	92.8073	91.7749	95.2578	95.3633								49.1446	43.0619	36.9025	24.1974	20.4439	19.3334	18.613	16.3882	16.0523	28.3011	24.6482	23.7681	12.51	11.3685	11.6089	18.1885	17.8811	8.20929	9.77438	8.44325	8.98517	7.8591	8.25749	8.28055	13.5737	13.7337	13.4842	12.9859	12.5908	12.7695
2 min PTX	2019_04_16_0007	raw amplitude (pA)	-3897.34	-3638.5	-3593.11	-3724.3	-3506.1	-3633.74	-3588.24	-3572.28	-3570.62	-3635.61								-3102.26	-2616.71	-2434.49	-2234.88	-2083.12	-1965.31	-1838.36	-1736.46	-1604.26	-1532.98	-1440.48	-1390.88	-1342.09	-1234.35	-1216.15	-1141.86	-1122.57	-1026.04	-1004.44	-941.185	-930.52	-879.827	-875.865	-817.226	-840.073	-784.695	-784.393	-735.304	-728.235	-690.476
		% 1st response	100	93.3586	92.1939	95.5599	89.9613	93.2364	92.0688	91.6594	91.6167	93.2842								79.5993	67.1408	62.4653	57.3437	53.4496	50.4269	47.1695	44.555	41.1629	39.334	36.9606	35.6878	34.4361	31.6715	31.2047	29.2985	28.8033	26.3266	25.7724	24.1494	23.8757	22.5751	22.4734	20.9688	21.555	20.1341	20.1263	18.8668	18.6854	17.7166
2 min PTX	2019_04_17_0001	raw amplitude (pA)	-5591.56	-5116.7	-4887.21	-4801	-4822.73	-4735.61	-4678.78	-4538.43	-4626	-4442.1								-3970.45	-3228.35	-2932.55	-2628.96	-2611.53	-2526.12	-2331.51	-2307.11	-2097.57	-2130.83	-2014.72	-1945.46	-1850.12	-1834.82	-1787.72	-1641.43	-1672.56	-1596.41	-1539.21	-1537.53	-1483.86	-1407.8	-1449.99	-1370.51	-1334.47	-1273.17	-1278.04	-1210.28	-1220.71	-1149.89
		% 1st response	100	91.5075	87.4034	85.8616	86.2502	84.6921	83.6758	81.1656	82.7319	79.4429								71.008	57.7361	52.446	47.0166	46.7048	45.1774	41.6969	41.2606	37.5131	38.1079	36.0314	34.7929	33.0876	32.8141	31.9718	29.3555	29.9123	28.5504	27.5273	27.4974	26.5375	25.1772	25.9318	24.5104	23.8658	22.7695	22.8566	21.6448	21.8312	20.5648
2 min PTX	2019_04_19_0001	raw amplitude (pA)	-1286	-1053.09	-1095.26	-1141.03	-1098.92	-1172.75	-1148.9	-1936.96	-1157.24	-1096.67								-363.591	-203.343	-183.524	-162.995	-148.226	-121.846	-128.404	-94.6506	-91.4786	-96.5807	-83.0311	-63.7404	-76.1661	-73.3823	-54.2611	-61.2657	-64.9435	-59.1695	-53.5969	-50.0117	-42.2635	-37.3294	-41.341	-44.565	-44.0318	-35.759	-31.4823	-38.6671	-41.4122	-32.7737
		% 1st response	100	81.8886	85.1678	88.7271	85.4522	91.1931	89.3386	150.619	89.9871	85.2775								28.273	15.812	14.2709	12.6745	11.5261	9.47479	9.98475	7.36006	7.11341	7.51015	6.45652	4.95647	5.9227	5.70623	4.21936	4.76404	5.05003	4.60104	4.16771	3.88892	3.28642	2.90275	3.21469	3.46539	3.42393	2.78063	2.44808	3.00677	3.22022	2.5485
5 min PTX	2017_10_05_0026	raw amplitude (pA)	-5853.24	-5856.97	-5618.7	-5585.14	-5529.68	-5503.04	-5515.88	-5352.69	-5268.86	-5212.81																									2017_10_05_0028	-711.074	-646.942	-537.476	-480.095	-464.345	-401.373	-384.665	-338.355	-342.685	-303.341	-302.215	-298.157
		% 1st response	100	100.064	95.9929	95.4197	94.4721	94.017	94.2364	91.4483	90.0161	89.0585																										12.1484	11.0527	9.18253	8.2022	7.93313	6.85728	6.57184	5.78064	5.85462	5.18245	5.16321	5.09388
5 min PTX	2017_10_05_0037	raw amplitude (pA)	-3837.69	-3771.56	-3805.18	-3877.45	-3857.61	-3954.35	-3943.8	-3881.8	-3810.33	-4090.45																									2017_10_05_0039	-1146.5	-962.91	-842.167	-778.575	-745.916	-682.793	-625.478	-615.435	-567.149	-533.78	-529.477	-492.649
		% 1st response	100	98.2769	99.153	101.036	100.519	103.04	102.765	101.149	99.287	106.586																										29.8747	25.0909	21.9446	20.2876	19.4366	17.7918	16.2983	16.0366	14.7784	13.9089	13.7968	12.8371
5 min PTX	2017_10_13_0003	raw amplitude (pA)	-4523.05	-4199.97	-4250.56	-4146.68	-4146.81	-4201	-4315.61	-4278.92	-4347.57	-4411.23																									2017_10_13_0005	-2218.02	-1814.4	-1655.69	-1498.34	-1383.35	-1248.02	-1210.76	-1159.15	-1019.09	-954.551	-925.135	-865.808
		% 1st response	100	92.857	93.9756	91.6789	91.6817	92.88	95.4137	94.6026	96.1204	97.5278																										49.0382	40.1146	36.6056	33.1268	30.5845	27.5924	26.7687	25.6276	22.531	21.1042	20.4538	19.1421
5 min PTX	2017_10_13_0006	raw amplitude (pA)	-3886.02	-3711.29	-3597.65	-3536.91	-3502.16	-3471.26	-3403.62	-3371.59	-3318.21	-3334.87																									2017_10_13_0008	-1240.99	-1052.13	-952.732	-890.409	-839.593	-771.927	-737.337	-688.252	-685.141	-632.553	-602.977	-576.032
		% 1st response	100	95.5035	92.5792	91.0163	90.1219	89.3268	87.5862	86.762	85.3885	85.817																										31.9346	27.0748	24.5169	22.9131	21.6054	19.8642	18.9741	17.711	17.6309	16.2776	15.5166	14.8232
5 min PTX	2017_10_13_0009	raw amplitude (pA)	-4738.54	-4424.48	-4435.28	-4429.52	-4348.38	-4300.8	-4228.33	-4184.52	-4169.3	-4093.74																									2017_10_13_0011	-1704.64	-1345.84	-1260.18	-1127.05	-1056.98	-976.805	-916.249	-856.584	-781.19	-737.187	-690.019	-646.245
		% 1st response	100	93.3722	93.6001	93.4785	91.7662	90.7622	89.2328	88.3082	87.9871	86.3925																										35.974	28.4021	26.5943	23.7848	22.306	20.614	19.3361	18.077	16.4859	15.5573	14.5618	13.6381
8 min PTX	2017_06_23_0003	raw amplitude (pA)	-1174.79	-993.288	-886.284	-854.882	-811.284	-868.996	-847.519	-763.672	-846.35	-860.378
		% 1st response	100	84.5506	75.4421	72.7692	69.058	73.9706	72.1424	65.0052	72.0429	73.237
8 min PTX	2017_06_23_0006	raw amplitude (pA)	-877.679	-976.281	-1064.07	-928.024	-999.461	-1008.31	-985.824	-946.41	-803.488	-896.844
		% 1st response	100	111.234	121.237	105.736	113.875	114.883	112.322	107.831	91.547	102.184
8 min PTX	2017_06_23_0009	raw amplitude (pA)	-1480.77	-1501.2	-1391.89	-1455.44	-1410.16	-1409.04	-1466.2	-1349.87	-1385.54	-1502.73
		% 1st response	100	101.379	93.9971	98.2894	95.2312	95.1557	99.0157	91.1596	93.5687	101.483
8 min PTX	2017_07_12_0000	raw amplitude (pA)	-5997.1	-5519.41	-5390.64	-5281.58	-5144.3	-5073.85	-5027.22	-4929.71	-4920.45	-4893.19
		% 1st response	100	92.0347	89.8874	88.0689	85.7797	84.6051	83.8275	82.2015	82.0471	81.5925
8 min PTX	2017_07_12_0003	raw amplitude (pA)	-5287.54	-4720.07	-4514.24	-4480.98	-4293.34	-4181.62	-4160.83	-4131.37	-4054.39	-4008.13
		% 1st response	100	89.2678	85.3749	84.7459	81.1973	79.0844	78.6912	78.134	76.6782	75.8032
8 min PTX	2017_07_12_0006	raw amplitude (pA)	-5697.9	-5299.64	-5218.63	-5162.83	-5175.26	-5113.03	-5046.5	-4976.69	-4907.61	-4867.23
		% 1st response	100	93.0103	91.5887	90.6093	90.8275	89.7352	88.5677	87.3425	86.1301	85.4215
8 min PTX	2017_07_12_0009	raw amplitude (pA)	-7117.93	-6676.38	-6465.04	-6320.41	-6349.06	-6252.93	-6168.25	-6130.19	-6036.36	-5939.16
		% 1st response	100	93.7966	90.8276	88.7957	89.1981	87.8476	86.6579	86.1232	84.8049	83.4393
8 min PTX	2017_07_12_0012	raw amplitude (pA)	-5991.9	-5724.61	-5575.11	-5478.06	-5484.76	-5417.22	-5391.07	-5353.95	-5387.95	-5349.88
		% 1st response	100	95.5392	93.0441	91.4245	91.5362	90.4091	89.9727	89.3532	89.9207	89.2852
8 min PTX	2017_10_13_0012	raw amplitude (pA)	-3560.33	-3440.75	-3375.74	-3333.96	-3249.26	-3269.95	-3207.18	-3285.06	-3149.99	-3158.95
		% 1st response	100	96.6412	94.8155	93.6418	91.263	91.8441	90.081	92.2686	88.4746	88.7265
8 min PTX	2017_10_13_0015	raw amplitude (pA)	-4120.54	-3812.72	-3676.62	-3556.3	-3537.65	-3456.25	-3472.69	-3394.85	-3419.19	-3471.53
		% 1st response	100	92.5296	89.2265	86.3066	85.854	83.8784	84.2776	82.3885	82.979	84.2492
8 min PTX	2017_10_13_0018	raw amplitude (pA)	-4888.43	-4556.49	-4558.52	-4447.83	-4350.68	-4284.68	-4187.04	-4058.92	-3950.58	-3879.33
		% 1st response	100	93.2097	93.2511	90.9869	88.9996	87.6494	85.652	83.0312	80.8149	79.3574
8 min Bicuculline	2018_02_02_0000	raw amplitude (pA)	-3842.91	-3618.42	-3553.89	-3501.29	-3443.49	-3409.42	-3292.47	-3276.37	-3273.69	-3184.22
		% 1st response	100	94.1585	92.4793	91.1105	89.6065	88.7198	85.6766	85.2576	85.1878	82.8597
8 min Bicuculline	2018_02_02_0003	raw amplitude (pA)	-2601.08	-2498.45	-2505.76	-2497.44	-2582.57	-2592.54	-2473.46	-2426.03	-2397.59	-2376.17
		% 1st response	100	96.0544	96.3356	96.0155	99.2883	99.6719	95.0936	93.2703	92.1769	91.3531
8 min Bicuculline	2018_02_02_0006	raw amplitude (pA)	-3777.02	-3619.07	-3549.23	-3543.72	-3503.61	-3451.19	-3437.6	-3412.32	-3239.26	-3278.12
		% 1st response	100	95.8182	93.969	93.8232	92.7613	91.3736	91.0137	90.3443	85.7624	86.7914
8 min Bicuculline	2018_02_03_0003	raw amplitude (pA)	-5470.1	-5037.6	-5151.74	-5243.37	-5197.74	-5259.43	-5488.25	-5489.24	-5526.6	-5620
		% 1st response	100	92.0934	94.18	95.8551	95.0209	96.1487	100.332	100.35	101.033	102.74
8 min TTX	2018_02_02_0009		-3860.42	-3770.13	-3682.55	-3622.58	-3555.15	-3533.39	-3449.45	-3349.53	-3367.06	-3372.23
			100	97.661	95.3924	93.839	92.0922	91.5286	89.3542	86.7659	87.22	87.354
8 min TTX	2018_02_03_0000		-3901.55	-3717.46	-3592.36	-3534.17	-3406.25	-3343.93	-3229.43	-3215.77	-3080.9	-3062.04
			100	95.2816	92.075	90.5837	87.3049	85.7076	82.7729	82.4228	78.9661	78.4826
8 min TTX	2018_02_05_0000		-2796.98	-2711.69	-2601.39	-2574.62	-2517.03	-2479.76	-2467.56	-2449.63	-2438.1	-2418.2
			100	96.9507	93.0072	92.05	89.9909	88.6583	88.2223	87.5813	87.1691	86.4573
[truncated: 36 more columns]

## Sheet: 3H
Measurements are % 1st pulse, 1st response after incubation at rest from data in 3F
2 min no PTX	8 min no PTX	1 min PTX	2 min PTX	5 min PTX	8 min PTX	Bicuculline
87.2434	67.5943	72.0541	52.1983	49.0382	20.1908	6.67807
102.399	64.2125	74.8636	49.1446	31.9346	17.0595	6.32267
81.2919	102.257	74.5125	79.5993	35.974	35.3696	6.6441
89.7279	80.0527	93.9595	71.008	12.1484	38.9436	7.88456
83.812	62.3929	62.1805	28.273	29.8747	45.3907
121.541	47.7726				28.6686
	58.8472				39.8298
					42.488
					24.0487
					29.9799
					24.8039
						6.88235
Subtract Bicuculline floor
2 min no PTX	8 min no PTX	1 min PTX	2 min PTX	5 min PTX	8 min PTX
80.3611	60.7119	65.1718	45.316	42.1559	13.3085
95.5166	57.3302	67.9812	42.2623	25.0522	10.1772
74.4096	95.3742	67.6302	72.717	29.0916	28.4872
82.8456	73.1704	87.0772	64.1256	5.26604	32.0613
76.9297	55.5106	55.2982	21.3906	22.9924	38.5083
114.659	40.8902				21.7863
	51.9649				32.9475
					35.6057
					17.1664
					23.0976
					17.9216
87.4536	62.1361
Normalized to no drug ceiling
		1 min PTX	2 min PTX	5 min PTX	8 min PTX
		74.5216	51.8172	67.8445	21.4183
		77.7341	48.3254	40.3184	16.3789
		77.3326	83.1492	46.8192	45.8465
		99.5696	73.3254	8.47502	51.5985
		63.2315	24.4594	37.0033	61.9742
					35.0623
					53.0247
					57.3027
					27.627
					37.1725
					28.8425
