# Supplementary material for: Spontaneous and evoked neurotransmission are partially segregated at inhibitory synapses
Source: eLife. 2020 May 13;9:e52852. doi: 10.7554/eLife.52852 (PMC7250572; doi:10.7554/eLife.52852)
Supplement: Figure 4—source data 1. [file elife-52852-fig4-data1.xlsx]

## Sheet: 4C
Condition	Interstimulus Interval	2019_12_05_Exp0B			2019_12_05_Exp1A			2019_12_18_Exp0A			2019_12_18_Exp0B			2019_12_18_Exp1A			2019_12_18_Exp1B
0.5 mM Ca2+	20	0.660377	0.592593	0.690265	0.768421	0.511364	0.561798	0.892562	0.9	0.932039	0.408284	0.413613	0.570652	0.627737	0.832168	0.774194	0.827225	1.00676	1.05512
	30	0.692913	0.573643	0.511628	0.566667	0.42	0.629213	1.30435	1.03191	0.801887	1.08427	1.09211	1.11409	0.968504	0.947917	0.959016	0.708333	1.22222	0.811429
	50	0.6875	0.532258	0.593103	0.84	0.46875	0.555556	0.839623	0.869565	0.903509	0.517647	0.81761	0.651429	1	0.902655	0.891026	0.337838	0.869318	0.892045
	100	0.889831	0.806897	1.00862	0.621622	0.777778	0.737864	0.898734	0.639098	0.745763	0.776119	0.937984	0.705263	0.642202	0.919708	0.916667	0.725	0.732283	0.792857
	200	0.779412	0.777778	0.762963	0.835294	0.963415	0.845361	0.743802	0.833333	0.925532	0.966443	0.689441	0.688889	1.0315	0.815789	0.823077	0.825	0.52381	0.668449
	300	0.859259	0.6125	0.748092	0.839623	0.833333	0.897959	0.762376	0.688889	0.71028	0.92638	1.03425	0.75	1.0438	0.738636	0.784314	0.71345	0.763158	0.702857
	400	0.679389	1.07563	0.873016	1.0119	0.877551	0.840426	0.819444	0.586538	1.03409	0.856209	0.762821	1.09701	1.09091	0.778571	0.979021	0.915584	0.629032	0.789474
	500	0.813433	0.930233	0.793548	0.805556	0.797872	0.556452	0.848214	0.848485	0.633929	0.815951	0.871212	0.830409	0.980198	1.01471	1.07463	0.910959	0.973333	0.827778
		2019_12_06_Exp0A			2020_02_03_Exp0A			2020_02_03_Exp0B			2020_02_03_Exp1A			2020_02_03_Exp1B
1.0 mM Ca2+	20	0.743119	0.673469	0.671111	0.678967	0.641667	0.746032	0.748815	0.538136	0.620253	0.426357	0.482759	0.518367	0.60515	0.609053	0.824121
	30	0.710037	0.777778	0.813953	0.706349	0.693548	0.719101	0.718593	0.967568	0.669811	0.683333	0.467153	0.490119	0.633333	0.652361	0.550661
	50	0.829596	0.724771	0.945701	0.70155	0.698795	0.626866	0.801762	0.748815	0.748858	0.536496	0.589226	0.566434	0.696429	0.834783	0.685567
	100	0.810811	0.917073	0.595745	0.783883	0.754098	0.716364	0.733624	0.661972	0.775862	0.647059	0.625	0.644898	0.678049	0.631841	0.642202
	200	0.741135	0.675676	0.952381	0.789091	0.738462	0.794776	0.866667	0.833333	0.660156	0.6917	0.678967	0.728873	0.717949	0.643777	0.725225
	300	0.884259	1	0.668103	0.825455	0.79927	0.930502	0.984536	0.809524	0.870968	0.821818	0.700389	0.770161	0.761702	0.732673	0.777778
	400	0.75122	0.944444	0.893855	0.830709	0.89781	0.942085	0.860656	0.856522	0.822134	0.808271	0.805861	0.839721	0.859155	0.721154	0.773504
	500	0.830846	0.846154	0.91866	0.814815	0.924242	0.894958	0.84375	0.898551	0.925	0.821168	0.840426	0.921488	0.953191	0.895928	0.810924
		2019_12_17_Exp1A			2019_12_17_Exp1B			2020_01_16_Exp1A			2020_01_16_Exp1A			2020_01_22_Exp1A			2020_01_22_Exp1A
1.0 mM Ca2+	20	0.234286	0.202572	0.219941	0.600858	0.467249	0.265152	0.546713	0.434783	0.430464	0.295918	0.165605	0.202899	0.174359	0.328125	0.186813	0.327974	0.23741	0.29316
	30	0.457338	0.533101	0.411565	0.600877	0.509346	0.36	0.621053	0.639216	0.56229	0.366548	0.392727	0.378947	0.342857	0.281081	0.406977	0.383764	0.327068	0.323843
	50	0.495979	0.490323	0.493789	0.597656	0.497674	0.5	0.496377	0.573826	0.629496	0.44863	0.441781	0.467577	0.47907	0.38674	0.445026	0.366337	0.368421	0.355172
	100	0.696751	0.714777	0.791367	0.61991	0.631579	0.565022	0.717472	0.667883	0.704467	0.688976	0.635628	0.624183	0.514423	0.52459	0.560606	0.475083	0.426923	0.505119
	200	0.774011	0.760383	0.755853	0.754167	0.776316	0.766055	0.735507	0.755245	0.798535	0.788927	0.756757	0.662252	0.691489	0.653061	0.613095	0.524648	0.519031	0.586081
	300	0.820669	0.825545	0.897516	0.776371	0.864979	0.770161	0.754386	0.807273	0.744262	0.821429	0.720848	0.722408	0.613953	0.553846	0.621891	0.626761	0.551471	0.617241
	400	0.791139	0.818966	0.878205	0.715481	0.734615	0.753968	0.831034	0.798013	0.832117	0.727575	0.762058	0.80625	0.59375	0.673913	0.746114	0.61039	0.607143	0.660256
	500	0.870036	0.849123	0.685629	0.973568	0.830645	0.818182	0.802326	0.835125	0.815331	0.812749	0.787375	0.892617	0.696035	0.771277	0.737113	0.674576	0.741573	0.761246
	Figure 4B shows average Paired Pulse traces at 100 ms interstimulus interval

## Sheet: 4D
Condition	File Name		0	10	20	30	40	50	60	70	80	90	100	110	120	130	140	150	160	170	180	190	200	210	220	230	240	250	260	270	280	290	300	310	320	330	340	350	360	370	380	390	400	410	420	430	440	450	460
0.5 mM Ca2+	2019_12_05_Exp0B	Raw Amplitude (pA)	0.188	0.151	0.164	0.134	0.175	0.171	0.173	0.163	0.185	0.176	0.161	0.151	0.159	0.17	0.147	0.147	0.15	0.147	0.156	0.161	0.163	0.169	0.139	0.21	0.175	0.16	0.187	0.164	0.143	0.179	0.151	0.161	0.161	0.178	0.163	0.177	0.154	0.181	0.136	0.159	0.171	0.165	0.152	0.155	0.172	0.154	0.166
		Normalized to Avg Baseline *100	115.535	92.7967	100.786	82.3494	107.546	105.088	106.317	100.171	113.691	108.16	98.9422	92.7967	97.7131	104.473	90.3385	90.3385	92.1821	90.3385	95.8694	98.9422	100.171	103.859	85.4221	129.055	107.546	98.3276	114.92	100.786	87.8803	110.004	92.7967	98.9422	98.9422	109.389	100.171	108.775	94.6403	111.233	83.5785	97.7131	105.088	101.4	93.4112	95.2549	105.702	94.6403	102.015
0.5 mM Ca2+	2019_12_05_Exp1A	Raw Amplitude (pA)	0.089	0.112	0.085	0.081	0.08	0.082	0.093	0.084	0.103	0.101	0.09	0.089	0.113	0.078	0.07	0.086	0.079	0.07	0.083	0.105	0.09	0.071	0.084	0.084	0.076	0.081	0.06	0.098	0.104	0.07	0.092	0.088	0.092	0.091	0.081	0.091	0.113	0.084	0.073	0.087	0.088	0.075	0.082	0.092	0.082	0.065	0.084
		Normalized to Avg Baseline *100	104.028	130.912	99.353	94.6775	93.5087	95.8464	108.704	98.1841	120.392	118.055	105.197	104.028	132.081	91.1709	81.8201	100.522	92.3398	81.8201	97.0152	122.73	105.197	82.9889	98.1841	98.1841	88.8332	94.6775	70.1315	114.548	121.561	81.8201	107.535	102.86	107.535	106.366	94.6775	106.366	132.081	98.1841	85.3267	101.691	102.86	87.6644	95.8464	107.535	95.8464	75.9758	98.1841
0.5 mM Ca2+	2019_12_18_Exp0A	Raw Amplitude (pA)	0.135	0.102	0.104	0.102	0.069	0.077	0.103	0.103	0.087	0.096	0.095	0.098	0.124	0.095	0.086	0.087	0.108	0.138	0.112	0.085	0.095	0.096	0.123	0.089	0.083	0.089	0.102	0.088	0.087	0.123	0.112	0.094	0.062	0.088	0.112	0.105	0.115	0.098	0.123	0.088	0.088	0.09	0.106	0.091	0.117	0.09	0.101
		Normalized to Avg Baseline *100	136.15	102.869	104.886	102.869	69.5879	77.6561	103.878	103.878	87.7413	96.8179	95.8094	98.835	125.057	95.8094	86.7327	87.7413	108.92	139.176	112.954	85.7242	95.8094	96.8179	124.048	89.7583	83.7072	89.7583	102.869	88.7498	87.7413	124.048	112.954	94.8009	62.5283	88.7498	112.954	105.895	115.98	98.835	124.048	88.7498	88.7498	90.7668	106.903	91.7753	117.997	90.7668	101.861
0.5 mM Ca2+	2019_12_18_Exp0B	Raw Amplitude (pA)	0.148	0.166	0.155	0.16	0.14	0.158	0.159	0.175	0.159	0.137	0.146	0.176	0.153	0.169	0.138	0.147	0.151	0.146	0.159	0.148	0.149	0.144	0.178	0.132	0.146	0.14	0.162	0.173	0.148	0.141	0.127	0.151	0.159	0.185	0.152	0.185	0.186	0.152	0.16	0.144	0.164	0.152	0.181	0.162	0.193	0.167	0.176
		Normalized to Avg Baseline *100	94.4127	105.895	98.8781	102.068	89.3093	100.792	101.43	111.637	101.43	87.3955	93.1368	112.275	97.6023	107.809	88.0334	93.7747	96.3264	93.1368	101.43	94.4127	95.0506	91.861	113.55	84.2059	93.1368	89.3093	103.344	110.361	94.4127	89.9472	81.0163	96.3264	101.43	118.016	96.9644	118.016	118.654	96.9644	102.068	91.861	104.619	96.9644	115.464	103.344	123.119	106.533	112.275
0.5 mM Ca2+	2019_12_18_Exp1A	Raw Amplitude (pA)	0.172	0.102	0.133	0.165	0.149	0.176	0.159	0.116	0.121	0.112	0.103	0.104	0.117	0.17	0.146	0.184	0.134	0.11	0.115	0.161	0.111	0.128	0.144	0.161	0.132	0.167	0.142	0.134	0.152	0.166	0.147	0.093	0.137	0.117	0.118	0.123	0.111	0.157	0.146	0.117	0.167	0.131	0.14	0.14	0.108	0.135	0.17
		Normalized to Avg Baseline *100	122.556	72.6784	94.767	117.568	106.168	125.406	113.293	82.6539	86.2166	79.8038	73.391	74.1035	83.3664	121.131	104.03	131.106	95.4795	78.3787	81.9414	114.718	79.0912	91.2043	102.605	114.718	94.0544	118.993	101.18	95.4795	108.305	118.281	104.742	66.2656	97.6171	83.3664	84.079	87.6416	79.0912	111.868	104.03	83.3664	118.993	93.3419	99.7547	99.7547	76.9536	96.192	121.131
0.5 mM Ca2+	2019_12_18_Exp1B	Raw Amplitude (pA)	0.156	0.136	0.185	0.173	0.184	0.177	0.136	0.098	0.124	0.159	0.126	0.131	0.12	0.178	0.175	0.2	0.144	0.15	0.148	0.207	0.131	0.179	0.199	0.143	0.126	0.175	0.155	0.14	0.176	0.165	0.121	0.138	0.142	0.135	0.116	0.144	0.14	0.177	0.148	0.144	0.155	0.162	0.173	0.142	0.138	0.172	0.148
		Normalized to Avg Baseline *100	103.638	90.3507	122.904	114.931	122.239	117.589	90.3507	65.1056	82.3786	105.631	83.7073	87.029	79.7212	118.253	116.26	132.869	95.6654	99.6515	98.3228	137.519	87.029	118.917	132.204	95.0011	83.7073	116.26	102.973	93.0081	116.924	109.617	80.3855	91.6794	94.3367	89.6863	77.0638	95.6654	93.0081	117.589	98.3228	95.6654	102.973	107.624	114.931	94.3367	91.6794	114.267	98.3228
1.0 mM Ca2+	2019_12_06_Exp0A	Raw Amplitude (pA)	0.284	0.233	0.24	0.246	0.284	0.266	0.254	0.234	0.267	0.26	0.251	0.269	0.259	0.217	0.235	0.256	0.255	0.265	0.239	0.257	0.243	0.238	0.275	0.248	0.241	0.246	0.289	0.28	0.26	0.279	0.259	0.259	0.272	0.257	0.227	0.234	0.242	0.234	0.265	0.281	0.218	0.25	0.233	0.247	0.275	0.271	0.281
		Normalized to Avg Baseline *100	110.945	91.0215	93.756	96.0999	110.945	103.913	99.2251	91.4121	104.304	101.569	98.0532	105.085	101.178	84.7711	91.8028	100.006	99.6158	103.522	93.3654	100.397	94.928	92.9747	107.429	96.8812	94.1467	96.0999	112.898	109.382	101.569	108.991	101.178	101.178	106.257	100.397	88.6776	91.4121	94.5373	91.4121	103.522	109.773	85.1617	97.6625	91.0215	96.4906	107.429	105.866	109.773
1.0 mM Ca2+	2020_02_03_Exp0A	Raw Amplitude (pA)	0.239	0.241	0.272	0.244	0.261	0.283	0.281	0.268	0.254	0.271	0.259	0.247	0.234	0.274	0.296	0.24	0.253	0.275	0.29	0.263	0.244	0.236	0.234	0.251	0.252	0.267	0.269	0.285	0.283	0.269	0.258	0.25	0.301	0.266	0.258	0.257	0.278	0.257	0.278	0.263	0.279	0.282	0.26	0.282	0.263	0.28	0.282
		Normalized to Avg Baseline *100	90.2795	91.035	102.745	92.1682	98.5898	106.9	106.145	101.234	95.9456	102.367	97.8343	93.3014	88.3908	103.5	111.811	90.6573	95.5679	103.878	109.544	99.3453	92.1682	89.1463	88.3908	94.8124	95.1901	100.856	101.612	107.656	106.9	101.612	97.4566	94.4347	113.699	100.478	97.4566	97.0788	105.011	97.0788	105.011	99.3453	105.389	106.522	98.212	106.522	99.3453	105.767	106.522
1.0 mM Ca2+	2020_02_03_Exp0B	Raw Amplitude (pA)	0.22	0.222	0.23	0.227	0.255	0.249	0.251	0.234	0.258	0.257	0.23	0.224	0.236	0.264	0.249	0.213	0.233	0.26	0.242	0.216	0.22	0.241	0.218	0.227	0.252	0.237	0.264	0.259	0.242	0.212	0.244	0.226	0.262	0.21	0.226	0.251	0.242	0.242	0.244	0.251	0.256	0.255	0.224	0.204	0.233	0.247	0.263
		Normalized to Avg Baseline *100	91.8069	92.6415	95.98	94.7281	106.413	103.909	104.743	97.6492	107.664	107.247	95.98	93.4761	98.4838	110.168	103.909	88.8858	97.2319	108.499	100.988	90.1377	91.8069	100.57	90.9723	94.7281	105.161	98.9011	110.168	108.082	100.988	88.4685	101.822	94.3108	109.334	87.6339	94.3108	104.743	100.988	100.988	101.822	104.743	106.83	106.413	93.4761	85.1301	97.2319	103.074	109.751
1.0 mM Ca2+	2020_02_03_Exp1A	Raw Amplitude (pA)	0.252	0.281	0.292	0.277	0.274	0.306	0.307	0.308	0.279	0.285	0.312	0.291	0.264	0.295	0.294	0.273	0.265	0.298	0.317	0.292	0.276	0.299	0.307	0.306	0.304	0.316	0.285	0.314	0.306	0.297	0.312	0.316	0.325	0.323	0.286	0.295	0.281	0.259	0.267	0.32	0.312	0.342	0.321	0.308	0.307	0.286	0.279
		Normalized to Avg Baseline *100	84.8527	94.6175	98.3214	93.2707	92.2605	103.035	103.372	103.709	93.9441	95.9644	105.056	97.9847	88.8934	99.3316	98.9949	91.9238	89.2301	100.342	106.739	98.3214	92.934	100.678	103.372	103.035	102.362	106.403	95.9644	105.729	103.035	100.005	105.056	106.403	109.433	108.76	96.3011	99.3316	94.6175	87.2098	89.9035	107.75	105.056	115.157	108.086	103.709	103.372	96.3011	93.9441
1.0 mM Ca2+	2020_02_03_Exp1B	Raw Amplitude (pA)	0.247	0.247	0.25	0.251	0.241	0.268	0.245	0.225	0.229	0.242	0.253	0.251	0.216	0.234	0.207	0.212	0.221	0.271	0.227	0.219	0.252	0.238	0.237	0.271	0.246	0.231	0.221	0.214	0.218	0.214	0.219	0.25	0.216	0.222	0.241	0.225	0.211	0.206	0.221	0.252	0.255	0.247	0.257	0.246	0.217	0.215	0.215
		Normalized to Avg Baseline *100	106.754	106.754	108.051	108.483	104.161	115.83	105.89	97.2455	98.9743	104.593	109.347	108.483	93.3557	101.135	89.4659	91.6269	95.5167	117.127	98.1099	94.6523	108.915	102.864	102.432	117.127	106.322	99.8387	95.5167	92.4913	94.2201	92.4913	94.6523	108.051	93.3557	95.9489	104.161	97.2455	91.1947	89.0337	95.5167	108.915	110.212	106.754	111.076	106.322	93.7879	92.9235	92.9235
2.0 mM Ca2+	2019_12_17_Exp1A	Raw Amplitude (pA)	0.342	0.328	0.334	0.309	0.375	0.334	0.339	0.363	0.349	0.352	0.366	0.359	0.349	0.356	0.365	0.328	0.36	0.35	0.372	0.346	0.336	0.33	0.368	0.37	0.373	0.367	0.389	0.371	0.374	0.372	0.369	0.343	0.342	0.363	0.359	0.354	0.38	0.368	0.356	0.329	0.362	0.359	0.343	0.337	0.381	0.357	0.332
		Normalized to Avg Baseline *100	96.4137	92.467	94.1584	87.1106	105.717	94.1584	95.568	102.334	98.3871	99.2328	103.18	101.206	98.3871	100.36	102.898	92.467	101.488	98.669	104.871	97.5414	94.7222	93.0308	103.743	104.307	105.153	103.462	109.664	104.589	105.435	104.871	104.025	96.6956	96.4137	102.334	101.206	99.7967	107.126	103.743	100.36	92.7489	102.052	101.206	96.6956	95.0042	107.408	100.642	93.5946
2.0 mM Ca2+	2019_12_17_Exp1B	Raw Amplitude (pA)	0.229	0.254	0.223	0.236	0.245	0.247	0.257	0.27	0.264	0.251	0.264	0.315	0.28	0.277	0.264	0.244	0.238	0.253	0.258	0.23	0.221	0.263	0.276	0.293	0.298	0.248	0.323	0.266	0.28	0.32	0.305	0.237	0.283	0.265	0.268	0.269	0.276	0.286	0.247	0.257	0.294	0.251	0.282	0.292	0.273	0.268	0.259
		Normalized to Avg Baseline *100	86.138	95.5417	83.8811	88.771	92.1564	92.9087	96.6702	101.56	99.3032	94.4133	99.3032	118.487	105.322	104.193	99.3032	91.7802	89.5233	95.1656	97.0463	86.5142	83.1288	98.9271	103.817	110.212	112.092	93.2848	121.496	100.055	105.322	120.368	114.725	89.1472	106.45	99.6793	100.808	101.184	103.817	107.578	92.9087	96.6702	110.588	94.4133	106.074	109.835	102.689	100.808	97.4225
2.0 mM Ca2+	2020_01_16_Exp1A	Raw Amplitude (pA)	0.35	0.35	0.34	0.33	0.356	0.349	0.361	0.371	0.347	0.33	0.321	0.335	0.356	0.37	0.356	0.347	0.348	0.34	0.358	0.343	0.335	0.33	0.341	0.355	0.341	0.357	0.365	0.371	0.373	0.371	0.35	0.369	0.357	0.394	0.353	0.339	0.378	0.348	0.34	0.374	0.37	0.375	0.378	0.359	0.363	0.375	0.376
		Normalized to Avg Baseline *100	97.6362	97.6362	94.8466	92.057	99.3099	97.3572	100.705	103.494	96.7993	92.057	89.5463	93.4518	99.3099	103.215	99.3099	96.7993	97.0783	94.8466	99.8679	95.6835	93.4518	92.057	95.1255	99.031	95.1255	99.5889	101.821	103.494	104.052	103.494	97.6362	102.936	99.5889	109.91	98.4731	94.5676	105.447	97.0783	94.8466	104.331	103.215	104.61	105.447	100.147	101.263	104.61	104.889
2.0 mM Ca2+	2020_01_16_Exp1B	Raw Amplitude (pA)	0.306	0.316	0.325	0.335	0.318	0.342	0.328	0.347	0.318	0.327	0.309	0.325	0.342	0.334	0.335	0.329	0.332	0.323	0.311	0.316	0.312	0.317	0.307	0.313	0.326	0.34	0.347	0.353	0.336	0.308	0.321	0.326	0.345	0.321	0.315	0.305	0.309	0.308	0.317	0.316	0.346	0.323	0.345	0.325	0.335	0.327	0.323
		Normalized to Avg Baseline *100	93.3676	96.4188	99.1649	102.216	97.0291	104.352	100.08	105.878	97.0291	99.7752	94.283	99.1649	104.352	101.911	102.216	100.385	101.301	98.5547	94.8932	96.4188	95.1983	96.7239	93.6727	95.5035	99.47	103.742	105.878	107.708	102.521	93.9778	97.9444	99.47	105.267	97.9444	96.1137	93.0625	94.283	93.9778	96.7239	96.4188	105.573	98.5547	105.267	99.1649	102.216	99.7752	98.5547
2.0 mM Ca2+	2020_01_22_Exp1A	Raw Amplitude (pA)	0.2	0.213	0.164	0.166	0.165	0.184	0.188	0.189	0.162	0.171	0.17	0.172	0.168	0.178	0.176	0.181	0.182	0.187	0.18	0.182	0.192	0.187	0.185	0.177	0.184	0.182	0.181	0.186	0.18	0.169	0.181	0.16	0.185	0.175	0.159	0.159	0.154	0.156	0.173	0.153	0.16	0.167	0.153	0.168	0.175	0.181	0.172
		Normalized to Avg Baseline *100	114.123	121.541	93.5806	94.7218	94.1512	104.993	107.275	107.846	92.4394	97.5749	97.0043	98.1455	95.8631	101.569	100.428	103.281	103.852	106.705	102.71	103.852	109.558	106.705	105.563	100.999	104.993	103.852	103.281	106.134	102.71	96.4337	103.281	91.2981	105.563	99.8573	90.7275	90.7275	87.8745	89.0157	98.7161	87.3039	91.2981	95.2924	87.3039	95.8631	99.8573	103.281	98.1455
2.0 mM Ca2+	2020_01_22_Exp1B	Raw Amplitude (pA)	0.313	0.309	0.309	0.269	0.288	0.309	0.311	0.306	0.302	0.311	0.291	0.281	0.275	0.258	0.293	0.286	0.293	0.293	0.315	0.298	0.298	0.292	0.313	0.3	0.318	0.311	0.316	0.308	0.314	0.309	0.296	0.279	0.297	0.309	0.285	0.287	0.264	0.289	0.282	0.297	0.303	0.316	0.272	0.285	0.293	0.294	0.295
		Normalized to Avg Baseline *100	105.916	104.562	104.562	91.0266	97.456	104.562	105.239	103.547	102.193	105.239	98.4712	95.0873	93.057	87.3044	99.148	96.7793	99.148	99.148	106.593	100.84	100.84	98.8096	105.916	101.517	107.608	105.239	106.931	104.224	106.254	104.562	100.163	94.4105	100.502	104.562	96.4409	97.1177	89.3347	97.7944	95.4257	100.502	102.532	106.931	92.0418	96.4409	99.148	99.4864	99.8248
[truncated: 20 more columns]

## Sheet: 4E
Condition	File Name		0	10	20	30	40	50	60	70	80	90	100	110	120	130	140	150	160	170	180	190	200	210	220	230	240	250	260	270	280	290	300	310	320	330	340	350	360	370	380	390	400	410	420	430	440	450	460
0.5 mM Ca2+	2019_12_05_Exp0B	Raw Amplitude (pA)	0.167	0.156	0.187	0.187	0.126	0.141	0.144	0.146	0.187	0.168	0.157	0.149	0.201	0.192	0.184	0.129	0.16	0.167	0.161	0.164	0.181	0.182	0.205	0.174	0.153	0.156	0.178	0.143	0.188	0.115	0.132	0.17	0.167	0.174	0.121	0.144	0.156	0.161	0.158	0.156	0.138	0.129	0.14	0.16	0.163	0.156	0.184
		Normalized to Avg Baseline *100	102.629	95.8694	114.92	114.92	77.433	86.6512	88.4949	89.724	114.92	103.244	96.484	91.5676	123.524	117.993	113.077	79.2766	98.3276	102.629	98.9422	100.786	111.233	111.848	125.982	106.931	94.0258	95.8694	109.389	87.8803	115.535	70.673	81.1203	104.473	102.629	106.931	74.3603	88.4949	95.8694	98.9422	97.0985	95.8694	84.8076	79.2766	86.0367	98.3276	100.171	95.8694	113.077
0.5 mM Ca2+	2019_12_05_Exp1A	Raw Amplitude (pA)	0.095	0.08	0.089	0.079	0.064	0.07	0.095	0.086	0.067	0.06	0.098	0.11	0.046	0.053	0.081	0.079	0.099	0.08	0.051	0.082	0.09	0.098	0.103	0.075	0.076	0.087	0.09	0.095	0.081	0.082	0.063	0.062	0.071	0.076	0.091	0.114	0.093	0.105	0.091	0.091	0.092	0.115	0.092	0.079	0.072	0.075	0.081
		Normalized to Avg Baseline *100	111.042	93.5087	104.028	92.3398	74.8069	81.8201	111.042	100.522	78.3135	70.1315	114.548	128.574	53.7675	61.9495	94.6775	92.3398	115.717	93.5087	59.6118	95.8464	105.197	114.548	120.392	87.6644	88.8332	101.691	105.197	111.042	94.6775	95.8464	73.6381	72.4692	82.9889	88.8332	106.366	133.25	108.704	122.73	106.366	106.366	107.535	134.419	107.535	92.3398	84.1578	87.6644	94.6775
0.5 mM Ca2+	2019_12_18_Exp0A	Raw Amplitude (pA)	0.063	0.127	0.145	0.115	0.074	0.119	0.158	0.136	0.12	0.064	0.116	0.137	0.087	0.111	0.053	0.106	0.125	0.119	0.128	0.056	0.097	0.117	0.046	0.063	0.076	0.125	0.072	0.054	0.108	0.134	0.102	0.113	0.08	0.058	0.057	0.022	0.048	0.066	0.096	0.114	0.107	0.063	0.106	0.089	0.094	0.076	0.102
		Normalized to Avg Baseline *100	63.5368	128.082	146.235	115.98	74.6305	120.014	159.346	137.159	121.022	64.5453	116.988	138.167	87.7413	111.946	53.4516	106.903	126.065	120.014	129.091	56.4771	97.8265	117.997	46.3919	63.5368	76.6475	126.065	72.6135	54.4601	108.92	135.142	102.869	113.963	80.6816	58.4942	57.4857	22.1874	48.409	66.5623	96.8179	114.971	107.912	63.5368	106.903	89.7583	94.8009	76.6475	102.869
0.5 mM Ca2+	2019_12_18_Exp0B	Raw Amplitude (pA)	0.145	0.17	0.163	0.149	0.135	0.159	0.168	0.172	0.102	0.163	0.191	0.164	0.151	0.137	0.128	0.162	0.197	0.184	0.102	0.144	0.161	0.165	0.158	0.114	0.165	0.165	0.138	0.137	0.156	0.118	0.2	0.183	0.106	0.124	0.122	0.11	0.102	0.144	0.152	0.163	0.153	0.145	0.188	0.174	0.128	0.158	0.169
		Normalized to Avg Baseline *100	92.4989	108.447	103.982	95.0506	86.1197	101.43	107.171	109.723	65.0682	103.982	121.843	104.619	96.3264	87.3955	81.6542	103.344	125.671	117.378	65.0682	91.861	102.706	105.257	100.792	72.7233	105.257	105.257	88.0334	87.3955	99.5161	75.275	127.585	116.74	67.6199	79.1025	77.8267	70.1716	65.0682	91.861	96.9644	103.982	97.6023	92.4989	119.93	110.999	81.6542	100.792	107.809
0.5 mM Ca2+	2019_12_18_Exp1A	Raw Amplitude (pA)	0.184	0.144	0.134	0.173	0.16	0.17	0.153	0.136	0.149	0.136	0.163	0.166	0.158	0.138	0.156	0.168	0.146	0.141	0.148	0.149	0.135	0.142	0.118	0.167	0.162	0.15	0.182	0.125	0.135	0.145	0.169	0.157	0.133	0.138	0.157	0.1	0.065	0.13	0.13	0.156	0.137	0.179	0.114	0.13	0.133	0.13	0.119
		Normalized to Avg Baseline *100	131.106	102.605	95.4795	123.268	114.005	121.131	109.018	96.9046	106.168	96.9046	116.143	118.281	112.58	98.3296	111.155	119.706	104.03	100.467	105.455	106.168	96.192	101.18	84.079	118.993	115.43	106.88	129.681	89.0667	96.192	103.317	120.418	111.868	94.767	98.3296	111.868	71.2534	46.3147	92.6294	92.6294	111.155	97.6171	127.544	81.2288	92.6294	94.767	92.6294	84.7915
0.5 mM Ca2+	2019_12_18_Exp1B	Raw Amplitude (pA)	0.159	0.148	0.146	0.148	0.161	0.137	0.138	0.126	0.111	0.168	0.146	0.179	0.163	0.152	0.169	0.151	0.129	0.166	0.136	0.128	0.194	0.187	0.171	0.134	0.125	0.137	0.148	0.131	0.167	0.151	0.153	0.17	0.171	0.143	0.154	0.129	0.161	0.151	0.174	0.154	0.145	0.126	0.126	0.143	0.122	0.078	0.148
		Normalized to Avg Baseline *100	105.631	98.3228	96.9941	98.3228	106.959	91.015	91.6794	83.7073	73.7421	111.61	96.9941	118.917	108.288	100.98	112.274	100.316	85.7003	110.281	90.3507	85.0359	128.883	124.232	113.603	89.022	83.0429	91.015	98.3228	87.029	110.945	100.316	101.645	112.938	113.603	95.0011	102.309	85.7003	106.959	100.316	115.596	102.309	96.3298	83.7073	83.7073	95.0011	81.0499	51.8188	98.3228
1.0 mM Ca2+	2019_12_06_Exp0A	Raw Amplitude (pA)	0.252	0.237	0.29	0.251	0.227	0.291	0.249	0.232	0.238	0.287	0.318	0.31	0.267	0.264	0.271	0.242	0.204	0.254	0.286	0.253	0.246	0.264	0.237	0.255	0.237	0.232	0.253	0.255	0.18	0.236	0.213	0.24	0.2	0.179	0.191	0.203	0.226	0.213	0.255	0.225	0.257	0.228	0.213	0.208	0.205	0.194	0.224
		Normalized to Avg Baseline *100	98.4438	92.5841	113.289	98.0532	88.6776	113.679	97.2719	90.6308	92.9747	112.117	124.227	121.102	104.304	103.132	105.866	94.5373	79.6926	99.2251	111.726	98.8345	96.0999	103.132	92.5841	99.6158	92.5841	90.6308	98.8345	99.6158	70.317	92.1934	83.2085	93.756	78.13	69.9264	74.6142	79.302	88.2869	83.2085	99.6158	87.8963	100.397	89.0682	83.2085	81.2552	80.0833	75.7861	87.5056
1.0 mM Ca2+	2020_02_03_Exp0A	Raw Amplitude (pA)	0.238	0.292	0.238	0.277	0.295	0.267	0.291	0.285	0.27	0.244	0.29	0.273	0.294	0.285	0.265	0.242	0.251	0.269	0.285	0.241	0.229	0.25	0.263	0.258	0.234	0.193	0.205	0.204	0.249	0.258	0.211	0.214	0.213	0.225	0.185	0.191	0.202	0.214	0.175	0.213	0.187	0.167	0.19	0.203	0.172	0.194	0.184
		Normalized to Avg Baseline *100	89.9018	110.3	89.9018	104.634	111.433	100.856	109.922	107.656	101.989	92.1682	109.544	103.123	111.055	107.656	100.101	91.4127	94.8124	101.612	107.656	91.035	86.5021	94.4347	99.3453	97.4566	88.3908	72.9036	77.4364	77.0587	94.0569	97.4566	79.7028	80.8361	80.4583	84.9912	69.8816	72.1481	76.3032	80.8361	66.1043	80.4583	70.6371	63.0823	71.7703	76.6809	64.971	73.2813	69.5039
1.0 mM Ca2+	2020_02_03_Exp0B	Raw Amplitude (pA)	0.242	0.234	0.221	0.252	0.266	0.216	0.239	0.253	0.224	0.222	0.277	0.268	0.268	0.256	0.231	0.222	0.237	0.267	0.258	0.214	0.209	0.254	0.253	0.272	0.212	0.195	0.203	0.196	0.223	0.228	0.207	0.177	0.223	0.213	0.186	0.187	0.217	0.193	0.242	0.219	0.165	0.189	0.225	0.168	0.167	0.196	0.199
		Normalized to Avg Baseline *100	100.988	97.6492	92.2242	105.161	111.003	90.1377	99.7357	105.578	93.4761	92.6415	115.593	111.838	111.838	106.83	96.3973	92.6415	98.9011	111.42	107.664	89.3031	87.2166	105.995	105.578	113.507	88.4685	81.3743	84.7128	81.7916	93.0588	95.1454	86.382	73.8628	93.0588	88.8858	77.6186	78.0359	90.555	80.5397	100.988	91.3896	68.8552	78.8705	93.8934	70.1071	69.6898	81.7916	83.0435
1.0 mM Ca2+	2020_02_03_Exp1A	Raw Amplitude (pA)	0.345	0.329	0.329	0.32	0.317	0.336	0.307	0.285	0.289	0.279	0.299	0.322	0.322	0.324	0.294	0.299	0.35	0.311	0.31	0.309	0.308	0.267	0.268	0.304	0.264	0.237	0.27	0.262	0.272	0.25	0.232	0.21	0.228	0.212	0.225	0.216	0.206	0.207	0.176	0.156	0.15	0.148	0.139	0.154	0.124	0.15	0.152
		Normalized to Avg Baseline *100	116.167	110.78	110.78	107.75	106.739	113.137	103.372	95.9644	97.3113	93.9441	100.678	108.423	108.423	109.096	98.9949	100.678	117.851	104.719	104.382	104.046	103.709	89.9035	90.2402	102.362	88.8934	79.802	90.9137	88.2199	91.5871	84.1793	78.1184	70.7106	76.7715	71.3841	75.7614	72.7309	69.3638	69.7005	59.2622	52.5279	50.5076	49.8342	46.8037	51.8545	41.7529	50.5076	51.181
1.0 mM Ca2+	2020_02_03_Exp1B	Raw Amplitude (pA)	0.263	0.246	0.235	0.22	0.245	0.266	0.237	0.218	0.247	0.226	0.23	0.233	0.236	0.237	0.226	0.287	0.279	0.222	0.236	0.276	0.231	0.234	0.248	0.263	0.215	0.242	0.224	0.247	0.224	0.229	0.172	0.19	0.193	0.214	0.179	0.198	0.187	0.175	0.195	0.153	0.139	0.151	0.154	0.181	0.164	0.181	0.184
		Normalized to Avg Baseline *100	113.669	106.322	101.568	95.0845	105.89	114.966	102.432	94.2201	106.754	97.6777	99.4065	100.703	102	102.432	97.6777	124.042	120.584	95.9489	102	119.288	99.8387	101.135	107.186	113.669	92.9235	104.593	96.8133	106.754	96.8133	98.9743	74.3388	82.1184	83.415	92.4913	77.3642	85.5761	80.8218	75.6354	84.2794	66.127	60.0761	65.2625	66.5592	78.2286	70.8812	78.2286	79.5252
2.0 mM Ca2+	2019_12_17_Exp1A	Raw Amplitude (pA)	0.382	0.405	0.393	0.37	0.388	0.375	0.336	0.364	0.325	0.359	0.373	0.383	0.336	0.318	0.32	0.308	0.321	0.321	0.293	0.296	0.273	0.268	0.278	0.269	0.235	0.222	0.219	0.214	0.208	0.166	0.171	0.164	0.157	0.132	0.146	0.173	0.184	0.107	0.119	0.094	0.095	0.131	0.143	0.099	0.086	0.091	0.12
		Normalized to Avg Baseline *100	107.69	114.174	110.791	104.307	109.382	105.717	94.7222	102.616	91.6212	101.206	105.153	107.972	94.7222	89.6478	90.2117	86.8287	90.4936	90.4936	82.6001	83.4458	76.9618	75.5523	78.3714	75.8342	66.2492	62.5843	61.7386	60.3291	58.6376	46.7973	48.2069	46.2335	44.2601	37.2123	41.1591	48.7707	51.8717	30.1645	33.5475	26.4997	26.7816	36.9304	40.3133	27.9092	24.2444	25.6539	33.8294
2.0 mM Ca2+	2019_12_17_Exp1B	Raw Amplitude (pA)	0.294	0.297	0.276	0.267	0.263	0.25	0.242	0.249	0.239	0.266	0.241	0.224	0.22	0.232	0.216	0.227	0.204	0.206	0.189	0.184	0.168	0.186	0.21	0.172	0.149	0.139	0.134	0.148	0.124	0.106	0.095	0.119	0.097	0.114	0.13	0.125	0.094	0.088	0.072	0.128	0.073	0.087	0.082	0.092	0.087	0.069	0.101
		Normalized to Avg Baseline *100	110.588	111.716	103.817	100.432	98.9271	94.0371	91.0279	93.661	89.8995	100.055	90.6518	84.2573	82.7527	87.2664	81.2481	85.3857	76.7343	77.4866	71.0921	69.2113	63.1929	69.9636	78.9912	64.6975	56.0461	52.2846	50.4039	55.67	46.6424	39.8717	35.7341	44.7617	36.4864	42.8809	48.8993	47.0186	35.358	33.1011	27.0827	48.147	27.4588	32.7249	30.8442	34.6057	32.7249	25.9542	37.991
2.0 mM Ca2+	2020_01_16_Exp1A	Raw Amplitude (pA)	0.376	0.381	0.419	0.393	0.398	0.37	0.371	0.388	0.398	0.421	0.415	0.407	0.417	0.401	0.395	0.4	0.4	0.37	0.358	0.342	0.318	0.323	0.369	0.32	0.315	0.308	0.297	0.267	0.274	0.252	0.242	0.23	0.225	0.232	0.258	0.246	0.246	0.238	0.233	0.221	0.209	0.23	0.214	0.194	0.187	0.196	0.214
		Normalized to Avg Baseline *100	104.889	106.284	116.884	109.631	111.026	103.215	103.494	108.237	111.026	117.442	115.769	113.537	116.327	111.863	110.189	111.584	111.584	103.215	99.8679	95.4045	88.7094	90.1042	102.936	89.2674	87.8726	85.9198	82.8513	74.4825	76.4352	70.298	67.5084	64.1609	62.7661	64.7188	71.9718	68.6243	68.6243	66.3926	64.9978	61.6503	58.3027	64.1609	59.6975	54.1183	52.1656	54.6763	59.6975
2.0 mM Ca2+	2020_01_16_Exp1B	Raw Amplitude (pA)	0.34	0.354	0.366	0.369	0.357	0.331	0.342	0.356	0.364	0.376	0.374	0.378	0.388	0.357	0.349	0.339	0.345	0.317	0.305	0.302	0.292	0.296	0.282	0.276	0.262	0.241	0.239	0.224	0.213	0.217	0.209	0.183	0.177	0.181	0.187	0.189	0.193	0.159	0.157	0.124	0.112	0.135	0.115	0.11	0.097	0.105	0.104
		Normalized to Avg Baseline *100	103.742	108.013	111.675	112.59	108.929	100.996	104.352	108.624	111.065	114.726	114.116	115.336	118.388	108.929	106.488	103.437	105.267	96.7239	93.0625	92.1471	89.0959	90.3164	86.0446	84.2139	79.9422	73.5346	72.9244	68.3475	64.9912	66.2117	63.7707	55.8375	54.0067	55.2272	57.058	57.6682	58.8887	48.5145	47.9043	37.8352	34.1738	41.1916	35.0891	33.5635	29.5969	32.0379	31.7328
2.0 mM Ca2+	2020_01_22_Exp1A	Raw Amplitude (pA)	0.165	0.169	0.172	0.189	0.179	0.184	0.202	0.186	0.194	0.178	0.179	0.172	0.17	0.167	0.193	0.19	0.17	0.151	0.158	0.167	0.164	0.169	0.157	0.145	0.139	0.147	0.131	0.124	0.127	0.116	0.107	0.101	0.093	0.09	0.083	0.092	0.086	0.074	0.083	0.06	0.047	0.045	0.041	0.041	0.027	0.041	0.042
		Normalized to Avg Baseline *100	94.1512	96.4337	98.1455	107.846	102.14	104.993	115.264	106.134	110.699	101.569	102.14	98.1455	97.0043	95.2924	110.128	108.417	97.0043	86.1626	90.1569	95.2924	93.5806	96.4337	89.5863	82.7389	79.3153	83.8802	74.7504	70.7561	72.4679	66.1912	61.0556	57.632	53.067	51.3552	47.3609	52.4964	49.0728	42.2254	47.3609	34.2368	26.8188	25.6776	23.3951	23.3951	15.4066	23.3951	23.9658
2.0 mM Ca2+	2020_01_22_Exp1B	Raw Amplitude (pA)	0.274	0.269	0.281	0.288	0.286	0.296	0.307	0.325	0.321	0.322	0.3	0.317	0.293	0.269	0.277	0.3	0.295	0.264	0.275	0.256	0.286	0.267	0.256	0.234	0.235	0.224	0.222	0.23	0.201	0.224	0.173	0.176	0.159	0.152	0.157	0.154	0.159	0.163	0.129	0.13	0.123	0.112	0.105	0.093	0.094	0.098	0.116
		Normalized to Avg Baseline *100	92.7186	91.0266	95.0873	97.456	96.7793	100.163	103.885	109.976	108.623	108.961	101.517	107.269	99.148	91.0266	93.7338	101.517	99.8248	89.3347	93.057	86.6276	96.7793	90.3499	86.6276	79.183	79.5214	75.7991	75.1224	77.8295	68.0162	75.7991	58.5413	59.5565	53.8039	51.4351	53.1271	52.1119	53.8039	55.1574	43.6522	43.9906	41.6219	37.8996	35.5308	31.4702	31.8086	33.1621	39.2531
[truncated: 74 more columns]

## Sheet: 4G
Condition	File Name		0	10	20	30	40	50	60	70	80	90	100	110	120	130	140	150	160	170	180	190	200	210	220	230	240	250	260	270	280	290	300	310	320	330	340	350	360	370	380	390	400	410	420	430	440	450	460
0 minutes	2019_12_17_Exp1A	Raw Amplitude (pA)	0.342	0.328	0.334	0.309	0.375	0.334	0.339	0.363	0.349	0.352	0.366	0.359	0.349	0.356	0.365	0.328	0.36	0.35	0.372	0.346	0.336	0.33	0.368	0.37	0.373	0.367	0.389	0.371	0.374	0.372	0.369	0.343	0.342	0.363	0.359	0.354	0.38	0.368	0.356	0.329	0.362	0.359	0.343	0.337	0.381	0.357	0.332
		Normalized to Avg Baseline *100	96.4137	92.467	94.1584	87.1106	105.717	94.1584	95.568	102.334	98.3871	99.2328	103.18	101.206	98.3871	100.36	102.898	92.467	101.488	98.669	104.871	97.5414	94.7222	93.0308	103.743	104.307	105.153	103.462	109.664	104.589	105.435	104.871	104.025	96.6956	96.4137	102.334	101.206	99.7967	107.126	103.743	100.36	92.7489	102.052	101.206	96.6956	95.0042	107.408	100.642	93.5946
0 minutes	2019_12_17_Exp1B	Raw Amplitude (pA)	0.229	0.254	0.223	0.236	0.245	0.247	0.257	0.27	0.264	0.251	0.264	0.315	0.28	0.277	0.264	0.244	0.238	0.253	0.258	0.23	0.221	0.263	0.276	0.293	0.298	0.248	0.323	0.266	0.28	0.32	0.305	0.237	0.283	0.265	0.268	0.269	0.276	0.286	0.247	0.257	0.294	0.251	0.282	0.292	0.273	0.268	0.259
		Normalized to Avg Baseline *100	86.138	95.5417	83.8811	88.771	92.1564	92.9087	96.6702	101.56	99.3032	94.4133	99.3032	118.487	105.322	104.193	99.3032	91.7802	89.5233	95.1656	97.0463	86.5142	83.1288	98.9271	103.817	110.212	112.092	93.2848	121.496	100.055	105.322	120.368	114.725	89.1472	106.45	99.6793	100.808	101.184	103.817	107.578	92.9087	96.6702	110.588	94.4133	106.074	109.835	102.689	100.808	97.4225
0 minutes	2020_01_16_Exp1A	Raw Amplitude (pA)	0.35	0.35	0.34	0.33	0.356	0.349	0.361	0.371	0.347	0.33	0.321	0.335	0.356	0.37	0.356	0.347	0.348	0.34	0.358	0.343	0.335	0.33	0.341	0.355	0.341	0.357	0.365	0.371	0.373	0.371	0.35	0.369	0.357	0.394	0.353	0.339	0.378	0.348	0.34	0.374	0.37	0.375	0.378	0.359	0.363	0.375	0.376
		Normalized to Avg Baseline *100	97.6362	97.6362	94.8466	92.057	99.3099	97.3572	100.705	103.494	96.7993	92.057	89.5463	93.4518	99.3099	103.215	99.3099	96.7993	97.0783	94.8466	99.8679	95.6835	93.4518	92.057	95.1255	99.031	95.1255	99.5889	101.821	103.494	104.052	103.494	97.6362	102.936	99.5889	109.91	98.4731	94.5676	105.447	97.0783	94.8466	104.331	103.215	104.61	105.447	100.147	101.263	104.61	104.889
0 minutes	2020_01_16_Exp1B	Raw Amplitude (pA)	0.306	0.316	0.325	0.335	0.318	0.342	0.328	0.347	0.318	0.327	0.309	0.325	0.342	0.334	0.335	0.329	0.332	0.323	0.311	0.316	0.312	0.317	0.307	0.313	0.326	0.34	0.347	0.353	0.336	0.308	0.321	0.326	0.345	0.321	0.315	0.305	0.309	0.308	0.317	0.316	0.346	0.323	0.345	0.325	0.335	0.327	0.323
		Normalized to Avg Baseline *100	93.3676	96.4188	99.1649	102.216	97.0291	104.352	100.08	105.878	97.0291	99.7752	94.283	99.1649	104.352	101.911	102.216	100.385	101.301	98.5547	94.8932	96.4188	95.1983	96.7239	93.6727	95.5035	99.47	103.742	105.878	107.708	102.521	93.9778	97.9444	99.47	105.267	97.9444	96.1137	93.0625	94.283	93.9778	96.7239	96.4188	105.573	98.5547	105.267	99.1649	102.216	99.7752	98.5547
0 minutes	2020_01_22_Exp1A	Raw Amplitude (pA)	0.2	0.213	0.164	0.166	0.165	0.184	0.188	0.189	0.162	0.171	0.17	0.172	0.168	0.178	0.176	0.181	0.182	0.187	0.18	0.182	0.192	0.187	0.185	0.177	0.184	0.182	0.181	0.186	0.18	0.169	0.181	0.16	0.185	0.175	0.159	0.159	0.154	0.156	0.173	0.153	0.16	0.167	0.153	0.168	0.175	0.181	0.172
		Normalized to Avg Baseline *100	114.123	121.541	93.5806	94.7218	94.1512	104.993	107.275	107.846	92.4394	97.5749	97.0043	98.1455	95.8631	101.569	100.428	103.281	103.852	106.705	102.71	103.852	109.558	106.705	105.563	100.999	104.993	103.852	103.281	106.134	102.71	96.4337	103.281	91.2981	105.563	99.8573	90.7275	90.7275	87.8745	89.0157	98.7161	87.3039	91.2981	95.2924	87.3039	95.8631	99.8573	103.281	98.1455
0 minutes	2020_01_22_Exp1B	Raw Amplitude (pA)	0.313	0.309	0.309	0.269	0.288	0.309	0.311	0.306	0.302	0.311	0.291	0.281	0.275	0.258	0.293	0.286	0.293	0.293	0.315	0.298	0.298	0.292	0.313	0.3	0.318	0.311	0.316	0.308	0.314	0.309	0.296	0.279	0.297	0.309	0.285	0.287	0.264	0.289	0.282	0.297	0.303	0.316	0.272	0.285	0.293	0.294	0.295
		Normalized to Avg Baseline *100	105.916	104.562	104.562	91.0266	97.456	104.562	105.239	103.547	102.193	105.239	98.4712	95.0873	93.057	87.3044	99.148	96.7793	99.148	99.148	106.593	100.84	100.84	98.8096	105.916	101.517	107.608	105.239	106.931	104.224	106.254	104.562	100.163	94.4105	100.502	104.562	96.4409	97.1177	89.3347	97.7944	95.4257	100.502	102.532	106.931	92.0418	96.4409	99.148	99.4864	99.8248
5 minutes	2019_12_13_Exp1A	Raw Amplitude (pA)	0.24	0.247	0.226	0.231	0.222	0.217	0.253	0.247	0.217	0.215	0.211	0.202	0.23	0.219	0.277	0.247	0.245	0.209	0.226	0.23	0.247	0.238	0.227	0.237	0.227	0.218	0.214	0.236	0.245	0.255	0.248	0.255	0.239	0.253	0.227	0.242	0.239	0.225	0.234	0.239	0.222	0.231	0.258	0.233	0.246	0.229	0.249
		Normalized to Avg Baseline *100	101.638	104.603	95.7095	97.827	94.0156	91.8981	107.144	104.603	91.8981	91.0511	89.3571	85.5457	97.4035	92.7451	117.308	104.603	103.756	88.5101	95.7095	97.4035	104.603	100.791	96.133	100.368	96.133	92.3216	90.6276	99.9445	103.756	107.991	105.026	107.991	101.215	107.144	96.133	102.485	101.215	95.286	99.0975	101.215	94.0156	97.827	109.261	98.674	104.179	96.98	105.45
5 minutes	2019_12_16_Exp1A	Raw Amplitude (pA)	0.238	0.241	0.219	0.229	0.215	0.236	0.224	0.206	0.235	0.217	0.249	0.224	0.215	0.199	0.208	0.208	0.209	0.192	0.204	0.206	0.198	0.201	0.204	0.196	0.203	0.233	0.197	0.221	0.19	0.198	0.197	0.212	0.226	0.223	0.213	0.177	0.183	0.226	0.212	0.187	0.184	0.186	0.215	0.208	0.228	0.172	0.205
		Normalized to Avg Baseline *100	114.758	116.204	105.596	110.418	103.668	113.793	108.007	99.3281	113.311	104.632	120.062	108.007	103.668	95.9529	100.292	100.292	100.775	92.5777	98.3638	99.3281	95.4707	96.9172	98.3638	94.5064	97.8816	112.347	94.9885	106.561	91.6133	95.4707	94.9885	102.221	108.972	107.525	102.703	85.345	88.2381	108.972	102.221	90.1668	88.7203	89.6846	103.668	100.292	109.936	82.9342	98.8459
5 minutes	2019_12_16_Exp1B	Raw Amplitude (pA)	0.359	0.346	0.331	0.316	0.323	0.318	0.32	0.311	0.33	0.326	0.321	0.311	0.321	0.324	0.313	0.333	0.365	0.314	0.316	0.328	0.314	0.334	0.334	0.323	0.315	0.327	0.314	0.31	0.344	0.319	0.329	0.337	0.319	0.326	0.314	0.298	0.336	0.322	0.298	0.313	0.302	0.337	0.354	0.344	0.312	0.315	0.347
		Normalized to Avg Baseline *100	110.372	106.376	101.764	97.1524	99.3045	97.7672	98.3821	95.6151	101.457	100.227	98.6896	95.6151	98.6896	99.6119	96.23	102.379	112.217	96.5375	97.1524	100.842	96.5375	102.686	102.686	99.3045	96.8449	100.534	96.5375	95.3077	105.761	98.0747	101.149	103.609	98.0747	100.227	96.5375	91.6184	103.301	98.997	91.6184	96.23	92.8481	103.609	108.835	105.761	95.9226	96.8449	106.683
5 minutes	2020_01_22_Exp0A	Raw Amplitude (pA)	0.319	0.353	0.34	0.345	0.354	0.324	0.358	0.337	0.344	0.361	0.367	0.361	0.364	0.361	0.363	0.352	0.363	0.361	0.367	0.347	0.368	0.352	0.357	0.354	0.36	0.353	0.361	0.35	0.352	0.351	0.36	0.361	0.366	0.362	0.363	0.356	0.362	0.37	0.382	0.384	0.367	0.365	0.38	0.375	0.383	0.372	0.384
		Normalized to Avg Baseline *100	88.167	97.5641	93.971	95.353	97.8404	89.5489	98.946	93.1419	95.0766	99.7751	101.433	99.7751	100.604	99.7751	100.328	97.2877	100.328	99.7751	101.433	95.9057	101.71	97.2877	98.6696	97.8404	99.4988	97.5641	99.7751	96.7349	97.2877	97.0113	99.4988	99.7751	101.157	100.052	100.328	98.3932	100.052	102.263	105.579	106.132	101.433	100.881	105.026	103.645	105.856	102.815	106.132
5 minutes	2020_01_22_Exp0B	Raw Amplitude (pA)	0.337	0.333	0.334	0.318	0.322	0.323	0.333	0.32	0.327	0.333	0.334	0.328	0.329	0.322	0.306	0.324	0.323	0.327	0.322	0.344	0.314	0.34	0.347	0.339	0.33	0.327	0.339	0.328	0.335	0.341	0.336	0.325	0.33	0.324	0.327	0.318	0.312	0.326	0.338	0.311	0.328	0.32	0.311	0.322	0.309	0.31	0.308
		Normalized to Avg Baseline *100	103.817	102.585	102.893	97.9637	99.1959	99.504	102.585	98.5798	100.736	102.585	102.893	101.044	101.352	99.1959	94.2669	99.812	99.504	100.736	99.1959	105.973	96.7314	104.741	106.897	104.433	101.66	100.736	104.433	101.044	103.201	105.049	103.509	100.12	101.66	99.812	100.736	97.9637	96.1153	100.428	104.125	95.8072	101.044	98.5798	95.8072	99.1959	95.1911	95.4992	94.883
5 minutes	2020_01_27_Exp0A	Raw Amplitude (pA)	0.358	0.365	0.316	0.328	0.356	0.343	0.36	0.382	0.366	0.375	0.376	0.36	0.36	0.355	0.356	0.339	0.328	0.342	0.37	0.381	0.366	0.376	0.362	0.374	0.357	0.378	0.364	0.349	0.34	0.344	0.379	0.39	0.344	0.365	0.349	0.37	0.391	0.37	0.356	0.358	0.373	0.375	0.391	0.373	0.375	0.365	0.354
		Normalized to Avg Baseline *100	98.9814	100.917	87.369	90.6868	98.4284	94.8341	99.5343	105.617	101.193	103.682	103.958	99.5343	99.5343	98.1519	98.4284	93.7282	90.6868	94.5576	102.299	105.341	101.193	103.958	100.087	103.405	98.7049	104.511	100.64	96.493	94.0047	95.1106	104.788	107.829	95.1106	100.917	96.493	102.299	108.105	102.299	98.4284	98.9814	103.129	103.682	108.105	103.129	103.682	100.917	97.8754
5 minutes	2020_01_27_Exp0B	Raw Amplitude (pA)	0.273	0.27	0.251	0.228	0.259	0.267	0.272	0.269	0.273	0.275	0.275	0.283	0.253	0.268	0.253	0.239	0.245	0.255	0.271	0.271	0.283	0.273	0.243	0.265	0.304	0.274	0.264	0.252	0.268	0.272	0.281	0.263	0.25	0.236	0.268	0.281	0.244	0.249	0.242	0.254	0.282	0.27	0.281	0.289	0.254	0.25	0.252
		Normalized to Avg Baseline *100	102.713	101.584	94.4356	85.7822	97.4455	100.455	102.337	101.208	102.713	103.465	103.465	106.475	95.1881	100.832	95.1881	89.9208	92.1782	95.9406	101.96	101.96	106.475	102.713	91.4257	99.703	114.376	103.089	99.3267	94.8119	100.832	102.337	105.723	98.9505	94.0594	88.7921	100.832	105.723	91.802	93.6832	91.0495	95.5644	106.099	101.584	105.723	108.733	95.5644	94.0594	94.8119
10 minutes	2019_12_16_Exp2A	Raw Amplitude (pA)	0.229	0.211	0.241	0.234	0.216	0.24	0.262	0.248	0.211	0.215	0.251	0.233	0.253	0.256	0.258	0.257	0.266	0.257	0.231	0.222	0.238	0.214	0.222	0.216	0.245	0.221	0.252	0.23	0.221	0.244	0.219	0.237	0.27	0.269	0.266	0.259	0.249	0.274	0.266	0.27	0.268	0.23	0.229	0.226	0.263	0.248	0.262
		Normalized to Avg Baseline *100	93.4944	86.1455	98.3937	95.5358	88.1869	97.9854	106.967	101.252	86.1455	87.7786	102.476	95.1275	103.293	104.518	105.334	104.926	108.6	104.926	94.311	90.6365	97.1689	87.3703	90.6365	88.1869	100.027	90.2282	102.885	93.9027	90.2282	99.6185	89.4117	96.7606	110.234	109.825	108.6	105.743	101.66	111.867	108.6	110.234	109.417	93.9027	93.4944	92.2696	107.376	101.252	106.967
10 minutes	2019_12_16_Exp2B	Raw Amplitude (pA)	0.271	0.245	0.265	0.279	0.251	0.26	0.274	0.255	0.25	0.246	0.248	0.303	0.26	0.276	0.283	0.274	0.266	0.247	0.238	0.281	0.277	0.249	0.225	0.244	0.236	0.246	0.287	0.274	0.238	0.24	0.242	0.27	0.257	0.276	0.266	0.261	0.275	0.283	0.28	0.269	0.261	0.24	0.257	0.244	0.265	0.276	0.262
		Normalized to Avg Baseline *100	103.119	93.2256	100.836	106.163	95.5087	98.9333	104.26	97.0308	95.1282	93.6061	94.3672	115.295	98.9333	105.022	107.685	104.26	101.216	93.9867	90.562	106.924	105.402	94.7477	85.6154	92.8451	89.801	93.6061	109.207	104.26	90.562	91.3231	92.0841	102.738	97.7918	105.022	101.216	99.3138	104.641	107.685	106.544	102.358	99.3138	91.3231	97.7918	92.8451	100.836	105.022	99.6943
10 minutes	2020_01_16_Exp0A	Raw Amplitude (pA)	0.268	0.274	0.303	0.308	0.286	0.278	0.271	0.264	0.259	0.263	0.271	0.291	0.279	0.256	0.291	0.289	0.288	0.276	0.259	0.288	0.299	0.284	0.294	0.301	0.279	0.291	0.293	0.301	0.279	0.29	0.31	0.282	0.275	0.299	0.274	0.273	0.282	0.29	0.289	0.277	0.269	0.28	0.275	0.299	0.283	0.274	0.291
		Normalized to Avg Baseline *100	94.6817	96.8015	107.047	108.813	101.041	98.2146	95.7416	93.2686	91.5021	92.9153	95.7416	102.807	98.5679	90.4422	102.807	102.101	101.748	97.508	91.5021	101.748	105.634	100.334	103.867	106.34	98.5679	102.807	103.514	106.34	98.5679	102.454	109.52	99.6278	97.1548	105.634	96.8015	96.4482	99.6278	102.454	102.101	97.8613	95.035	98.9212	97.1548	105.634	99.9811	96.8015	102.807
10 minutes	2020_01_16_Exp0B	Raw Amplitude (pA)	0.438	0.428	0.448	0.444	0.453	0.444	0.439	0.446	0.435	0.46	0.435	0.447	0.44	0.463	0.473	0.469	0.456	0.426	0.433	0.444	0.457	0.466	0.462	0.474	0.459	0.455	0.459	0.447	0.47	0.466	0.46	0.449	0.438	0.456	0.448	0.455	0.466	0.47	0.465	0.447	0.467	0.476	0.455	0.493	0.47	0.498	0.491
		Normalized to Avg Baseline *100	95.2433	93.0688	97.4178	96.548	98.505	96.548	95.4607	96.9829	94.5909	100.027	94.5909	97.2003	95.6782	100.68	102.854	101.984	99.1574	92.6339	94.156	96.548	99.3748	101.332	100.462	103.071	99.8097	98.9399	99.8097	97.2003	102.202	101.332	100.027	97.6352	95.2433	99.1574	97.4178	98.9399	101.332	102.202	101.114	97.2003	101.549	103.506	98.9399	107.203	102.202	108.29	106.768
10 minutes	2020_01_27_Exp1A	Raw Amplitude (pA)	0.402	0.414	0.447	0.441	0.413	0.41	0.434	0.435	0.438	0.408	0.424	0.437	0.437	0.436	0.432	0.414	0.403	0.417	0.453	0.433	0.446	0.436	0.436	0.441	0.398	0.412	0.419	0.398	0.417	0.416	0.424	0.429	0.424	0.411	0.395	0.413	0.422	0.437	0.428	0.457	0.44	0.451	0.429	0.459	0.478	0.417	0.437
		Normalized to Avg Baseline *100	93.8188	96.6193	104.321	102.921	96.3859	95.6858	101.287	101.52	102.22	95.219	98.9531	101.987	101.987	101.754	100.82	96.6193	94.0521	97.3195	105.721	101.054	104.087	101.754	101.754	102.921	92.8852	96.1526	97.7862	92.8852	97.3195	97.0861	98.9531	100.12	98.9531	95.9192	92.1851	96.3859	98.4864	101.987	99.8866	106.655	102.687	105.254	100.12	107.121	111.556	97.3195	101.987
10 minutes	2020_01_27_Exp1B	Raw Amplitude (pA)	0.258	0.252	0.262	0.238	0.259	0.272	0.256	0.268	0.238	0.259	0.25	0.278	0.312	0.306	0.256	0.237	0.273	0.265	0.299	0.256	0.292	0.265	0.226	0.238	0.24	0.235	0.266	0.227	0.251	0.233	0.25	0.228	0.245	0.228	0.236	0.231	0.283	0.284	0.249	0.268	0.27	0.274	0.294	0.274	0.25	0.242	0.273
		Normalized to Avg Baseline *100	99.6304	97.3134	101.175	91.9071	100.017	105.037	98.8581	103.492	91.9071	100.017	96.5411	107.354	120.483	118.166	98.8581	91.5209	105.423	102.334	115.463	98.8581	112.76	102.334	87.2731	91.9071	92.6794	90.7486	102.72	87.6593	96.9272	89.9763	96.5411	88.0455	94.6102	88.0455	91.1348	89.2039	109.284	109.671	96.1549	103.492	104.264	105.809	113.532	105.809	96.5411	93.4518	105.423
10 minutes	2020_01_28_Exp0A	Raw Amplitude (pA)	0.399	0.392	0.418	0.427	0.428	0.429	0.423	0.426	0.419	0.394	0.409	0.396	0.43	0.412	0.422	0.398	0.39	0.413	0.406	0.374	0.397	0.425	0.42	0.447	0.405	0.415	0.401	0.397	0.403	0.38	0.394	0.392	0.387	0.375	0.416	0.413	0.419	0.414	0.368	0.386	0.453	0.396	0.358	0.396	0.435	0.408	0.401
		Normalized to Avg Baseline *100	98.9943	97.2575	103.708	105.941	106.189	106.437	104.949	105.693	103.956	97.7538	101.475	98.25	106.686	102.22	104.701	98.7462	96.7613	102.468	100.731	92.7916	98.4981	105.445	104.205	110.903	100.483	102.964	99.4905	98.4981	99.9867	94.2803	97.7538	97.2575	96.017	93.0397	103.212	102.468	103.956	102.716	91.303	95.7689	112.392	98.25	88.8219	98.25	107.926	101.227	99.4905
10 minutes	2020_01_28_Exp0B	Raw Amplitude (pA)	0.3	0.344	0.326	0.35	0.354	0.354	0.358	0.381	0.314	0.322	0.312	0.339	0.339	0.348	0.339	0.336	0.355	0.386	0.352	0.333	0.372	0.368	0.36	0.364	0.386	0.373	0.362	0.368	0.348	0.335	0.336	0.336	0.33	0.402	0.365	0.363	0.342	0.35	0.35	0.414	0.355	0.35	0.364	0.389	0.366	0.365	0.356
		Normalized to Avg Baseline *100	84.2021	96.5517	91.4996	98.2358	99.3585	99.3585	100.481	106.937	88.1315	90.3769	87.5702	95.1484	95.1484	97.6744	95.1484	94.3063	99.6391	108.34	98.7971	93.4643	104.411	103.288	101.043	102.165	108.34	104.691	101.604	103.288	97.6744	94.0257	94.3063	94.3063	92.6223	112.831	102.446	101.885	95.9904	98.2358	98.2358	116.199	99.6391	98.2358	102.165	109.182	102.727	102.446	99.9198
	Figure 4H shows average baseline (black) trace and average first trace following PTX application (gray, red, blue)
[truncated: 253 more columns]

## Sheet: 4I
				First Stimluation After PTX	First Stimulation After PTX - Average of Last 50 stimluations	% Receptors Blocked	Average % Receptors Blocked	% Receptors Intact	Average % Intact	Standard Deviation	SEM
0 minutes	Average of first 50 stimulations from all recordings	99.8679		107.69	85.5454	-10.0643	-3.12461	110.064	103.125	9.36191	3.82198
	Average of last 50 stimulations from all recordings	22.1448		110.588	88.4429	-13.7923		113.792
	Overall Range (Avg last 50 - Avg first 50)	77.7231		104.889	82.7444	-6.46046		106.46
				103.742	81.597	-4.98421		104.984
				94.1512	72.0064	7.35518		92.6448
				92.7186	70.5738	9.19841		90.8016
5 minutes	Average of first 50 stimulations from all recordings	99.8813		92.3216	70.4389	9.69211	11.9942	90.3079	88.0058	12.9441	4.89242
	Average of last 50 stimulations from all recordings	21.8827		75.7015	53.8188	31.0003		68.9997
	Overall Range (Avg last 50 - Avg first 50)	77.9986		92.2333	70.3505	9.80534		90.1947
				79.0745	57.1918	26.6758		73.3242
				99.3267	77.444	0.710973		99.289
				91.2072	69.3245	11.1208		88.8792
				103.817	81.9341	-5.04567		105.046
10 minutes	Average of first 50 stimulations from all recordings	99.6461		59.1995	31.7379	56.0322	65.9544	43.9678	34.0456	15.1857	5.36896
	Average of last 50 stimulations from all recordings	27.4617		49.4667	22.005	69.5156		30.4844
	Overall Range (Avg last 50 - Avg first 50)	72.1844		49.8139	22.3522	69.0345		30.9655
				39.1411	11.6794	83.82		16.18
				46.4426	18.981	73.7049		26.2951
				47.112	19.6504	72.7775		27.2225
				49.6212	22.1595	69.3015		30.6985
				75.5012	48.0395	33.4488		66.5512
