# Supplementary material for: Spontaneous and evoked neurotransmission are partially segregated at inhibitory synapses
Source: eLife. 2020 May 13;9:e52852. doi: 10.7554/eLife.52852 (PMC7250572; doi:10.7554/eLife.52852)
Supplement: Figure 5—figure supplement 1—source data 1. [file elife-52852-fig5-figsupp1-data1.xlsx]

## Sheet: S5
Measurements are area (pA*ms) of individual evoked responses
Negative percentages recorded as 0% area			Time (s):
Condition:	File Name:		240	245	250	255	260	265	270	275	280	285	290	295	300	305	310	315	320	325	330	335	340	345	350	355	360	365	370	375	380	385	390	395	400	405	410	415	420	425	430	435	440	445	450	455	460	465	470
0.2 Hz stimulation	2019_03_06_0002	raw	-7998.54	-21964.5	-20692.2	-22779.6	-26250.9	-31084.6	-29555.7	-21085.3	-15471.6	-26736.6	-37628.4	-41729.2	-20541	-37402.3	-30906	-25871	-32697	-26650.3	-47829	-45801.9	-63114.9	-46473.7	-37614.7	-51800.4	-49998	-41758.9	-42295.4	-51410.5	-52534.9	-55611	-61446.4	-65592.2	-56820.3	-62378.2	-52667.2	-67256.1	-54913.6	-64568.3	-69747.5	-68311.3	-66757.9	-51500.6	-70489.1	-70631.6	-79057.6	-63656.9	-81797
		% 1st stimulation	1.09105	2.99609	2.82253	3.10727	3.58077	4.24011	4.03157	2.87616	2.11042	3.64703	5.13273	5.6921	2.80192	5.10189	4.21576	3.52896	4.46006	3.63526	6.52416	6.24764	8.60924	6.33928	5.13086	7.06587	6.82001	5.69616	5.76934	7.01269	7.16606	7.58566	8.38164	8.94716	7.75061	8.50874	7.18411	9.17413	7.49053	8.80749	9.51397	9.31805	9.10616	7.02497	9.61512	9.63455	10.7839	8.68316	11.1576
0.2 Hz stimulation	2019_03_06_0008	raw	-5.36031	-9.92778	-10.7342	-18.2373	-17.2683	-11.1667	-15.4993	-24.3443	-14.9449	-22.3221	-23.0107	-25.9492	-21.1305	-24.2866	-24.8355	-29.8849	-14.9997	-24.9684	-29.0788	-24.4351	-18.7085	-16.9568	-32.7014	-33.4961	-28.3157	-31.1315	-24.9831	-17.2577	-31.4202	-34.7949	-26.4884	-28.0828	-29.7618	-28.8162	-35.301	-24.7851	-34.0544	-43.0484	-32.7798	-48.781	-29.0537	-48.066	-47.3003	-39.5801	-39.8818	-39.3127	-58.7379
		% 1st stimulation	1.0709	1.98341	2.14451	3.64351	3.44991	2.23093	3.09651	4.86358	2.98575	4.45959	4.59716	5.18422	4.22152	4.85207	4.96172	5.97052	2.99669	4.98828	5.80947	4.88174	3.73766	3.38769	6.53321	6.69197	5.657	6.21957	4.99121	3.4478	6.27725	6.95145	5.29194	5.61049	5.94592	5.75701	7.05256	4.95166	6.80352	8.60037	6.54886	9.74563	5.80446	9.60279	9.44981	7.90746	7.96772	7.85403	11.7349
0.2 Hz stimulation	2019_03_07_0001	raw	-33.6314	-11.8408	-20.0585	-18.4677	-36.8359	-42.3316	-47.9895	-47.3136	-51.2255	-45.9272	-34.7709	-34.714	-42.7812	-75.0154	-27.9079	-48.7664	-32.3033	-40.4327	-39.4152	-82.9808	-35.6079	-34.0965	-37.8036	-46.2196	-41.972	-100.853	-45.9495	-50.4281	-50.3382	-46.8043	-53.2302	-103.344	-53.852	-73.7572	-52.9422	-54.7343	-63.279	-63.9348	-62.0252	-71.7527	-64.606	-74.5334	-94.1649	-76.5513	-89.9914	-70.3077	-78.0136
		% 1st stimulation	6.74739	2.3756	4.0243	3.70513	7.3903	8.49289	9.62802	9.49243	10.2773	9.21427	6.976	6.9646	8.5831	15.0502	5.5991	9.78389	6.48093	8.11192	7.90778	16.6482	7.14394	6.84071	7.58445	9.27293	8.42074	20.2339	9.21874	10.1173	10.0992	9.39023	10.6795	20.7337	10.8042	14.7977	10.6217	10.9812	12.6955	12.8271	12.444	14.3956	12.9618	14.9535	18.8921	15.3583	18.0548	14.1057	15.6517
0.2 Hz stimulation	2019_03_29_0037	raw	23.7927	17.725	8.48223	3.62187	-8.63299	-3.05607	-10.9522	-18.504	-3.37192	-28.0921	8.15459	10.8702	-14.8937	3.60727	-6.58191	-5.54503	-19.7443	-3.78667	13.5731	-58.4034	-19.4358	-27.3242	-25.8512	-8.70893	-6.64563	-14.3826	-4.81837	-8.8545	-23.3803	6.79655	-12.0962	-27.8655	-2.77197	-27.7541	-7.5376	-26.6425	-15.1224	-20.1479	-35.0125	-26.119	-10.7773	-19.9446	-33.678	-29.994	-17.0104	-20.6318	-43.3627
		% 1st stimulation	-9.14103	-6.80985	-3.25883	-1.3915	3.31675	1.17413	4.20779	7.10914	1.29548	10.7929	-3.13295	-4.17627	5.7221	-1.3859	2.52874	2.13037	7.58565	1.45482	-5.21472	22.4383	7.46713	10.4978	9.93189	3.34593	2.55322	5.52574	1.85119	3.40186	8.9826	-2.6112	4.64732	10.7058	1.06498	10.663	2.89591	10.2359	5.80995	7.74072	13.4516	10.0348	4.14058	7.66261	12.9389	11.5236	6.53533	7.92663	16.6598
0.2 Hz stimulation	2019_03_29_0043	raw	-15.9333	-18.1182	-33.0157	-31.4302	-21.3497	-26.5522	-36.0923	-31.1057	19.2341	-40.3496	-15.3105	-44.7172	-34.4119	-18.0942	-37.185	-25.8845	-35.2842	-23.6104	-22.5394	-17.0376	-17.8579	-55.7666	-44.6198	-54.9276	-48.7406	-7.61741	-72.3758	-13.5962	-37.2643	-57.5001	-49.3041	-75.4004	-58.7809	-73.1844	-9.14227	-37.0967	-65.742	-84.3685	-58.0214	-11.43	-54.7087	-67.9818	-34.7045	-48.8577	-57.7897	-39.2495	-55.2659
		% 1st stimulation	4.13606	4.70322	8.5704	8.15884	5.54207	6.89257	9.36904	8.07459	-4.99291	10.4742	3.97438	11.6079	8.93285	4.69699	9.6527	6.71924	9.15928	6.12893	5.85089	4.42273	4.63565	14.4762	11.5827	14.2584	12.6524	1.97737	18.7877	3.52939	9.67329	14.9262	12.7986	19.5729	15.2587	18.9976	2.3732	9.62978	17.0657	21.9009	15.0615	2.96706	14.2016	17.6471	9.0088	12.6828	15.0014	10.1886	14.3462
0.2 Hz stimulation	2019_03_31_0002	raw	-6.19904	-4.05286	-11.2476	-4.51081	-6.92874	-6.40534	-11.2005	-10.4846	-19.6549	-9.77493	-3.98077	-4.13785	-12.8061	-6.60577	-11.773	-15.3843	-22.0716	-22.7845	-14.3336	-19.8835	-26.9958	-8.33667	-12.1003	-22.398	-10.9544	-12.5422	-11.6521	-9.12484	-19.4164	-18.1169	-21.9186	-22.4909	-18.5427	-18.6401	-20.3104	-18.7659	-22.5965	-27.8865	-22.0376	-27.7918	-28.4265	-30.3321	-25.3861	-25.2957	-18.13	-22.3702	-21.731
		% 1st stimulation	2.88629	1.88703	5.23695	2.10025	3.22605	2.98235	5.21498	4.88167	9.15141	4.55124	1.85346	1.9266	5.96255	3.07567	5.48157	7.16297	10.2766	10.6086	6.67378	9.25784	12.5693	3.88158	5.63395	10.4286	5.1004	5.83969	5.42525	4.24856	9.04033	8.43532	10.2054	10.4718	8.63355	8.6789	9.4566	8.73749	10.521	12.9841	10.2608	12.94	13.2355	14.1227	11.8198	11.7778	8.44141	10.4156	10.118
			Time (s):
			240	250	260	270	280	290	300	310	320	330	340	350	360	370	380	390	400	410	420	430	440	450	460	470	480	490	500	510	520	530	540	550	560	570	580	590	600	610	620	630	640	650	660	670	680	690	700
0.1 Hz stimulation	2020_02_18_0010	raw	-7.58274	9.46755	16.0782	10.6469
		% 1st stimulation	0.878615	-1.09701	-1.86298	-1.23366
0.1 Hz stimulation	2020_02_18_0012	raw	41.2285	5.00898	23.1123	1.07439	12.3132	-79.9957	19.9309	-12.2754	-66.1321	-50.9701	-53.5594	-35.1968	-23.1505	-48.4806	-57.1561	-7.35924	-65.534	-23.9332	-36.1528	-25.7907	-13.9068	-58.5123	-52.8457	-111.947	-28.3918	-51.3714	-20.2186	-27.3621	-66.6734	-55.1196	-69.7837	-55.7352	-58.1276	-91.482	-64.279	-50.8087	-88.076	-49.7028	-53.4973	-86.1502	-111.7	-73.2869	-98.3165	-71.2876	-92.2533	-65.0553	-45.5257
		% 1st stimulation	-4.75523	-0.577728	-2.66573	-0.123919	-1.42019	9.22658	-2.2988	1.41582	7.62756	5.87881	6.17745	4.05954	2.67014	5.59167	6.59229	0.848802	7.55858	2.76041	4.1698	2.97466	1.60399	6.74871	6.09513	12.9118	3.27466	5.92509	2.33198	3.1559	7.69	6.35741	8.04873	6.42841	6.70434	10.5514	7.41383	5.86019	10.1585	5.73264	6.17029	9.93642	12.8832	8.45279	11.3397	8.22219	10.6403	7.50337	5.25086
0.1 Hz stimulation	2020_02_18_0014	raw	-19.5237	-4.38117	-25.1102	-47.3505	-25.8176	-77.294	-286.816	-157.794	-76.8192	-68.5805	-45.4225	-93.617	-108.26	-81.2294	-79	-85.6719	-74.6338	-82.5138	-101.768	-156.531	-115.699	-125.341	-100.436	-90.0765	-100.464	-138.347	-133.156	-177.098	710.743	-71.3235	-105.252	-172.5	3.46747	-139.953	-245.216	-187.267	-140.71	-149.872	-176.996	-168.177	-95.1178	-166.607	-144.583	-142.564	-194.544	-163.84	-232.471
		% 1st stimulation	2.56387	0.575341	3.29751	6.21814	3.3904	10.1504	37.6651	20.7218	10.088	9.00609	5.96494	12.2939	14.2168	10.6672	10.3744	11.2506	9.80101	10.8358	13.3643	20.5559	15.1937	16.46	13.1894	11.829	13.193	18.168	17.4863	23.2568	-93.3358	9.36631	13.8219	22.653	-0.455353	18.3789	32.2021	24.5922	18.4783	19.6814	23.2434	22.0853	12.491	21.879	18.9869	18.7218	25.5478	21.5156	30.5285
0.1 Hz stimulation	2020_02_18_0015	raw	-6.93089	3.93583	-45.2714	-29.6574	32.5879	19.3537	7.64659	6.35288	-28.9021	-40.3482	-34.594	9.5251	-33.4161	-39.5294	-24.7166	-33.0992	-46.7398	3.7045	-32.3937	-17.9994	-43.9529	-24.3571	-47.8956	-50.4071	-41.5952	-47.524	-71.2271	-50.1687	-43.8385	-44.0756	-51.4462	-45.3642	-64.3713	-32.9901	-74.3229	-28.7104	-37.8178	-40.6732	-57.3414	-55.8775	-29.447	-39.2144	-45.0136	-36.1157	-31.344	-48.077	-30.9599
		% 1st stimulation	1.36119	-0.772979	8.89109	5.82458	-6.4001	-3.80098	-1.50175	-1.24768	5.67624	7.92419	6.79409	-1.87068	6.56278	7.76339	4.85422	6.50052	9.17948	-0.727547	6.36197	3.535	8.63214	4.78363	9.40648	9.89972	8.1691	9.33348	13.9887	9.8529	8.60968	8.65624	10.1038	8.90933	12.6422	6.47911	14.5967	5.63859	7.42724	7.98802	11.2616	10.9741	5.78325	7.70152	8.84045	7.09296	6.15581	9.4421	6.08037
[truncated: 67 more columns]
