# Supplementary material for: Spontaneous and evoked neurotransmission are partially segregated at inhibitory synapses
Source: eLife. 2020 May 13;9:e52852. doi: 10.7554/eLife.52852 (PMC7250572; doi:10.7554/eLife.52852)
Supplement: Figure 5—source data 1. [file elife-52852-fig5-data1.xlsx]

## Sheet: 5C
Measurements are area (pA*ms) of individual evoked responses
Example traces in 5B taken from bolded files
Bolded events excluded from analysis as outliers			Time (s):
Condition:	File Name:		0	5	10	15	20	25	30	35	40	45	50	55	60	65	70	75	80	85	90	95	100	105	110	115		210	215	220	225	230	235	240	245	250	255	260	265	270	275	280	285	290	295	300	305	310	315
KCl w/out PTX	2019_03_06_0005	raw	-604.826	-516.582	-510.144	-513.203	-503.328	-480.07	-483.552	-456.888	-458.231	-480.438	-471.263	-459.619	-452.322	-440.55	-448.078	-453.441	-443.657	-455.385	-461.085	-462.35	-448.834	-443.444	-444.448	-451.571		-8.12825	-47.9012	-80.8385	-93.7639	-90.337	-95.8638	-116.605	-122.049	-111.513	-159.255	-137.78	-178.326	-176.712	-182.268	-180.396	-196.33	-209.805	-198.587	-204.769	-209.286	-222.875	-239.546
		% 1st stimulation	100	85.41	84.3456	84.8513	83.2185	79.3731	79.9488	75.5404	75.7624	79.4339	77.917	75.9919	74.7854	72.839	74.0837	74.9704	73.3528	75.2919	76.2342	76.4434	74.2088	73.3175	73.4836	74.6613		1.3439	7.91983	13.3656	15.5026	14.936	15.8498	19.2792	20.1792	18.4371	26.3306	22.7801	29.4839	29.2169	30.1356	29.826	32.4605	34.6884	32.8338	33.8558	34.6027	36.8494	39.6058
KCl w/out PTX	2019_03_07_0000	raw	-363.552	-262.029	-319.564	-270.035	-225.549	-249.828	-221.687	-207.324	-210.78	-195.734	-188.206	-191.845	-241.585	-195.448	-192.446	-169.186	-174.094	-191.58	-179.564	-229.773	-213.482	-207.005	-198.767	-207.881		-12.3939	-15.7079	-36.7748	-30.2366	-43.5715	-35.6636	-44.3741	-45.0378	-51.5347	-46.652	-48.4147	-55.4219	-49.572	-60.1348	-64.0871	-65.9858	-71.7833	-69.5461	-79.8701	-75.0531	-88.6594	-90.9137
		% 1st stimulation	100	72.0746	87.9005	74.277	62.0404	68.7186	60.9782	57.0273	57.9779	53.8395	51.7688	52.7697	66.4514	53.7608	52.9351	46.5369	47.887	52.6968	49.3915	63.2024	58.7212	56.9396	54.6736	57.1807		3.40911	4.32067	10.1154	8.317	11.9849	9.80976	12.2057	12.3883	14.1754	12.8323	13.3171	15.2446	13.6355	16.5409	17.6281	18.1503	19.745	19.1296	21.9694	20.6444	24.387	25.0071
KCl w/out PTX	2019_03_29_0040	raw	-1295.65	-885.54	-742.579	-753.116	-720.292	-686.061	-698.431	-631.255	-650.259	-680.089	-683.673	-666.257	-683.666	-644.632	-648.805	-614.907	-608.217	-605.35	-647.578	-547.691	-582.412	-619.149	-638.484	-606.222		-14.0275	-55.2896	-65.2095	-42.6726	-66.5604	-77.4294	-135.876	-72.5883	-139.122	-125.361	-136.389	-132.145	-169.701	-128.808	-164.318	-160.176	-141.445	-172.99	-173.859	-178.1	-161.363	-215.461
		% 1st stimulation	146.312	100	83.8561	85.046	81.3393	77.4738	78.8707	71.2847	73.4308	76.7994	77.2041	75.2374	77.2033	72.7954	73.2667	69.4387	68.6832	68.3595	73.1281	61.8482	65.7692	69.9177	72.1011	68.4579		1.58406	6.24361	7.36382	4.81882	7.51637	8.74375	15.3439	8.19707	15.7105	14.1564	15.4018	14.9225	19.1635	14.5457	18.5557	18.088	15.9727	19.535	19.6332	20.112	18.222	24.331
KCl w/out PTX	2019_03_29_0042	raw	-127.551	-119.308	-102.033	-121.522	-107.278	-97.3008	-117.192	-91.2637	-102.713	-89.8215	-101.245	-81.171	-95.3717	-100.335	-84.0322	-108.723	-82.0349	-102.24	-104.464	-79.4087	-94.7726	-91.7112	-59.446	-94.9004		-19.8482	-34.5777	-27.9428	-19.4121	-39.1495	-36.5674	-56.0548	-57.2187	-40.9989	-47.165	-18.2133	-40.0103	-47.1903	-41.5454	-37.7833	-39.6771	-31.6964	-55.3259	-55.7557	-34.0126	-29.3271	-34.3975
		% 1st stimulation	100	93.5379	79.9937	95.2737	84.1061	76.2839	91.8787	71.5508	80.5272	70.4201	79.3763	63.6381	74.7715	78.6626	65.8813	85.2389	64.3155	80.1562	81.8996	62.2565	74.3018	71.9016	46.6057	74.402		15.561	27.1089	21.9072	15.2191	30.6933	28.6689	43.947	44.8595	32.1432	36.9774	14.2793	31.3681	36.9972	32.5717	29.6221	31.1069	24.85	43.3756	43.7125	26.6659	22.9924	26.9677
KCl w/out PTX	2019_03_31_0004	raw	-127.886	-92.8882	-104.86	-82.943	-80.3731	-76.1697	-74.69	-58.2331	-87.7107	-73.4234	-72.045	-67.7616	-65.3469	-63.9405	-62.7	-68.4222	-61.4788	-69.9111	-61.8202	-50.4875	-51.6498	-57.9392	-55.3084	-44.7854		2.26647	-7.10889	-11.334	-7.05239	-27.7296	-15.9933	-17.4387	-13.7714	-9.01725	-13.5721	-10.2485	-19.3595	-20.7515	-18.8837	-30.1838	-20.688	-39.5175	-23.6032	-15.0684	-13.8152	-25.8215	-14.2012
		% 1st stimulation	100	72.6336	81.9952	64.857	62.8475	59.5606	58.4036	45.5352	68.5851	57.4132	56.3354	52.986	51.0978	49.9981	49.028	53.5025	48.0732	54.6668	48.3401	39.4786	40.3874	45.3054	43.2483	35.0198		-1.77226	5.55877	8.86258	5.51459	21.6831	12.5059	13.6362	10.7685	7.05101	10.6126	8.01378	15.1381	16.2266	14.766	23.6021	16.1769	30.9006	18.4565	11.7827	10.8027	20.191	11.1046
KCl W/ PTX	2019_03_06_0002	raw	-733107	-628236	-599908	-577738	-568400	-566533	-554033	-518761	-508231	-477363	-489450	-529043	-515672	-487878	-502940	-502504	-485099	-481073	-41718.5	-457386	-468435	-435903	-463077	-450213		12623.9	6888.49	4762.73	-6462.7	-18644.6	-10110.1	-7998.54	-21964.5	-20692.2	-22779.6	-26250.9	-31084.6	-29555.7	-21085.3	-15471.6	-26736.6	-37628.4	-41729.2	-20541	-37402.3	-30906	-25871
		% 1st stimulation	100	85.695	81.8308	78.8068	77.5331	77.2783	75.5733	70.762	69.3256	65.1151	66.7638	72.1645	70.3406	66.5494	68.6039	68.5444	66.1704	65.6212	5.69064	62.3901	63.8972	59.4597	63.1664	61.4116		-1.72197	-0.93963	-0.649664	0.881549	2.54324	1.37908	1.09105	2.99609	2.82253	3.10727	3.58077	4.24011	4.03157	2.87616	2.11042	3.64703	5.13273	5.6921	2.80192	5.10189	4.21576	3.52896
KCl W/ PTX	2019_03_06_0008	raw	-500.542	-399.168	-362.534	-340.795	-341.68	-338.917	-326.159	-323.099	-317.147	-302.494	-293.72	-325.842	-311.366	-297.042	-314.075	-311.912	-287.116	-288.318	-297.537	-297.451	-301.442	-271.855	-284.403	-292.741		0.219988	4.13794	-10.8382	-9.34128	2.56086	-15.2578	-5.36031	-9.92778	-10.7342	-18.2373	-17.2683	-11.1667	-15.4993	-24.3443	-14.9449	-22.3221	-23.0107	-25.9492	-21.1305	-24.2866	-24.8355	-29.8849
		% 1st stimulation	100	79.7472	72.4283	68.0852	68.262	67.7101	65.1612	64.5498	63.3607	60.4333	58.6805	65.0979	62.2058	59.3442	62.747	62.3149	57.361	57.6012	59.4431	59.4257	60.2231	54.3122	56.8191	58.4848		-0.04395	-0.826692	2.1653	1.86623	-0.511618	3.04825	1.0709	1.98341	2.14451	3.64351	3.44991	2.23093	3.09651	4.86358	2.98575	4.45959	4.59716	5.18422	4.22152	4.85207	4.96172	5.97052
KCl W/ PTX	2019_03_07_0001	raw	-498.436	-398.059	-367.501	-348.678	-332.389	-325.024	-328.704	-328.773	-326.179	-321.915	-309.954	-260.706	-250.493	-261.053	-263.839	-251.94	-251.098	-247	-253.823	-235.07	-243.43	-244.258	-236.248	-237.706		-0.981731	-6.19039	-13.0396	-16.6766	-20.3103	-25.9584	-33.6314	-11.8408	-20.0585	-18.4677	-36.8359	-42.3316	-47.9895	-47.3136	-51.2255	-45.9272	-34.7709	-34.714	-42.7812	-75.0154	-27.9079	-48.7664
		% 1st stimulation	100	79.8617	73.7309	69.9544	66.6865	65.2088	65.9471	65.9609	65.4405	64.5852	62.1853	52.3048	50.2558	52.3744	52.9335	50.5462	50.3773	49.555	50.924	47.1615	48.8389	49.005	47.3978	47.6904		0.196962	1.24196	2.61611	3.34578	4.0748	5.20797	6.74739	2.3756	4.0243	3.70513	7.3903	8.49289	9.62802	9.49243	10.2773	9.21427	6.976	6.9646	8.5831	15.0502	5.5991	9.78389
KCl W/ PTX	2019_03_29_0037	raw	-260.284	-219.937	-164.325	-181.357	-218.691	-193.245	-167.318	-210.788	-215.12	-237.337	-149.48	-153.112	-79.4198	-210.702	-311.56	-206.038	-102.343	-167.664	-179.733	-240.757	-140.555	-186.442	-233.299	-137.33		6.22345	6.82607	-16.8761	-9.22232	1.99664	6.8194	23.7927	17.725	8.48223	3.62187	-8.63299	-3.05607	-10.9522	-18.504	-3.37192	-28.0921	8.15459	10.8702	-14.8937	3.60727	-6.58191	-5.54503
		% 1st stimulation	100	84.4986	63.1327	69.6764	84.0199	74.2437	64.2829	80.9839	82.648	91.1835	57.4296	58.8251	30.5127	80.9508	119.7	79.159	39.3196	64.4156	69.0525	92.4976	54.0006	71.6302	89.6325	52.7615		-2.39102	-2.62254	6.48372	3.54317	-0.767099	-2.61998	-9.14103	-6.80985	-3.25883	-1.3915	3.31675	1.17413	4.20779	7.10914	1.29548	10.7929	-3.13295	-4.17627	5.7221	-1.3859	2.52874	2.13037
KCl W/ PTX	2019_03_29_0043	raw	-634.243	-385.229	-392.691	-362.288	-324.316	-128.047	-312.365	-350.256	-330.613	-318.45	-123.09	-336.343	-306.943	-302.973	-340.325	-256.79	-315.744	-315.349	-219.888	-325.609	-305.749	-322.696	-331.596	-311.356		14.6909	24.3329	-18.9822	-36.5463	-10.2794	-45.1317	-15.9333	-18.1182	-33.0157	-31.4302	-21.3497	-26.5522	-36.0923	-31.1057	19.2341	-40.3496	-15.3105	-44.7172	-34.4119	-18.0942	-37.185	-25.8845
		% 1st stimulation	164.64	100	101.937	94.0447	84.1877	33.239	81.0854	90.9216	85.8225	82.665	31.9524	87.3098	79.6781	78.6475	88.3435	66.659	81.9626	81.8602	57.0797	84.5234	79.3681	83.7674	86.0775	80.8236		-3.81356	-6.31647	4.92751	9.48689	2.66837	11.7155	4.13606	4.70322	8.5704	8.15884	5.54207	6.89257	9.36904	8.07459	-4.99291	10.4742	3.97438	11.6079	8.93285	4.69699	9.6527	6.71924
KCl W/ PTX	2019_03_31_0002	raw	-214.775	-153.977	-103.443	-95.4012	-77.294	-74.8104	-95.5213	-93.7034	-99.4549	-94.6773	-102.964	-109.878	-115.73	-105.77	-108.973	-116.955	-107.286	-101.692	-108.536	-113.986	-125.799	-108.391	-120.465	-131.222		2.14554	-11.4858	-6.22183	-18.2784	-6.96371	-1.93679	-6.19904	-4.05286	-11.2476	-4.51081	-6.92874	-6.40534	-11.2005	-10.4846	-19.6549	-9.77493	-3.98077	-4.13785	-12.8061	-6.60577	-11.773	-15.3843
		% 1st stimulation	100	71.6921	48.1635	44.4191	35.9884	34.832	44.4751	43.6287	46.3066	44.0821	47.9406	51.1594	53.8843	49.2471	50.7382	54.4546	49.9526	47.3482	50.5348	53.0723	58.5725	50.4674	56.0888	61.0976		-0.99897	5.34785	2.89691	8.51051	3.24233	0.901778	2.88629	1.88703	5.23695	2.10025	3.22605	2.98235	5.21498	4.88167	9.15141	4.55124	1.85346	1.9266	5.96255	3.07567	5.48157	7.16297
[truncated: 99 more columns]

## Sheet: 5E
Measurements are summed area (pA*ms) of all events in 1 minute bins
Example traces in 5D came from bolded files at times indicated in figure
Nonlinear regressions in 5F calculated from KCl w/ PTX - no stim and KCl w/ PTX - 0.2 Hz stim data
			Time (s):
Condition:	File Name:		60	120		270	330	390	450	510	570	630	690	750	810
KCl w/out PTX - no stim	2019_02_16_0001	raw	865.642	700.745		512.208	320.157	501.112	1345.7	1280.16	2738.07
		% 1st 2 min	110.527	89.4728		65.4	40.8784	63.9831	171.822	163.454	349.604
KCl w/out PTX - no stim	2019_05_22_0006	raw	1733.3	6863.26		1318.48	1538.9	1006.55	1046.5	1003.89	1570.2	1763.49	1405.88	3366.74	2981.25
		% 1st 2 min	40.3254	159.675		30.6746	35.8027	23.4175	24.3469	23.3557	36.5309	41.0278	32.708	78.3275	69.3591
KCl w/out PTX - no stim	2019_05_24_0000	raw	8367.46	8568.2		1880.04	1686.39	4478.77	5879.87	4523.82	8652.59	6749.99	4328.03	16838.9	7102.1
		% 1st 2 min	98.8147	101.185		22.2022	19.9153	52.8916	69.4377	53.4236	102.182	79.7134	51.1114	198.857	83.8716
KCl w/out PTX - no stim	2019_05_24_0001	raw	3649.83	2615.32		749.9	966.777	1294.32	1390.58	1806.71	2133	2029.18	5015.54	3477.5	2791.85
		% 1st 2 min	116.512	83.4879		23.9388	30.8621	41.3183	44.391	57.6749	68.0911	64.7767	160.109	111.011	89.1232
KCl w/out PTX - no stim	2019_05_24_0004	raw	1253.1	3336.62		2137.64	1049.02	1893.59	3744.83	2652.16	5080.91	5280.47	6355.78	6557.02	5030.94
		% 1st 2 min	54.6048	145.395		93.1489	45.7116	82.5144	163.183	115.57	221.404	230.1	276.957	285.726	219.226
KCl w/out PTX - no stim	2019_05_24_0005	raw	3951.01	4075.82		4792.26	6580.51	3841.42	5152.93	8704.05	6831.07	7354.67	5017.97	6002.64	7260.98
		% 1st 2 min	98.445	101.555		119.406	163.963	95.7146	128.393	216.874	170.206	183.252	125.03	149.564	180.918
KCl w/ PTX - no stim	2019_05_22_0005	raw	7046.62	5142.8		10.2183	23.7317	29.8467	21.4333	0	14.78	40.8467	17.375	12.335	53.3133
		% 1st 2 min	115.619	84.3814		0.167659	0.389382	0.489715	0.351671	0	0.242506	0.670199	0.285083	0.202389	0.874748
KCl w/ PTX - no stim	2019_05_24_0002	raw	15769.6	13927.4		125.43	194.22	273.86	1394.67	604.897	434.48	544.467	949.525	1652.72	690.75
		% 1st 2 min	106.203	93.7967		0.844734	1.30801	1.84437	9.39267	4.0738	2.92609	3.66682	6.39477	11.1305	4.652
KCl w/ PTX - no stim	2019_05_24_0003	raw	6866.58	5855.56		295.015	440.008	316.02	189.915	559.438	391.53	292.475	998.642	854.987	878.635
		% 1st 2 min	107.947	92.053		4.63782	6.91721	4.96803	2.98558	8.79472	6.1551	4.59789	15.6993	13.4409	13.8127
KCl w/ PTX - no stim	2019_05_24_0006	raw	2926.52	8264.06		405.68	143.19	108.148	78.2	93.19	78.6667	82.07	169.068	94.9133	189.357
		% 1st 2 min	52.3034	147.697		7.25038	2.55912	1.93285	1.3976	1.66551	1.40594	1.46677	3.02162	1.69631	3.38421
KCl w/ PTX - no stim	2019_05_24_0008	raw	6120.25	11115		74.0067	54.485	235.78	79.3833	93.5867	91.255	153.128	191.718	1533.53	325.607
		% 1st 2 min	71.0202	128.98		0.858782	0.63225	2.73602	0.921174	1.08599	1.05893	1.77692	2.22472	17.7953	3.77838
KCl w/ PTX - no stim	2019_02_16_0002	raw	3005.88	890.012		32.3833	22.9067	92.9883	136.208	85.6167	59.1083	413.613	94.995	65.9017
		% 1st 2 min	154.31	45.6897		1.66243	1.17594	4.77366	6.99239	4.39523	3.03439	21.2333	4.87667	3.38314
KCl w/out PTX - 0.2 Hz stim	2019_03_06_0005	raw	4248.85	2032.21		2340.88	1449.88	2121.97	2296.35	1608.73	3363.92	2853.09	2974.55	3315.77	2703.22
		% 1st 2 min	135.291	64.7091		74.5379	46.1666	67.5673	73.1198	51.2249	107.113	90.8473	94.7151	105.58	86.0753
KCl w/out PTX - 0.2 Hz stim	2019_03_07_0000	raw	3256.19	4338.17		2590.01	2113.82	1901.12	3899.78	4265.27	7953.09	6416.71	5988.58	5697.23	5691.27
		% 1st 2 min	85.7529	114.247		68.2086	55.6681	50.0668	102.702	112.327	209.447	168.986	157.711	150.038	149.882
KCl w/out PTX - 0.2 Hz stim	2019_03_29_0040	raw	3379.36	3738.76		2046.49	1078.4	1301.75	2176.24	2545.58	3456.76	2847.38	3614.62	3775.73
		% 1st 2 min	94.951	105.049		57.5008	30.3002	36.5758	61.1465	71.5241	97.1256	80.0038	101.561	106.088
KCl w/out PTX - 0.2 Hz stim	2019_03_29_0042	raw	1324.04	1092.74		249.788	401.59	214.553	298.9	494.747	647.133	518.64	609.752	592.502
		% 1st 2 min	109.57	90.4295		20.6712	33.2336	17.7554	24.7355	40.9427	53.5535	42.92	50.46	49.0325
KCl w/out PTX - 0.2 Hz stim	2019_03_31_0004	raw	1727.51	1348.69		777.132	365.863	451.345	516.513	331.483	341.583	397.332	323.912	244.915	246.878
		% 1st 2 min	112.315	87.6854		50.5255	23.7867	29.3443	33.5813	21.5515	22.2081	25.8326	21.0592	15.9232	16.0509
KCl w/ PTX - 0.2 Hz stim	2019_03_06_0002	raw	4292.97	4613.83		97.225	99.375	35.3983	212.84	94.6467	470.408	778.805	919.565	1271.24	1409.35
		% 1st 2 min	96.3976	103.602		2.18316	2.23144	0.79486	4.77927	2.12527	10.5629	17.4879	20.6486	28.5454	31.6465
KCl w/ PTX - 0.2 Hz stim	2019_03_06_0008	raw	2791.15	1141.84		96.0483	20.075	23.915	45.2517	54.465	48.315	66.94	34.085	38.0417
		% 1st 2 min	141.935	58.0647		4.88423	1.02085	1.21612	2.30113	2.76965	2.45691	3.40402	1.73328	1.93449
KCl w/ PTX - 0.2 Hz stim	2019_03_07_0001	raw	3366.64	2853.78		42.5417	28.3583	21.0117	59.295	55.2283	179.455	212.453	124.353	402.483	674.25
		% 1st 2 min	108.245	91.7552		1.36781	0.911783	0.675571	1.90646	1.77571	5.76987	6.83084	3.99823	12.9407	21.6786
KCl w/ PTX - 0.2 Hz stim	2019_03_29_0037	raw	4073.51	4831.36		1424.17	507.708	209.633	64.3067	110.207	519.19	99.945	428.43	892.23
		% 1st 2 min	91.4895	108.51		31.9862	11.4029	4.70828	1.4443	2.4752	11.6608	2.24472	9.62237	20.0391
KCl w/ PTX - 0.2 Hz stim	2019_03_29_0043	raw	7597.3	8223.28		76.6767	36.04	47.7683	64.8717	100.288	116.595	343.69	31.005	45.192	54.815
		% 1st 2 min	96.0432	103.957		0.969328	0.455609	0.603876	0.820092	1.26782	1.47397	4.34485	0.391958	0.571306	0.692958
KCl w/ PTX - 0.2 Hz stim	2019_03_31_0002	raw	1484.31	2637.94		59.4733	39.1483	61.2167	69.7283	130.563	91.375	103.502
		% 1st 2 min	72.0146	127.985		2.88547	1.89936	2.97006	3.38302	6.33456	4.43325	5.0216
