# Supplementary material for: Spontaneous and evoked neurotransmission are partially segregated at inhibitory synapses
Source: eLife. 2020 May 13;9:e52852. doi: 10.7554/eLife.52852 (PMC7250572; doi:10.7554/eLife.52852)
Supplement: Figure 6—source data 1. [file elife-52852-fig6-data1.xlsx]

## Sheet: 6C
Measurements are area (pA*ms) of individual evoked responses
Example traces from 6B came from bolded files
			Time (s):
Condition:	File Name:		0	5	10	15	20	25	30	35	40	45	50	55	60	65	70	75	80	85	90	95	100	105	110	115		270	275	280	285	290	295	300	305	310	315	320	325	330	335	340	345	350	355	360	365	370	375
Muscimol w/out PTX	2019_12_11_0010	raw	-1561.82	-1127.6	-1174.07	-1083.74	-878.688	-1077.76	-990.908	-819.199	-887.096	-788.949	-950.962	-846.206	-830.296	-855.224	-915.069	-821.303	-802.95	-831.123	-775.418	-801.003	-731.969	-780.687	-763.988	-796.848		43.8368	-0.738361	36.403	-15.5508	-23.2042	-38.4929	-81.5657	-93.4078	-131.836	-197.667	-265.71	-226.684	-284.878	-318.767	-290.174	-290.598	-375.288	-368.666	-381.362	-392.437	-371.101	-414.718
		% 1st stimulation	100	72.1979	75.1733	69.3895	56.2606	69.0067	63.4458	52.4516	56.7989	50.5147	60.8881	54.1808	53.1621	54.7582	58.59	52.5863	51.4112	53.2151	49.6484	51.2865	46.8664	49.9857	48.9165	51.0205		-2.80678	0.0472757	-2.33081	0.995683	1.48571	2.46462	5.22248	5.98071	8.44119	12.6562	17.0129	14.5141	18.2401	20.41	18.5792	18.6064	24.0289	23.6049	24.4178	25.1269	23.7608	26.5535
Muscimol w/out PTX	2019_12_17_0003	raw	-674904	-602239	-548845	-633375	-541804	-517924	-547666	-473608	-548911	-543673	-454060	-570761	-551174	-585940	-602774	-585447	-560386	-546254	-593580	-594471	-608456	-582300	-582456	-567217		772.902	-321.173	54779.5	113506	86216.2	69976.6	8153.81	83271.3	25031.5	-49897.3	-2743.76	-8078.91	-80891.7	-92205.7	-145707	-180076	-133249	-176683	-166483	-187219	-195384	-259895
		% 1st stimulation	100	89.2333	81.3219	93.8466	80.2786	76.7404	81.1471	70.1742	81.3317	80.5556	67.2777	84.5692	81.667	86.8182	89.3125	86.7452	83.0319	80.9381	87.9503	88.0822	90.1545	86.2789	86.3021	84.044		-0.11452	0.047588	-8.11664	-16.8181	-12.7746	-10.3684	-1.20814	-12.3382	-3.7089	7.39325	0.406541	1.19705	11.9857	13.662	21.5893	26.6818	19.7435	26.179	24.6676	27.7402	28.9499	38.5084
Muscimol w/out PTX	2020_02_04_0007	raw	-1.01574e+06	-822005	-790584	-781337	-744092	-765779	-690912	-713581	-648519	-594830	-573227	-586046	-561563	-630620	-543676	-515290	-585376	-555821	-593622	-539508	-550710	-581807	-569145	-573160		-198174	-70427.5	-60099.7	-140957	-117128	-118834	-142715	-143932	-147006	-196410	-190230	-157174	-232257	-224778	-245275	-296246	-228063	-183562	-217938	-265379	-271397	-263414
		% 1st stimulation	100	80.9264	77.833	76.9226	73.2559	75.3909	68.0203	70.252	63.8467	58.561	56.4342	57.6962	55.2858	62.0846	53.5249	50.7303	57.6302	54.7206	58.4421	53.1146	54.2174	57.2789	56.0323	56.4276		19.5102	6.93358	5.91681	13.8772	11.5313	11.6992	14.0503	14.1701	14.4728	19.3366	18.7281	15.4738	22.8657	22.1293	24.1473	29.1654	22.4528	18.0717	21.456	26.1266	26.7191	25.9331
Muscimol w/out PTX	2020_02_05_0000	raw	-1.00482e+06	-788264	-669358	-675224	-657578	-650831	-594206	-669342	-648961	-592319	-585437	-645442	-612257	-659085	-641951	-603340	-610593	-583968	-597538	-571030	-595013	-564139	-574174	-552636		-64845.6	-98547.2	-82346.5	-79119.6	-104870	-140919	-142604	-183969	-130610	-166598	-165665	-221831	-171546	-229807	-218435	-200367	-250457	-233345	-301383	-286720	-292602	-291029
		% 1st stimulation	100	78.4481	66.6146	67.1984	65.4423	64.7708	59.1355	66.613	64.5847	58.9477	58.2628	64.2344	60.9319	65.5922	63.887	60.0445	60.7663	58.1166	59.4671	56.8289	59.2158	56.1432	57.1419	54.9984		6.45344	9.80743	8.19514	7.87399	10.4366	14.0243	14.192	18.3087	12.9984	16.5798	16.487	22.0767	17.0722	22.8705	21.7387	19.9405	24.9255	23.2225	29.9937	28.5345	29.1198	28.9632
Muscimol w/ PTX	2019_12_04_0008	raw	-673032	-549320	-512009	-484580	-462621	-464854	-457583	-354040	-436677	-427022	-412707	-429394	-427060	-415395	-420981	-395456	-382678	-330243	-344915	-380401	-356429	-362411	-382880	-399490		-13571.4	185007	-1393.07	-6500.6	-5420.21	-4964.25	-5598.91	-13582.5	-14797.8	-24050	-18771.1	-41055.2	-31938	-4701.09	-4578.79	-56076.1	-26909.3	-76815.8	-38779	-39861.2	-56689.4	-68341.6
		% 1st stimulation	100	81.6188	76.075	71.9996	68.7369	69.0686	67.9883	52.6038	64.8821	63.4475	61.3206	63.8	63.4532	61.72	62.5499	58.7575	56.8589	49.068	51.248	56.5205	52.9588	53.8475	56.8889	59.3568		2.01646	-27.4886	0.206984	0.965869	0.805342	0.737595	0.831894	2.01811	2.19867	3.57338	2.78904	6.10003	4.74539	0.698494	0.680322	8.33186	3.99822	11.4134	5.76184	5.92263	8.42299	10.1543
Muscimol w/ PTX	2019_12_10_0002	raw	-432775	-382206	-360068	-309912	-346939	-363827	-334747	-313515	-322000	-332889	-315906	-317933	-298941	-318003	-313241	-307522	-299063	-316436	-303292	-311043	-292609	-286930	-293445	-277551		194478	165445	77278.9	55710.5	9865.12	10458.1	-27136.5	-52606.7	-30720.8	-10683.5	-29017.5	-41799.5	-62958.6	-33424.9	-13551.9	-69787.5	-81849.1	-38591.6	-80902.3	-79502.3	-88874.9	-85185.7
		% 1st stimulation	100	88.3151	83.1998	71.6103	80.1661	84.0684	77.3488	72.4429	74.4035	76.9195	72.9953	73.4637	69.0754	73.4799	72.3796	71.0581	69.1034	73.1177	70.0808	71.8716	67.6121	66.3001	67.8055	64.1329		-44.9373	-38.2287	-17.8566	-12.8728	-2.2795	-2.41651	6.27033	12.1557	7.09857	2.4686	6.70497	9.65847	14.5476	7.72338	3.13139	16.1256	18.9126	8.91723	18.6938	18.3703	20.536	19.6836
Muscimol w/ PTX	2020_02_04_0005	raw	-562907	-453557	-471739	-459781	-466553	-507748	-423693	-486699	-422084	-476274	-373404	-349284	-386738	-453272	-425167	-403987	-394846	-383633	-373637	-383112	-422970	-434249	-344086	-425259		-87904	-9102.36	6038.09	-32120.7	-34534.4	-13682.4	-20855.4	-51935.8	-31164.3	-29457.1	-48846.9	-47341	-45031	-63945.1	-80593.5	-55033.1	-58839.2	-84561	-65959.5	-72620.5	-89424.9	-99853.9
		% 1st stimulation	100	80.574	83.804	81.6796	82.8828	90.2009	75.2687	86.4617	74.9829	84.6097	66.3348	62.0499	68.7036	80.5235	75.5305	71.7679	70.144	68.1521	66.3764	68.0595	75.1402	77.144	61.1265	75.5469		15.6161	1.61703	-1.07266	5.70621	6.135	2.43067	3.70494	9.22635	5.53631	5.23304	8.67762	8.41009	7.99972	11.3598	14.3174	9.77659	10.4527	15.0222	11.7176	12.901	15.8862	17.739
Muscimol w/ PTX	2020_02_04_0006	raw	-1.33791e+06	-1.04241e+06	-992106	-863330	-893888	-888845	-876460	-846914	-824425	-810189	-794479	-777473	-776171	-729156	-743077	-725046	-727290	-752189	-721231	-709353	-587832	-682155	-679743	-675284		-222118	-43315.4	-47903	-28019.3	-31124.7	-62047.9	-49719.4	-49688.5	-41824.8	-58466.7	-69739.5	-70700.3	-99150.6	-106033	-106009	-100118	-124653	-96285.5	-139137	-131889	-174019	-143030
		% 1st stimulation	100	77.9137	74.1535	64.5283	66.8124	66.4354	65.5097	63.3013	61.6204	60.5563	59.3821	58.1111	58.0137	54.4997	55.5402	54.1925	54.3602	56.2212	53.9074	53.0195	43.9366	50.9866	50.8063	50.4731		16.6019	3.23754	3.58044	2.09426	2.32637	4.63768	3.71621	3.71389	3.12613	4.37001	5.21258	5.28439	7.41086	7.92526	7.92349	7.48321	9.31701	7.19672	10.3996	9.85783	13.0068	10.6905
[truncated: 98 more columns]

## Sheet: 6E
Measurements are summed area (pA*ms) of all events in 1 minute bins
Example traces in figure 6D came from bolded files
Nonlinear regressions calculated from this data			Time (s):
Condition:	File Name:		60	120		420	480	540	600	660	720	780	840	900
Muscimol w/ PTX - no stim	2019_12_11_0000	raw	17519.5	11855.3		3854.23	1650.19	3613.25	1080.07	1185.33	1227.03	1386.21	1251.93	1278.76
		% 1st 2 min	119.283	80.7175		26.2417	11.2354	24.601	7.35371	8.07038	8.3543	9.43808	8.52383	8.7065
Muscimol w/ PTX - no stim	2019_12_11_0005	raw	12910.3	21105.5		1394.28	602.77	3082.67	4384.48	7009.18	4270.65	5629.42	2518.7	6010.6
		% 1st 2 min	75.9077	124.092		8.19782	3.54405	18.1249	25.779	41.2112	25.1098	33.0988	14.809	35.34
Muscimol w/ PTX - no stim	2020_02_04_0001	raw	5962.92	6020.71		1391.16	1294.31	1367.25	1113.13	966.76	7402.47	1675.78	1838.91	1941.58
		% 1st 2 min	99.5178	100.482		23.2177	21.6013	22.8186	18.5775	16.1347	123.543	27.9678	30.6904	32.4039
Muscimol w/ PTX - no stim	2020_02_04_0004	raw	30370.2	67902		5675.56	6391.24	4002.59	6120.99	3201.48	4467.67	5616.58	2301.17	5562.81
		% 1st 2 min	61.8083	138.192		11.5507	13.0072	8.14593	12.4572	6.51554	9.09244	11.4307	4.68326	11.3212
Muscimol w/ PTX - no stim	2020_02_05_0004	raw	29176.2	159075		1210.28	1097.41	544.56	479.41	759.19	1727.52	929.98	5919.72	3540.76
		% 1st 2 min	30.997	169.003		1.28581	1.1659	0.578545	0.509329	0.806569	1.83533	0.988018	6.28916	3.76173
Muscimol w/ PTX - no stim	2020_02_12_0003	raw	38564.4	46621		567.85	288.73	1588.65	923.29	1015.07	2614.3	451.19	443.69	895.48
		% 1st 2 min	90.5423	109.458		1.33321	0.677886	3.72986	2.16772	2.3832	6.13791	1.05931	1.0417	2.10243
Muscimol w/ PTX - 0.2 Hz stim	2019_12_04_0008	raw	12721.8	20327.1				614.24	946.99	1201.75	1039.1	1565.88	1395.05	1347.08
		% 1st 2 min	76.9875	123.012				3.71716	5.73085	7.27256	6.28826	9.47615	8.44235	8.15205
Muscimol w/ PTX - 0.2 Hz stim	2019_12_10_0002	raw	23961.8	24904.3		1564.57	4102.63	5381.55	7470.88	7416.1	15426.5	10945.9	10695.1	12760.7
		% 1st 2 min	98.0712	101.929		6.40349	16.7913	22.0257	30.5769	30.3527	63.1379	44.7997	43.7729	52.2273
Muscimol w/ PTX - 0.2 Hz stim	2020_02_04_0005	raw	7910.39	13160.7		1905.14	811.89	713.1	1027.04	1737.55	1302.39	2027.37	2694.23	2823.3
		% 1st 2 min	75.083	124.917		18.083	7.70621	6.76853	9.74835	16.4923	12.3619	19.2432	25.5728	26.7979
Muscimol w/ PTX - 0.2 Hz stim	2020_02_04_0006	raw	28404.9	88358.9		337165	556860	720914	762569	775089	744610	929656	868008	933588
		% 1st 2 min	48.6536	151.346		577.516	953.823	1234.82	1306.17	1327.62	1275.41	1592.37	1486.78	1599.11
